# Supplementary material
Source: PubMed Central journal article supplement (PMC3272375)
Supplement: NIHMS37119-supplement-1.pdf [file NIHMS37119-supplement-1.pdf]

## **META-ANALYSIS OF GENOME-WIDE ASSOCIATION STUDIES IDENTIFIES THREE NEW RISK LOCI FOR ATOPIC DERMATITIS**

Lavinia Paternoster; Marie Standl; Chih-Mei Chen; Adaikalavan Ramasamy; Klaus Bønnelykke; Liesbeth Duijts; Manuel A Ferreira; Alexessander Couto Alves; Jacob P Thyssen; Eva Albrecht; Hansjörg Baurecht; Bjarke Feenstra; Patrick MA Sleiman; Pirro Hysi; Nicole M Warrington; Ivan Curjuristic; Ronny Myhre; John A Curtin; Maria M Groen-Blokhuis; Marjan Kerkhof; Annika Sääf; Andre Franke; David Ellinghaus; Regina Fölster-Holst; Emmanouil Dermitzakis; Stephen B Montgomery; Holger Prokisch; Katharina Heim; Anna-Liisa Hartikainen; Anneli Pouta; Juha Pekkanen; Alexandra IF Blakemore; Jessica L Buxton; Marika Kaakinen; David L Duffy; Pamela A Madden; Andrew C Heath; Grant W Montgomery; Philip J Thompson; Melanie C Matheson; Peter Le Souëf; AAGC collaborators; Beate St Pourcain; George Davey Smith; John Henderson; John P Kemp; Nicholas J Timpson; Panos Deloukas; Susan M Ring; H-Erich Wichmann; Martina Müller-Nurasyid; Natalija Novak; Norman Klopp; Elke Rodríguez; Wendy McArdle; Allan Linneberg; Torkil Menné; Ellen A Nohr; Albert Hofman; André G Uitterlinden; Cornélia M van Duijn; Fernando Rivadeneira; Johan C de Jongste; Ralf JP van der Valk; Matthias Wjst; Rain Jogi; Frank Geller; Heather A Boyd; Jeffrey C Murray; Cecilia Kim; Frank Mentch; Michael March; Massimo Mangino; Tim D Spector; Veronique Bataille; Craig E Pennell; Patrick G Holt; Peter Sly; Carla MT Tiesler; Elisabeth Thiering; Thomas Illig; Medea Imboden; Wenche Nystad; Angela Simpson; Jouke-Jan Hottenga; Dirkje Postma; Gerard H Koppelman; Henriette A Smit; Cilla Söderhäll; Bo Chawes; Eskil Kreiner-Møller; Hans Bisgaard; Erik Melén; Dorret I Boomsma; Adnan Custovic; Bo Jacobsson; Nicole M Probst-Hensch; Lyle J Palmer; Daniel Glass; Hakon Hakonarson; Mads Melbye; Deborah L Jarvis; Vincent WV Jaddoe; Christian Gieger; The GOYA consortium; David P Strachan; Nicholas G Martin; Marjo-Riitta Jarvelin; Joachim Heinrich; David M Evans; Stephan Weidinger for the EARly Genetics and Lifecourse Epidemiology (EAGLE) Consortium

## **SUPPLEMENTARY MATERIAL**

### **i. Supplementary Note**

**Study sample descriptions**  
**Collaborating consortia members**  
**Acknowledgements**  
**Funding**

### **ii. Supplementary Tables**

**Supplementary Table 1. Study characteristics - discovery & replication**  
**Supplementary Table 2. Study genetic & analysis methods - discovery & replication**  
**Supplementary Table 3. Discovery and replication results of the top 11 SNPs for AD**  
**Supplementary Table 4. AD association results from the discovery meta-analysis for the 15 loci associated with asthma or total serum IgE levels in a recent GWAS.**  
**Supplementary Table 5. Meta-analysis results for interactions between the three identified loci.**  
**Supplementary Table 6. ImmunoChip association results for region 5q31.1**  
**Supplementary Table 7. ImmunoChip linkage disequilibrium for region 5q31.1**

### **iii. Supplementary Figures**

**Supplementary Figure 1. QQ plot for the discovery genome-wide association meta-analysis**  
**Supplementary Figure 2. Regional association plots for the top 11 regions**  
**Supplementary Figure 3. FLG adjusted meta-analysis**  
**Supplementary Figure 4. 11q13 regional association plot and forest plot**  
**Supplementary Figure 5. Forest plots of the association of the 7 SNPs which did not meet genome-wide significance.**  
**Supplementary Figure 6. MuTHER pilot skin eQTL data for probes within 1Mb of the SNP (a) rs479844, (b) rs2164983 and (c) rs2897442 for 160 female twins.**  
**Supplementary Figure 7. Regional association plots for 5q31.1 in the discovery cohorts (a) no conditional SNPs and (b) conditional on rs2897442.**  
**Supplementary Figure 8. Regional association plot of markers within the cytokine cluster on 5q31.1.**  
**Supplementary Figure 9. Stratified forest plots for SNPs associated with AD or with evidence of heterogeneity.**

### **iv. Supplementary References**

## SUPPLEMENTARY NOTE

### Note on nomenclature

The extant nosology of atopic disease is confusing, and terms such as *atopic dermatitis*, *eczema*, *atopic eczema*, *endogenous eczema* and *flexural dermatitis* are frequently used interchangeably in the literature. Recently, a World Allergy Organization (WAO) report suggested the use of *eczema* as preferable to *atopic dermatitis*<sup>1</sup>. However, in this article, we continued to use the term atopic dermatitis, as many studies used for this project were designed prior to the WAO report and because this is the term used in many questionnaires on which the results presented here are based.

### STUDY SAMPLE DESCRIPTIONS

#### Australian Asthma Genetics Consortium (AAGC) replication cohort

As part of the AAGC, we performed a GWAS of asthma in 7,197 unrelated individuals of European ancestry ascertained from the Australian population as described in detail elsewhere {Ferreira, submitted}. For this analysis, we tested 10 SNPs for association with AD status in 3,881 individuals (49% males, mean age 35 years, range 3 to 89), including 269 who reported having had AD at any point in their lifetime diagnosed by a doctor and 3,612 AD-free controls. These individuals participated in one of five studies: QIMR (N=3,132), CAPS (N=53), LIWA (N=474), MESCA (N=64) or TAHS (N=158). The QIMR individuals included in the AAGC analysis are unrelated to those included in the QIMR discovery cohort described below. Genotyping was performed with Illumina 610K or 370K arrays and stringent quality control filters applied as described in Supplementary Table 2. Imputation to HapMap 3 (all 11 populations, Feb 2009 release) and 1000 Genomes Project (CEU, Mar 2010 release) SNPs was performed with Impute2 and SNPs tested for association with disease status using logistic regression in PLINK, with sex and array type included as a covariate. Participants provided informed consent to participate in this study, which was approved by the respective ethics committees.

#### The Avon Longitudinal Study of Parents and Children (ALSPAC)

The Avon Longitudinal Study of Parents and their Children (ALSPAC) is a longitudinal population-based birth cohort that recruited pregnant women residing in Avon, UK, with an expected delivery data between 1st April 1991 and 31st December 1992. 14,541 pregnant women were initially enrolled with 14,062 children born (see <sup>2</sup> and website <http://www.alspac.bris.ac.uk>). Biological samples including DNA have been collected for 10,121 of the children from this cohort. Ethical approval was obtained from the ALSPAC Law and Ethics committee and relevant local ethics committees, and written informed consent provided by all parents. Questionnaire data has been collected regularly, with extensive questions, including those relating to AD. In this study we included data from the following questions, asked when the children were approximately 81, 91, 103 months, 10, 13 and 14 years [possible answers]:

1. Has your child in the past 12 months had eczema? [yes, saw a Dr; Yes, but did not see a Dr; No, did not have]
2. Has a doctor ever actually said that your child has eczema? (10 & 14 years only) [yes; no]

We defined cases as those individuals who answered 'Yes, and saw a Dr' to Q1 or 'yes' to Q2. We defined controls as those individuals who answered 'no' to Q2 at age 14 years.

#### Discovery Cohort Genotyping and Statistical Analysis

Subjects were genotyped using either Illumina 317K or 610K genome-wide SNP genotyping platforms by the Wellcome Trust Sanger Institute, Cambridge, UK and the Centre National de Génotypage, Evry, France. A common set of SNPs were extracted and the resulting raw genome-wide data was subjected to standard quality control methods. Individuals were excluded on the basis of having incorrect gender assignments; minimal (0.34) or excessive (0.36) heterozygosity; disproportionate levels of individual missingness (>3%) and evidence of cryptic relatedness (PI HAT > 0.11). The remaining individuals were assessed for evidence of population stratification by multidimensional scaling analysis, using CEU, Yoruba, Japanese and Chinese individuals as reference ethnic groups. The underlying population stratification was thereafter controlled for by using EIGENSTRAT derived ancestry informative covariates. SNPs with a minor allele frequency of < 0.5% and call rate of < 97% were removed. Furthermore, only SNPs which passed an exact test of Hardy-Weinberg equilibrium ( $P > 5E-7$ ) were considered for analysis. The resulting dataset consisted of 3233 individuals and 285,531 SNPs. Missing genotypes were subsequently imputed with MACH 1.0 Markov Chain Haplotyping software, using CEPH individuals from phase two of the HapMap project as a reference set (release 22). The final imputed dataset consisted of 3233 subjects, each with 2,483,534 imputed markers. 2811 of which also had AD phenotype information (909 cases and 1902 controls).

Genome-wide association analysis of AD was carried out in MACH2DAT<sup>3,4</sup> regressing expected allelic dosage on case-control status, including sex as a covariate.

R501X and 2282del4 have been genotyped in a previous study on 2634 subjects<sup>5</sup>. In the FLG adjusted analysis, these were included as covariates (using an additive model).

#### Replication Cohort Genotyping and Statistical Analysis

Subjects were genotyped using the Illumina HumanHap550 quad genome-wide SNP genotyping platform by 23andMe subcontracting the Wellcome Trust Sanger Institute, Cambridge, UK and the Laboratory Corporation of America, Burlington, NC, US. Individuals were excluded on the basis of having incorrect gender assignments; minimal or excessive heterozygosity (<0.32 and >0.345 for the Sanger data and <0.31 and >0.33 for the LabCorp data); disproportionate levels of individual missingness (>3%); evidence of cryptic relatedness (>10% IBD) and being of non-European ancestry. The resulting dataset consisted of 9233 individuals. SNPs with a

minor allele frequency of < 1% and call rate of < 95% were removed. Furthermore, only SNPs which passed an exact test of Hardy-Weinberg equilibrium ( $P > 5E-7$ ) were considered for analysis. Genotypes were subsequently imputed with MACH 1.0.16 Markov Chain Haplotyping software, using CEPH individuals from phase 2 of the HapMap project as a reference set (release 22). Of the 9233 ALSPAC genotyped individuals, 2903 also had AD phenotype information (895 cases and 2008 controls) and were not included in the ALSPAC discovery set.

Replication association analysis of the 10 SNPs was carried out as per the discovery cohort methods.

### **BAMSE**

BAMSE is a Swedish birth cohort study. A total number of 4,089 newborn infants were recruited between 1994 and 1996 in the Stockholm area<sup>6</sup>. The first questionnaire data, dealing with parental allergic diseases, socio-economic status and residential characteristics, was obtained when the children were about 2 months. Similar questionnaires with a focus on the children's symptoms related to asthma and allergic diseases including eczema were answered by the parents when the children were approximately 1, 2, 4 and 8 years old. At 8 years of age, all children were invited to clinical testing, and blood samples were obtained from 2,480 children (~60%). DNA was extracted from 2,033 samples after exclusion of samples with too little blood, lack of questionnaire data, or if parental consent to genetic analysis of the sample was not obtained. From these samples, all children with a doctor's diagnosis of asthma (ever) and children with no history of eczema or other allergic diseases (controls) underwent GWAS genotyping<sup>7</sup>. Among asthmatics, all children with doctor's diagnosis of eczema (ever) were identified and after QC, a total of 100 eczema (ever) cases and 246 controls were included in this study.

BAMSE genotyping was conducted as part of the GABRIEL consortium. Genotyping in GABRIEL was carried out at Centre National de Génotypage (Evry, France) using the Illumina Human610 quad array (Illumina, Inc., San Diego, CA)<sup>7</sup>. An ancestry analysis was performed using EIGENSTRAT, and putative non-Caucasian samples were flagged as outliers and eliminated from subsequent analyses. Imputation to HapMap CEU release 22 was conducted using MACH v.1.0.16 with option MLE (original genotypes were only replaced if the underlying reference haplotypes strongly contradict the input genotypes). Samples from the British 1958 birth cohort (B58C) with greater than 95% genotyping success rate were selected to estimate model parameters of error rates and recombination rates for step 1 of the imputation procedure. In step 2, all GABRIEL cohorts were imputed, no SNP/sample QC filters were applied to individual cohorts prior to this.

Genome-wide association analysis of AD was carried out in ProbABEL<sup>8</sup> regressing expected allelic dosage on case-control status, including sex as a covariate. The study was approved by the Ethics Committee of Karolinska Institutet, Stockholm, Sweden.

### **British 1958 birth cohort (B58C)**

The British 1958 birth cohort is an ongoing follow-up of all persons born in England, Scotland and Wales during one week in 1958. At age 7 years, a history of eczematous rashes was obtained by interview with a parent, and the presence of visible AD on skin examination was recorded by a school medical officer<sup>9</sup>. For the purpose of this meta-analysis, cases were defined by a positive interview response for either AD during the first year of life, or AD after the first year (ie. ages 1-7), or both. (The results of skin examination were not used to define cases.) Controls were defined as children with no parentally reported history of AD by age 7, and no record of AD on skin examination at age 7.

At the age of 44-45 years, the cohort were followed up with a biomedical examination and blood sampling<sup>10</sup>, from which a DNA collection was established as a nationally representative reference panel (<http://www.b58cgene.sgu.ac.uk/>). The discovery phase of the analysis used two non-overlapping subsets of the DNA collection which were selected as controls for use by the Wellcome Trust Case-Control Consortium (WTCCC)<sup>11</sup> and the Type 1 Diabetes Genetics Consortium (T1DGC)<sup>12</sup>. Genotyping by the WTCCC used the Affymetrix 500K array and the T1DGC used the Illumina 550K array. Imputations using the HapMap 2 (release 21) template were performed using SNPTEST for the WTCCC subset and MACH for the T1DGC subset. Within-cohort logistic regression analyses for AD were performed using Quicktest for the WTCCC subset and ProbABEL for the T1DGC subset.

In silico replication analyses were performed using Illumina 550K/610K genotypes deposited by the GABRIEL consortium<sup>7</sup> and by the WTCCC on cohort members that had not been included in the discovery sets. Imputations for the replication set using the HapMap 2 (release 21) template were performed using MACH and within-cohort logistic regression analyses for eczema were performed using ProbABEL.

## **CHOP**

CHOP patients and controls were recruited at the Children's Hospital of Philadelphia between 2006 and 2010. All subjects were of self-reported Caucasian origin and resident in the Greater Philadelphia area. Ethical approval for this study was obtained from the Institutional Review Board of the Children's Hospital of Philadelphia. The study included 519 patients with physician-diagnosed eczema and 1004 disease-free controls without eczema. Cases were defined by the presence of the ICD9 code for eczema (691.8) in their electronic medical records. All CHOP samples were genotyped on either the Illumina HH550 or HH610 BeadChips (Illumina, San Diego) at the Center for Applied Genomics.

In addition to self-reported ancestry, Principal Component Analysis was carried on all cases and controls using smartPCA to reduce the risk of population stratification. Mean age of the case cohort was 9 years and 51% were males and 49% females.

### Genotyping QC measures, imputation, analysis

Prior to imputation, quality control was carried out in *plink* resulting in the exclusion of 10,930 SNPs with call rates <95%, 22,252 SNPs with a minor allele frequency (MAF) <1% and 13,181 SNPs with Hardy Weinberg

equilibrium  $P < 10^{-5}$ ; the genomic inflation factor (GIF) was 1.05. Imputation was carried out using Impute version 1, and the HapMap release 22 haplotypes as a reference. Statistical analysis was carried out using SNPTEST, assuming an additive model and taking genotype uncertainty into account.

### **COPSAC**

The COPSAC birth cohort study is a prospective clinical study of a birth cohort of 411 infants born to mothers with a history of asthma. The newborns were enrolled at the age of 1 month, the recruitment of which was previously described in detail<sup>13-15</sup>. The study was approved by the Ethics Committee for Copenhagen (KF 01-289/96) and The Danish Data Protection Agency (2008-41-1754) and informed consent was obtained from both parents. The families used doctors employed at the clinical research unit, and not the family practitioner, for diagnosis and treatment of AD and other skin-related symptoms. Skin lesions were described at both scheduled visits at 6-monthly intervals and acute visits with skin symptoms according to pre-defined morphology and localization; AD was defined based on the Hanifin-Rajka criteria as previously detailed<sup>16-18</sup>.

High throughput genome-wide SNP genotyping were performed using the Illumina Infinium™ II HumanHap550 v1, v3 or quad BeadChip platform (Illumina, San Diego), at the Children's Hospital of Philadelphia's Center for Applied Genomics, as described previously<sup>19</sup>.

Statistical analysis was carried out using SNPTEST, assuming an additive model and taking genotype uncertainty into account.

### **Danish National Birth Cohort (DNBC)**

DNBC is a population-based cohort of more than 100,000 pregnancies, recruited in the years 1996-2002<sup>20</sup>. Extensive phenotype information was collected by computer-assisted telephone interviews twice during pregnancy as well as 6 and 18 months after delivery. An additional questionnaire-based follow-up survey was conducted when the children reached 7 years of age. Cases with early onset AD were identified from the 18 months telephone interview data using an algorithm specifically developed for this purpose<sup>21</sup>. In addition, children with a positive response to both of the following two questions from the 7 year survey were included in the case group: 1) "Has a doctor ever said that your child had AD, also known as allergic rash?" and 2) "Has your child ever had an itchy rash which was coming and going for at least 6 months?". Finally, children with ICD10 diagnosis code L20 in the Danish Hospital Discharge Register were also included in the case group. Controls were required not to have any AD or AD symptoms recorded in interview, questionnaire, or register data. GWAS data were generated for 3,840 individuals from the DNBC (mothers and their children) in a study of prematurity and its complications (Principal investigator Jeff Murray) within the Gene Environment Association Studies (GENEVA) consortium. AD information and genome-wide genotype and imputed data were available for 1,641 children. Imputation was carried out with MACH, using HapMap CEU release 22 as the reference panel. Logistic regression analysis for AD was performed with MACH2DAT, using imputed allele dosages and including sex as a covariate.

The DNBC study protocol was approved by the Danish Scientific Ethical Committee and the Danish Data Protection Agency.

## **ECRHS**

Details of the methods of ECRHS I and ECRHS II, a multicentre international cohort study, have been published elsewhere<sup>22,23</sup>. Participants within the ECRHS were eligible for inclusion in this analysis if they were identified by random sampling of those who fulfilled the following criteria 1) lived in centres that took part in genome-wide genotyping initiative under the auspices of GABRIEL<sup>7</sup> AND 2) were initially selected to take part in the ECRHS clinical measurements as part of the random sample (ie not specifically selected for inclusion because of any pre-existing disease). Cases were those answering positively to the questions 'Have you ever had an itchy rash that was coming and going for at least 6 months?' AND yes to 'Have you had this itchy rash in the last 12 months?' during ECRHS II (aged 27-58). Further information on the distribution of eczema within the cohort is available<sup>24</sup>.

Genotyping and imputation was carried out within the GABRIEL consortium, details in BAMSE methods (page S5). Genome-wide association analysis of AD was carried out in ProbABEL regressing expected allelic dosage on case-control status, adjusted for sex, recruitment centre and first two principal components informative of European ancestry.

Each participating centre obtained ethical permission from the appropriate local committee.

## **Generation R**

The Generation R Study is a population-based prospective cohort study of pregnant women and their children from fetal life onwards in Rotterdam, The Netherlands<sup>25,26</sup>. All children were born between April 2002 and January 2006, and currently followed until young adulthood. Of all eligible children in the study area, 61% were participating in the study at birth<sup>26</sup>. Cord blood samples including DNA have been collected at birth. Postnatal data about eczema was annually collected by questionnaires at the ages of 1 to 5 years. Response rates for the questionnaires were 71%, 76%, 72%, 73% and 74%, respectively<sup>26</sup>. For the current study, 1,115 children were included in the discovery analysis (males, n = 594 (53%)). A total number of 620 children were available for the replication analyses (males, n = 299 (48%)). Questions about eczema were 'Has your child in the past 12 months had eczema [yes, saw a doctor; Yes, but did not see a doctor; No, did not have] (age 1 to 4 years)?' and 'Has your child ever had eczema [yes; no] (age 5)?'. We defined cases as those children of whom parents answered their child 'Yes, had eczema and saw a doctor' or 'Yes, ever had eczema'. We defined controls as those children of whom parents answered their child 'No, never had eczema' and 'Yes, had eczema but did not see a doctor/No, did not have eczema'. The current study used the first set of Generation R samples of Northern European Ancestry. Samples were genotyped using Illumina Infinium II HumanHap610 Quad Arrays following standard manufacturer's protocols. Intensity files were analyzed using the Beadstudio Genotyping Module software v.3.2.32 and genotype calling based on default cluster files. Any sample displaying call rates below 97.5%, excess of autosomal heterozygosity ( $F < \text{mean} - 4\text{SD}$ ) and mismatch between called and phenotypic



gender were excluded. In addition, individuals identified as genetic outliers by the IBS clustering analysis (> 3 standard deviations away from the HapMap CEU population mean) and one of 2 pairs of identical twins (IBD probabilities =1) were excluded from the analysis. After quality control (QC) 2,729 children were included in the analyses. Genotypes were imputed for all polymorphic SNPs from phased haplotypes in autosomal chromosomes of the HapMap CEU Phase II panel (release 22, build 36) oriented to the positive (forward) strand. Genotyped SNPs with minor allele frequency < 0.01, SNP Call Rate < 0.98 and HWE P-value <  $1 \times 10^{-6}$  were filtered. After marker pruning 503,248 SNPs were used for imputation (MACH v 1.0.16) of 2,543,887 SNPs. Association analysis for directly genotyped data were carried out in PLINK implemented on BCSNPmax and for imputed data were ran using MACH2DAT implemented in the GRIMP<sup>27</sup> user interface platform. The study protocol was approved by the Medical Ethical Committee of the Erasmus Medical Centre, Rotterdam (MEC 217.595/2002/20). Written informed consent was obtained from all participants.

### **Genetics of Overweight Young Adults (GOYA) women's study**

In total, 91,387 pregnant women were recruited to the Danish National Birth Cohort during 1996-2002, 67,853 of whom gave birth to a live born infant and had provided a blood sample during pregnancy. The GOYA study includes a subset of these women, selected for genome-wide genotyping according to their BMI and is described in full elsewhere<sup>28,29</sup>. The 4% (2,451) of the women with the largest residuals from the regression of BMI on age and parity and a random sample of similar size (2,450) drawn from the remaining distribution were selected for genotyping. Pertinent to this study, the women were asked questions about eczema during a telephone interview at ~16 weeks of gestation. The questions were:

1. Have you ever had any skin disease?
2. Was the skin disease diagnosed by a doctor?
3. What kind of skin disease?

Cases were defined as those that answered "yes" to Qs 1 and 2, and 'AD' to Q3. Controls were defined as those that answered "no" to Q1.

The GOYA study was approved by the regional scientific ethics committee and by the Danish Data Protection Board.

Genome-wide genotyping on the Illumina 610k quad chip was carried out at the Centre National de Génotypage (CNG), Evry, France. We excluded SNPs with minor allele frequency <1%, >5% missing genotypes or which failed an exact test of Hardy-Weinberg equilibrium (HWE) in the controls ( $p < 10^{-7}$ ). We also excluded any individual who did not cluster with the CEU individuals (Utah residents with ancestry from northern and western Europe) in a multidimensional scaling analysis seeded with individuals from the International HapMap release 22, who had >5% missing data, outlying heterozygosity of >35% or <30.2%, both samples in the case of genetic duplicates, one of each pair of genetically related individuals, individuals with sex discrepancies and individuals whose genotyping was discordant with a previous project. After data cleaning, 3,908 women and 545,349 SNPs remained. We carried out imputation to HapMap release 22 (CEU individuals) using Mach 1.0, Markov Chain Haplotyping<sup>3,4</sup>.

Logistic genome-wide association analysis for AD (with no covariates) was carried out in MACH2DAT<sup>3,4</sup>.

### **The Danish Glostrup Cohort (Health2006)**

Between June 2006 and May 2008, a cross-sectional study was performed in the general population in Copenhagen, the Capital of Denmark. A random sample of 7931 subjects aged 18–69 years old was obtained from the Danish Central Personal Register, Ministry of Internal Affairs. All were Danish adults with Danish citizenship and born in Denmark. A total of 3471 (44%) subjects participated in a general health examination and 3329 (95.9%) responded to the question about atopic dermatitis. The participation rate was higher among older age-groups than among younger age groups in both genders<sup>30</sup>. The Ethical Committee of Copenhagen County approved the study (KA-20060011). A written informed consent form was obtained from all participants prior to the beginning of the study.

All participants were mailed a standard invitation letter and a questionnaire about health, lifestyle, and socioeconomic factors. AD was defined by the U.K. Working Party's diagnostic criteria for atopic dermatitis as a history of an itchy skin condition plus a minimum of two of four minor criteria<sup>31</sup>.

Genotyping of SNPs was performed by the PCR KASPar genotyping system (KBiosciences, Hoddesdon, UK). None of the SNPs deviated from HW equilibrium ( $p > 0.05$  for all SNPs). Lowest call rate for SNPs was 0.98.

Data analyses were performed using the Statistical Products and Service Solutions package (SPSS Inc., Chicago, IL, U.S.A.) for Windows (release 15.0).

### **KORA**

The Cooperative Health Research in the Region of Augsburg (KORA) study is a series of independent population-based epidemiological surveys and follow-up studies of participants living in the region of Augsburg, Southern Germany<sup>32</sup>. All participants are of German nationality identified through the registration office and informed consent has been given by all participants. The study has been approved by the local ethics committee. Participants were examined in 1994/95 (KORA S3) or 1999/2001 (KORA S4) and in the follow-up examinations in 2004/05 (KORA F3) and 2006/08 (KORA F4). All KORA subjects had completed a standardized questionnaire which next to demographic data included the basis allergy questions of the European Community Respiratory Health Survey (ECRHS) on respiratory health<sup>22</sup>. AD was diagnosed based on a reported physician's diagnosis in the past. For the genome-wide association study we genotyped 1,644 randomly selected participants of KORA F3 using Affymetrix 500K and 1,814 randomly selected participants of KORA F4 using Affymetrix 6.0<sup>33</sup>. Genome-wide association analysis of AD was carried out using logistic regression in SNPTEST V2 (<http://www.stats.ox.ac.uk/~marchini/software/gwas/snptest.html>), including sex as a covariate.

For replication purpose 1100 AD cases of self-reported German ethnicity were obtained from the GENEVA (Genetic evaluation of atopic dermatitis) study from the Department of Dermatology and Allergy, Technical

University Munich<sup>34</sup>. AD was diagnosed on the basis of a skin examination by experienced dermatologists according to standard criteria in the presence of a chronic or chronically relapsing pruritic dermatitis with the typical morphology and distribution<sup>35</sup>. KORA controls were selected of the remaining KORA F4 sample which was not included in the GWAS analysis. De novo replication analysis was carried with R 2.12.2 (<http://www.R-project.org>) using logistic regression adjusted for sex. Genetic information entered the model as allele counts.

## **LISA/GINI**

The influence of Life-style factors on the development of the Immune System and Allergies in East and West Germany PLUS the influence of traffic emissions and genetics (LISApplus) Study is a population based birth cohort study. A total of 3097 healthy, fullterm neonates were recruited between 1997 and 1999 in Munich, Leipzig, Wesel and Bad Honnef. The participants were not pre-selected based on family history of allergic diseases<sup>36</sup>.

A total of 5991 mothers and their newborns were recruited into the German Infant study on the influence of Nutrition Intervention PLUS environmental and genetic influences on allergy development (GINIplus) between September 1995 and June 1998 in Munich and Wesel. Infants with at least one allergic parent and/or sibling were allocated to the interventional study arm investigating the effect of different hydrolysed formulas for allergy prevention in the first year of life<sup>37</sup>. All children without a family history of allergic diseases and children whose parents did not give consent for the intervention were allocated to the non-interventional arm. Detailed descriptions of the LISApplus and GINIplus studies have been published elsewhere<sup>36</sup> and<sup>37</sup>, respectively).

Information on ever having physician-diagnosed AD was collected using self-administered questionnaires completed by the parents. The questionnaires were completed at 6, 12, 18 and 24 months and 4, 5, 6 years of age in the LISApplus study and 1, 2, 3, 4 and 6 years in the GINIplus study asking for each year of age since the previous follow-up. DNA was collected at the age 6 and 10 years. For both studies, approval by the local Ethics Committees and written consent from participant's families were obtained.

In the discovery analysis, 379 children from the LISApplus study from Munich were included (number of boys: 227 (57%)). DNA was analysed using the Affymetrix Human SNP Array 5.0 for each individual. Genome-wide data was called using BRLMM-P algorithm and imputed in IMPUTE<sup>38</sup>.

Genome-wide association analysis of AD was carried out in SNPTTEST V1 (<http://www.stats.ox.ac.uk/~marchini/software/gwas/snptest.html>) regressing expected allelic dosage on case-control status, including sex as a covariate.

For replication, 665 children from Munich from both studies were included (499 (75%) children from the GINIplus study and 166 (25%) children from the LISApplus study). 583 individuals (499 from the GINIplus study and 84 from the LISA study) were analysed using the Affymetrix Human SNP Array 5.0 and 82 individuals from the LISApplus study were analysed using Affymetrix Human SNP Array 6.0. Genotypes were called using BRLMM-P algorithm (5.0), respectively BIRDSEED V2 algorithm (6.0), imputed in IMPUTE2<sup>39</sup> and genome-wide

association analysis of AD was carried out in SNPTEST V2 (<http://www.stats.ox.ac.uk/~marchini/software/gwas/snptest.html>) regressing expected allelic dosage on case-control status, including sex as a covariate.

### **Manchester Asthma and Allergy Study (MAAS)**

The Manchester Asthma and Allergy Study is an unselected, population-based prospective study which follows the development of atopic disorders in a cohort of children described in detail elsewhere<sup>40-44</sup>. The setting is the maternity catchment area of Wythenshawe and Stepping Hill Hospitals, comprising of 50 square miles of South Manchester and Cheshire, UK, a stable mixed urban-rural population. Study was approved by the Local Research Ethics Committee. Informed consent was obtained from all parents.

#### Screening & Recruitment

All pregnant women were screened for eligibility at antenatal visits (8th-10th week of pregnancy). The study was explained to the parents, and informed consent for initial questionnaires and skin prick testing was obtained. Both parents completed a questionnaire about their and their partner's history of asthma and allergic diseases and smoking habits.

If the pregnant woman's partner was not present at the antenatal clinic visit, an invitation was sent for him to attend an open-access evening clinic for skin prick testing and questionnaire. Once both parents had completed questionnaires and skin prick testing, a full explanation of the proposed future follow-up for the child was given. Of the 1499 couples who met the inclusion criteria (<10 weeks of pregnancy, maternal age >18 years, questionnaire and skin test data available for both parents), 288 declined to take part in the study. A total of 1185 participants had at least some evaluable data.

#### Follow-up

The children have been followed prospectively, and attended review clinics at ages 1, 3, 5 and 8 years ( $\pm 4$  weeks).

#### Definitions of outcomes

*AD*: Information on the age of onset of parentally-reported AD was collected using an interviewer-administered validated ISAAC questionnaire to collect information on parentally reported symptoms, physician-diagnosed illnesses and treatments received.

In this analysis eczema was defined as a positive answer to the question "Has your child ever suffered from eczema?". The association study was carried out in the 761 MAAS individuals for which both genotype and phenotype data was available.

#### Genotyping

DNA samples were genotyping on an illumina 610 quad chip. The illumina genotypes were called using the Illumina GenCall application following the manufacturer's instructions. Quality control criteria for samples

included: 97% call rate, exclusion of samples with an outlier autosomal heterozygosity (scree-plot visualisation) gender validation and sequenome genotype concordance. Quality control criteria for SNPs included a 95% call rate,  $HWE > 5.9 \times 10^{-7}$ , minor allele frequency  $> 0.005$ . Genotypes were imputed with IMPUTE version 2.1.2 with 1000 genomes and hapmap phase 3 reference genotypes. Association analysis was carried out using SNPTEST version 2.1 using frequentist with the score method.

### **The Norwegian Mother and Child Cohort Study (MoBa)**

The Norwegian Mother and Child Cohort Study (MoBa) is a prospective population-based pregnancy cohort study conducted by the Norwegian Institute of Public Health<sup>45,46</sup>. Participants were recruited from all over Norway from 1999-2008, and 38.5% of invited women consented to participate. The cohort now includes 108,000 children, 90,700 mothers and 71,500 fathers. Blood samples were obtained from both parents during pregnancy and from mothers and children (umbilical cord) at birth. Follow-up is conducted by questionnaires at regular intervals and by linkage to national health registries.

The current study is based on version 4 of the quality-assured data files and included participants that were recruited between 1999-2005. Informed consent was obtained from each MoBa participant upon recruitment. The study was approved by The Regional Committee for Medical Research Ethics in South-Eastern Norway and the Norwegian Data Inspectorate.

The cases were indentified from questionnaires at the child's age 6, 18 and 36 months defined by the following questions: Does your child have or has he/she had any of the following health problems? Atopic eczema was listed as one of several items here. If yes was entered on the first question, a second were asked: has the mother and child health care centre or someone else referred your child for further specialist investigation Our cases were restricted to unique cases across age 6, 18 and 36 months with yes on both questions. Consequently the controls were unique controls across age 6, 18 and 36 months with no on both questions.

The genotype platform used were Illumina 660W and imputed SNPs were only included if the met the recommended threshold for imputation quality (PLINK INFO  $> 0.8$ ). Logistic regression analyses for AD was performed using an additive model in PLINK, including sex as a covariate. The children included in this study are originally genotyped for a case control study (n=1200 children) of spontaneous preterm delivery.

### **The Northern Finland Birth Cohort 1966 (NFBC66)**

The Northern Finland Birth Cohort 1966 is a prospective follow-up study of children from the two northernmost provinces of Finland<sup>47</sup>. Women with expected delivery dates in 1966 were recruited through maternity health centres<sup>48</sup>. Cohort members living in northern Finland or in the capital area were invited to a clinical examination as well as questionnaire at age 31 years. DNA was extracted from blood samples given at the clinical examination<sup>49</sup>. For the purpose of this meta-analysis, we included data from the following questions:

1. Have you had eczema (infantile, atopic or allergic)?
2. If yes, have you ever been treated by a doctor

Individuals who answered yes to both questions were defined as cases (1208). Individuals that answered no to the first question were defined as controls (2294). Genotyping was completed at the Broad Institute Biological Sample Repository in participants with available DNA using Illumina HumanCNV370DUO Analysis BeadChip array for 339,629 SNPs. We excluded 3,345 SNPs from analysis because HWE was not met at a level  $p < 0.0001$ , 55 because of low call rate ( $< 95\%$ ) and 7,681 because the MAF was  $< 1\%$ , leaving 329,091 SNPs for the association analysis. Imputation was conducted using the algorithm implemented in IMPUTE and association analysis using quicktest<sup>50</sup>. Informed consent for the use of the data including DNA was obtained from all subjects. The study was approved by the ethics committees in Oulu (Finland) and Oxford (UK) universities in accordance with the Declaration of Helsinki.

#### **Northern Finland Birth Cohort 1986 (NFBC86)**

The Northern Finland Birth Cohort 1986 comprises 9432 live-born children with an expected date of birth between July 1, 1985, and June 30, 1986 from the two northernmost provinces of Finland, Oulu and Lapland. The cohort covers over 99% of all the deliveries in the target area during that time (N=9,362 mothers with N=9,432 liveborn children)<sup>51</sup>. At the age of 16, the cohort members were sent a postal questionnaire including questions on eczema, and 80% returned it. At the same time, they were invited to a clinical examination with 74% taking part in it. DNA was extracted from blood samples given at the clinical examination for 6,266 subjects. For the purpose of this meta-analysis, we included data from 1717 individuals that answered the following questions:

1. Have you ever had eczema which has been called infantile eczema, atopic eczema or allergic eczema?
2. Diagnosed or treated by a doctor?

Individuals who answered yes to both questions were defined as cases (316). Individuals that answered no to the first question were defined as controls (1401). Genotyping was performed by KBiosciences (Hoddesdon) using their own system of fluorescence-based competitive allele-specific PCR (KASPar) with genotype success rate  $> 97\%$ . Association analysis was conducted using quicktest<sup>50</sup>. Informed consent for the use of the data including DNA was obtained from all subjects at the age of 16 years. The study was approved by ethics committees in Oulu (Finland) university in accordance with the Declaration of Helsinki.

#### **Netherlands Twin Register (NTR)**

The Netherlands Twin Register (NTR) is a large population based study that registers approximately 40% of all multiple births in the Netherlands since 1986<sup>52</sup>. At age 5 of the children, a survey is sent out in which the

parents of the twins are asked to indicate for each child separately whether a doctor has ever diagnosed eczema. A similar question concerns doctor diagnosed baby eczema<sup>53</sup>.

Blood and/or buccal samples for DNA extraction were collected for a subsample of the NTR in several projects. Genotyping was performed on the Affymetrix Human SNP Array 6.0 in the Avera Institute, Sioux Falls, South Dakota (USA). Genotypes were called using the BIRDSEED V2 algorithm and imputed in BEAGLE in the MD Anderson Cancer Center, Houston, Texas (USA). After QC, one individual of each family was selected. If both twins were cases or controls, one individual was picked at random, otherwise the case was selected. A total of 123 cases and 306 controls were included in the study. Logistic regression analyses were performed using an additive model in PLINK, including sex as a covariate. The study was approved by the Medical Ethical Committee of the VU Medical Centre, Amsterdam, the Netherlands (IRB00002991).

### **PIAMA**

PIAMA is a birth cohort study consisting of two parts: a placebo controlled intervention study in which the effect of mite impermeable mattress covers was studied and a natural history study in which no intervention took place. Details of the study design have been published previously<sup>54</sup>. Recruitment took place in 1996-1997. A screening questionnaire was distributed to pregnant women visiting one of 52 prenatal clinics at three regions in the Netherlands. A total of 10,232 pregnant women completed a validated screening questionnaire. Mothers reporting a history of asthma, current hay fever or allergy to pets or house dust mite were defined as allergic. Based on this screening, 7862 women were invited to participate, of whom 4,146 women (1327 allergic and 2819 nonallergic) gave written informed consent. The response rates to the annual questionnaires ranged from 3030 (92%) at age 1 to 2732 (83%) at age 8 years. DNA was collected from 2162 children at age 4 and/or 8 years. Genome-wide genotyping was performed within the framework of the Gabriel Consortium<sup>7</sup>. For this, DNA samples from 213 children with parental reported doctor diagnosed asthma ever at age 8 years and from 213 controls without doctor diagnosed asthma or wheeze ever at age 8 years were provided. From these children, 186 cases of eczema and 167 controls were selected for the current study. Cases of eczema were defined as parental reported doctor diagnosed eczema ever at age 2 years or doctor diagnosed eczema in the last 12 months at ages 3, 4, 5, 6, 7 or 8 years. Controls were defined as children whose parents denied the presence of doctor diagnosed eczema in the last 12 months at all ages. Genotyping was performed with an Illumina Human610 quad array. SNPs were excluded that fulfilled one or more of the following criteria: p-value for test of Hardy-Weinberg equilibrium  $\leq 1E-7$ , genotyping call rate <95% or MAF < 1%. SNPs were imputed with IMPUTE version 2 software using HAPMAP CEU release #22 b36. Genome-wide association analyses were performed using SNPTEST version 1.1.5. The Medical Ethical Committees of the participating institutes approved the study.

### **QIMR discovery cohort**

We recently performed a GWAS of asthma in 2,832 unrelated individuals of European ancestry ascertained from the Australian population as described in detail elsewhere<sup>55</sup>. Of these, 2,148 individuals (34% males, mean age 32 years, range 10 to 92) reported information on their AD status in health questionnaires, including

482 individuals who reported having had AD at any point in their lifetime (32% diagnosed by a doctor) and 1,666 AD-free controls. Genotyping was performed with Illumina 610K or 370K arrays and stringent quality control filters applied as described in Supplementary Table 2. Imputation of HapMap 2 SNPs (CEU release 21) was performed with MACH and SNPs tested for association with disease status using logistic regression in PLINK, with sex included as a covariate. Participants provided informed consent to participate in this study, which was approved by the QIMR ethics committee.

### **Western Australian Pregnancy (Raine) cohort**

Recruitment of the Western Australian Pregnancy (Raine) cohort has previously been described in detail<sup>56-58</sup>. In brief, between 1989 and 1991 2,900 pregnant women were recruited prior to 18-weeks gestation into a randomised controlled trial to evaluate the effects of repeated ultrasound in pregnancy. Recruitment predominantly took place at King Edward Memorial Hospital (Perth, Western Australia). Women were randomised to repeat ultrasound measurements at 18, 24, 28, 34 and 38 weeks gestation or to a regular ultrasound assessment at 18-weeks. Children have been comprehensively phenotyped from birth to 21 years of age (average ages of one, two, three, six, eight, ten, 14, 17 and currently 21) by trained members the Raine research team. Data collection included questionnaires completed by the child's primary carer and by the adolescent from age 14, physical assessments by trained assessors at all follow up years, DNA collection from the year 14 follow-up. Information on ever having AD diagnosed by a paediatrician or GP was collected using a questionnaire at 6 and 8 years of age. The study was conducted with appropriate institutional ethics approval, and written informed consent was obtained from all mothers and the children from age 18-years. The cohort has been shown to be representative of the population presenting to the antenatal tertiary referral centre in Western Australia<sup>56</sup>. Genotyping was performed using the Illumina 660w quad array and imputation of HapMap 2 (CEU release 22) SNPs was performed using MACH. Association testing was performed using MACH2DAT.

### **SAPALDIA**

SAPALDIA data are derived from among 6,055 SAPALDIA cohort subjects that participated in both, the baseline (1991) and follow-up (2002) examinations and agreed to providing blood for genetic analysis.

SAPALDIA is a population-based cohort that originally recruited subjects aged 18 to 60 from population registries in eight Swiss communities representing the three largest language groups (German, French, Italian) as well as different levels of air pollution, altitude and degrees of urbanization<sup>59,60</sup>. At both baseline and follow-up examination subjects underwent spirometry as well as a detailed interview on respiratory health and allergies, smoking history, lifestyle factors and anthropometry. At follow-up, 8,047 of 9,651 baseline subjects re-participated in at least one part of the study and a formal biobank was established. AD was defined as positive answer to the question "Have you ever had atopic dermatitis or any other kind of skin allergy?" at either examination. The basis for this study formed control subjects and a random sample of all asthmatics (sampled proportionally to the overall asthma prevalence in the study) that were part of a nested asthma case-



control sample subjected for genomewide genotyping in the context of the GABRIEL genome-wide association study on asthma<sup>7</sup>. Genotyping and imputation was carried out within the GABRIEL consortium, details in BAMSE methods (page S5).

Association analysis was performed in ProbABEL. All study participants gave written informed consent, and the study was approved by the national and respective cantonal ethics committees.

### **The Department of Twin Research and Genetic Epidemiology at King's College London**

#### **(TwinsUK)**

The TwinsUK adult twin registry based at St Thomas' Hospital in London is a volunteer cohort of over 12,000 identical and non-identical twins<sup>61</sup> recruited since 1993. The cohort is predominantly female (92%). Twins largely volunteered unaware of the study in which they would subsequently be included, gave fully informed consent under a protocol reviewed by the St Thomas' Hospital Local Research Ethics Committee.

Subjects were genotyped using Illumina's Human Hap 300k Duo and Human Hap610 Quad. Genotyping was performed in part at the Wellcome Trust Sanger Institute (Hinxton, UK) and in part at the Center for Inherited Disease Research, NIH, Baltimore, MD, United States. Genotypes were quality controlled and were excluded from the analysis for low genotype rate defined as less than 95% for alleles with a minor allele frequency (MAF) of 0.05 and above or less than 99% for loci with a MAF of 0.05 or below or for Hardy-Weinberg disequilibrium ( $p < 0.0001$ ). Individual samples were included in the analysis if they were of non-admixed Caucasian descent, did not show lack or excess heterozygosity, had high (defined as in excess of 99% success rate) individual genotypes available.

Genotypes were imputed using IMPUTE 2.0 using Linkage Disequilibrium patterns observed in the HapMap 2 CEU population as a template. A total of 1,236 unrelated subjects for which both genetic and phenotypic information was available was analyzed using PLINK.

## Collaborating Consortia Members

### AAGC - Australian Asthma Genetics Consortium

Graham Jones<sup>1</sup>, Patrick Danoy<sup>2</sup>, Svetlana Baltic<sup>3</sup>, Desiree Mészáros<sup>4</sup>, Catherine Hayden<sup>5</sup>, Sarah E Medland<sup>6</sup>, Andrew J. Kemp<sup>7</sup>, Faang Cheah<sup>3</sup>, Dale R. Nyholt<sup>6</sup>, Melissa C. Southey<sup>8</sup>, Mary Roberts<sup>9</sup>, Scott D. Gordon<sup>6</sup>, Euan R. Tovey<sup>1</sup>, Loren Price<sup>3</sup>, Margaret J. Wright<sup>6</sup>, James Markos<sup>10</sup>, Anjali K. Henders<sup>6</sup>, Graham Giles<sup>11</sup>, Li P. Chung<sup>3</sup>, Paul S. Thomas<sup>12</sup>, Ian Feather<sup>13</sup>, Pamela A. Madden<sup>14</sup>, Suzanna Temple<sup>3</sup>, Stephen Morrison<sup>15</sup>, Chalermchai Mitrpant<sup>3</sup>, Brad Shelton<sup>3</sup>, Andrew C. Heath<sup>14</sup>, Mark Jenkins<sup>2</sup>, Warwick J. Britton<sup>16</sup>, John L. Hopper<sup>17</sup>, Stephen R. Leeder<sup>18</sup>, Haydn Walters<sup>4</sup>, Michael J. Abramson<sup>19</sup>, Colin F. Robertson<sup>9</sup>, Matthew A Brown<sup>2</sup>, Guy B. Marks<sup>1</sup>, Shyamali C. Dharmage<sup>17</sup>

<sup>1</sup> Woolcock Institute of Medical Research, University of Sydney, Sydney, Australia.

<sup>2</sup> University of Queensland Diamantina Institute, Princess Alexandra Hospital, Brisbane, Australia.

<sup>3</sup> Lung Institute of WA and Centre for Asthma, Allergy and Respiratory Research, University of WA, Perth, Australia.

<sup>4</sup> Menzies Research Institute, Hobart, Australia.

<sup>5</sup> School of Paediatrics and Child Health, Princess Margaret Hospital for Children, Perth, Australia.

<sup>6</sup> The Queensland Institute of Medical Research, Brisbane, Australia.

<sup>7</sup> The Children's Hospital, Westmead, Sydney, Australia.

<sup>8</sup> Department of Pathology, The University of Melbourne, Melbourne, Australia.

<sup>9</sup> Department of Respiratory Medicine, Royal Children's Hospital, Parkville, Australia.

<sup>10</sup> Launceston General Hospital, Launceston, Australia.

<sup>11</sup> Cancer Epidemiology Centre, The Cancer Council Victoria, Melbourne, Australia.

<sup>12</sup> Faculty of Medicine, University of New South Wales, Sydney, Australia.

<sup>13</sup> Gold Coast Hospital, Southport, Australia.

<sup>14</sup> Washington University School of Medicine, St Louis, United States.

<sup>15</sup> University of Queensland, Brisbane, Australia.

<sup>16</sup> Centenary Institute of Cancer Medicine & Cell Biology, Royal Prince Alfred Hospital, Camperdown, Australia.

<sup>17</sup> Centre for Molecular, Environmental, Genetic and Analytic Epidemiology, University of Melbourne, Melbourne, Australia.

<sup>18</sup> Australian Health Policy Institute, University of Sydney, Sydney, Australia.

<sup>19</sup> Department of Epidemiology & Preventive Medicine, Monash University, Melbourne, Australia.

### GOYA - Genetics of Overweight Young Adults

Lavinia Paternoster<sup>1,2</sup>, David M. Evans<sup>1,2</sup>, Ellen Aagaard Nohr<sup>3</sup>, Claus Holst<sup>4</sup>, Mark Lathrop<sup>5,6</sup>, Nicholas J. Timpson<sup>1,2</sup>, George Davey Smith<sup>1,2</sup>, Thorkild I. A. Sørensen<sup>4</sup>

<sup>1</sup> MRC CAiTE centre, University of Bristol, Bristol, United Kingdom.

<sup>2</sup> School of Social and Community Medicine, University of Bristol, Bristol, United Kingdom.

<sup>3</sup> Institute of Public Health, Aarhus University, Aarhus, Denmark.

<sup>4</sup> Institute of Preventive Medicine, Copenhagen University Hospitals, Copenhagen, Denmark.

<sup>5</sup> Centre National de Génotypage, Evry, France.

<sup>6</sup> Foundation Jean Dausset, CEPH, Paris, France.

## **Acknowledgements**

### **ALSPAC**

We are extremely grateful to all the families who took part in this study, the midwives for their help in recruiting them, and the whole ALSPAC team, which includes interviewers, computer and laboratory technicians, clerical workers, research scientists, volunteers, managers, receptionists, and nurses.

### **COPSAC**

We thank all the families participating in the COPSAC cohort for their effort and commitment; Kirsten Hinsby Mathiesen, Lotte Klansø, Lena Vind and the rest of the COPSAC study team.

### **DNBC**

The GENEVA consortium (<https://www.genevastudy.org/>) supported the genotyping in DNBC.

### **Generation R**

The Generation R Study is conducted by the Erasmus Medical Center in close collaboration with the School of Law and Faculty of Social Sciences of the Erasmus University Rotterdam, the Municipal Health Service Rotterdam area, Rotterdam, the Rotterdam Homecare Foundation, Rotterdam and the Stichting Trombosedienst & Artsenlaboratorium Rijnmond (STAR-MDC), Rotterdam. We gratefully acknowledge the contribution of children and parents, general practitioners, hospitals, midwives and pharmacies in Rotterdam. The generation and management of GWAS genotype data for the Generation R Study was done at the Genetic Laboratory of the Department of Internal Medicine, Erasmus MC, The Netherlands. We would like to thank Karol Estrada, Dr. Tobias A. Knoch, Anis Abuseiris, Luc V. de Zeeuw, and Rob de Graaf, for their help in creating GRIMP, and BigGRID, MediGRID, and Services@MediGRID/D-Grid, (funded by the German Bundesministerium fuer Forschung und Technology; grants 01 AK 803 A-H, 01 IG 07015 G) for access to their grid computing resources. We thank Pascal Arp, Mila Jhamai, Marijn Verkerk, Lizbeth Herrera and Marjolein Peters for their help in creating, managing and QC of the GWAS database. Also, we thank Karol Estrada and Carolina Medina-Gomez for their support in creation and analysis of imputed data.

## **Health2006**

Professor Jeanne Duus Johansen participated in the study design.

## **LISA/GINI**

LISApplus Study:

The study team wishes to acknowledge the following: Helmholtz Zentrum Muenchen - German Research Center for Environment and Health, Institute of Epidemiology I, Neuherberg (Heinrich J, Wichmann HE, Sausenthaler S, Chen C-M); University of Leipzig, Department of Pediatrics (Borte M), Department of Environmental Medicine and Hygiene (Herbarth O); Department of Pediatrics, Marien-Hospital, Wesel (von Berg A); Bad Honnef (Schaaf B); UFZ-Centre for Environmental Research Leipzig-Halle, Department of Environmental Immunology (Lehmann I); IUF – Leibniz Research Institute for Environmental Medicine, Düsseldorf (Krämer U); Department of Pediatrics, Technical University, Munich (Bauer CP, Hoffman U).

GINIplus Study:

The study team wishes to acknowledge the following: Helmholtz Zentrum Muenchen - German Research Center for Environmental Health, Institute of Epidemiology I, Munich (Heinrich J, Wichmann HE, Sausenthaler S, Chen C-M, Thiering E, Tiesler C, Standl M, Schnappinger M, Rzehak P); Department of Pediatrics, Marien-Hospital, Wesel (Berdel D, von Berg A, Beckmann C, Groß I); Department of Pediatrics, Ludwig Maximilians University, Munich (Koletzko S, Reinhardt D, Krauss-Etschmann S); Department of Pediatrics, Technical University, Munich (Bauer CP, Brockow I, Grübl A, Hoffmann U); IUF – Leibniz Research Institute for Environmental Medicine, Düsseldorf (Krämer U, Link E, Cramer C); Centre for Allergy and Environment, Technical University, Munich (Behrendt H).

## **MoBa**

We are grateful to all the participating families in Norway who take part in this ongoing cohort study.

## **NFBC66 and NFBC86**

We thank Professor Paula Rantakallio (launch of NFBC1966 and 1986), Ms Outi Tornwall and Ms Minttu Jussila (DNA biobanking).

## **NTR**

We thank all twin families for their participation in the NTR and acknowledge Toos van Beijsterveldt and Meike Bartels (phenotype collection); Eco de Geus, Gonneke Willemsen and Jim Hudziak (study design); Erik Ehli and Gareth Davies (DNA processing and genotyping); and Paul Scheet and Xiao Xiangjun (genotype calling and imputation) for their contributions.

## **QIMR**

We thank the twins and their families for their participation; Dixie Statham, Ann Eldridge, Marlene Grace, Kerrie McAloney (sample collection); Lisa Bowdler, Steven Crooks (DNA processing); David Smyth, Harry Beeby, Daniel Park (IT support).

## **RAINE**

The authors are grateful to the Raine Study participants and their families, and to the Raine Study research staff for cohort coordination and data collection.

## **SAPALDIA**

Current SAPALDIA Team

Study directorate: T Rochat (p), , JM Gaspoz (c), N Künzli (e/exp), LJS Liu (exp), NM Probst Hensch (e/g), C Schindler (s).

Scientific team: JC Barthélémy (c), W Berger (g), R Bettschart (p), A Bircher (a), G Bolognini (p), O Brändli (p), C Brombach (n), M Brutsche (p), L Burdet (p), M Frey (p), U Frey (pd), MW Gerbase (p), D Gold (e/c/p), E de Groot (c), W Karrer (p), R Keller (p), B Knöpfli (p), B Martin (pa), D Miedinger (o), U Neu (exp), L Nicod (p), M Pons (p), F Roche (c), T Rothe (p), E Russi (p), P Schmid-Grendelmeyer (a), A Schmidt-Trucksäss (pa), A Turk (p), J Schwartz (e), D. Stolz (p), P Straehl (exp), JM Tschopp (p), A von Eckardstein (cc), E Zemp Stutz (e).

Scientific team at coordinating centers: M Adam (e/g), E Boes (g), PO Bridevaux (p), D Carballo (c), E Corradi (e), I Curjuric (e), J Dratva (e), A Di Pasquale (s), L Grize (s), D Keidel (s), S Kriemler (pa), A Kumar (g), M Imboden (g), N Maire (s), A Mehta (e), F Meier (e), H Phuleria (exp), E Schaffner (s), GA Thun (g) A Ineichen (exp), M Ragettli (e), M Ritter (exp), T Schikowski (e), G Stern (pd), M Tarantino (s), M Tsai (e), M Wanner (pa) (a) allergology, (c) cardiology, (cc) clinical chemistry, (e) epidemiology, (exp) exposure, (g) genetic and molecular biology, (m) meteorology, (n) nutrition, (o) occupational health, (p) pneumology, (pa) physical activity, (pd) pediatrics, (s) statistics

## **Acknowledgements**

The study could not have been done without the help of the study participants, technical and administrative support and the medical teams and field workers at the local study sites. Local fieldworkers : Aarau: S Brun, G Giger, M Sperisen, M Stahel, Basel: C Bürli, C Dahler, N Oertli, I Harreh, F Karrer, G Novicic, N Wyttenbacher, Davos: A Saner, P Senn, R Winzeler, Geneva: F Bonfils, B Blicharz, C Landolt, J Rochat, Lugano: S Boccia, E Gehrig, MT Mandia, G Solari, B Viscardi, Montana: AP Bieri, C Darioly, M Maire, Payerne: F Ding, P Danieli A Vonnez, Wald: D Bodmer, E Hochstrasser, R Kunz, C Meier, J Rakic, U Schafroth, A Walder.

Administrative staff: C Gabriel, R Gutknecht.

## **TWINS UK**

We thank the staff from the Genotyping Facilities at the Wellcome Trust Sanger Institute for sample preparation, Quality Control and Genotyping led by Leena Peltonen and Panos Deloukas; Le Centre National de

Génotypage, France, led by Mark Lathrop, for genotyping; Duke University, North Carolina, USA, led by David Goldstein, for genotyping; and the Finnish Institute of Molecular Medicine, Finnish Genome Center, University of Helsinki, led by Aarno Palotie.

## **Funding**

### **AAGC**

The NHMRC (including grant 613627), Asthma Foundations in Tasmania, Queensland and Victoria, The Clifford Craig Trust in Northern Tasmania, Lew Carty Foundation, Royal Hobart Research Foundation and the University of Melbourne, Cooperative Research Centre for Asthma, New South Wales Department of Health, Children's Hospital Westmead, University of Sydney. Contributions of goods and services were made to the CAPS study by Allergopharma Joachim Ganzer KG Germany, John Sands Australia, Hasbro, Toll refrigerated, AstraZeneca Australia, and Nu-Mega Ingredients Pty Ltd. Goods were provided at reduced cost to the CAPS study by Auspharm, Allersearch and Goodman Fielder Foods. MCM, SCD and MAB are supported by the NHMRC Fellowship Scheme.

### **ALSPAC**

The UK Medical Research Council (Grant ref:74882), the Wellcome Trust (Grant ref: 076467), and the University of Bristol provide core support for the Avon Longitudinal Study of Parents and their Children (ALSPAC). L.Paternoster and D.M.Evans were supported by a Medical Research Council New Investigator Award (MRC G0800582 to DME). J.P.Kemp is funded by a Wellcome Trust 4-year PhD studentship in molecular, genetic, and life course epidemiology (WT083431MA).

The Sample Logistics and Genotyping Facilities at the Wellcome Trust Sanger Institute and 23andMe generated the ALSPAC GWA data. The Wellcome Trust and Swiss National Science Foundation funded the expression data.

### **BAMSE**

BAMSE was funded by the Swedish Research Council, Stockholm County Council, Centre for Allergy Research, Karolinska Institutet, GABRIEL contract number 018996 under Integrated Program LSH-2004-1.2.5-1 and the Wellcome Trust [WT084703MA]. EM has received post doc grants from the Swedish Heart Lung Foundation, the Swedish Fulbright Commission and Riksbankens Jubileumsfond - Erik Rönnberg Scholarship.

### **B58C**

We acknowledge use of phenotype and genotype data from the British 1958 Birth Cohort DNA collection, funded by the Medical Research Council grant G0000934 and the Wellcome Trust grant 068545/Z/02. (<http://www.b58cgene.sgul.ac.uk/>). Genotyping for the B58C-WTCCC subset was funded by the Wellcome Trust grant 076113/B/04/Z. The B58C-T1DGC genotyping utilized resources provided by the Type 1 Diabetes Genetics Consortium, a collaborative clinical study sponsored by the National Institute of Diabetes and Digestive and Kidney Diseases (NIDDK), National Institute of Allergy and Infectious Diseases (NIAID), National Human Genome Research Institute (NHGRI), National Institute of Child Health and Human Development (NICHD), and Juvenile Diabetes Research Foundation International (JDRF) and supported by U01 DK062418. B58C-T1DGC GWAS data were deposited by the Diabetes and Inflammation Laboratory, Cambridge Institute

for Medical Research (CIMR), University of Cambridge, which is funded by Juvenile Diabetes Research Foundation International, the Wellcome Trust and the National Institute for Health Research Cambridge Biomedical Research Centre; the CIMR is in receipt of a Wellcome Trust Strategic Award (079895). The B58C-GABRIEL genotyping was supported by a contract from the European Commission Framework Programme 6 (018996) and grants from the French Ministry of Research.

### **CHOP**

This research was supported in part by the PA research grant- 4100042728 from the state of Pennsylvania and an Institute Development Award from the Children's Hospital of Philadelphia.

### **COPSAC**

COPSAC is funded by: the Lundbeck Foundation, the Danish Council for Strategic Research, the Augustinus Foundation, the Pharmacy Foundation, the Danish Agency for Science, Technology and Innovation, the EU Seventh Framework Programme, Ronald McDonald House Charities, the Global Excellence in Health award Programme, the Danish Medical Research Council, the Director K. GAD and family Foundation, the A. P. Møller og Hustru Chastine Mc-Kinney Møller General Purpose Foundation, the Aage Bang Foundation, the Health Insurance Foundation, the East Danish Medical Research Council, the Copenhagen City Council Research Foundation, the Kai and Gunhild Lange Foundation, the Dagmar Marshall Foundation, the Ville Heise legacy, the Region of Copenhagen, the Ib Henriksen foundation, the Birgit and Svend Pock-Steen foundation, the Danish Ministry of the Interior and Health's Research Centre for Environmental Health, the Gerda and Aage Hensch foundation, the Rosalie Petersens Foundation, the Hans and Nora Buchard Foundation, the Gangsted Foundation, the Danish Medical Association, Asthma-Allergy Denmark, the Danish Otolaryngology Association, the Oda Pedersen legacy, the Højmosegaard Legacy, the A. P. Møller og Hustru Chastine Mc-Kinney Møller Foundation for the advancement of Medical Knowledge, the Jacob and Olga Madsen Foundation, the Aase and Einar Danielsen Foundation, and Queen Louise's Children's Hospital Research Foundation.

The funding agencies did not have any role in study design, data collection and analysis, decision to publish, or preparation of the manuscript.

### **DNBC**

The DNBC was established with the support of a major grant from the Danish National Research Foundation. Additional support for the DNBC has been obtained from the Danish Pharmacists' Fund, the Egmont Foundation, the March of Dimes Birth Defects Foundation, the Augustinus Foundation and the Health Fund of the Danish Health Insurance Societies. The generation of GWAS genotype data for the DNBC samples was carried out within the GENEVA consortium with funding provided through the NIH Genes, Environment and Health Initiative (GEI) (U01HG004423). Assistance with phenotype harmonization and genotype cleaning, as well as with general study coordination, was provided by the GENEVA Coordinating Center (U01HG004446). Genotyping was performed at Johns Hopkins University Center for Inherited Disease Research, with support from the NIH GEI (U01HG004438).



## ECRHS

### Funding acknowledgements

The co-ordination of ECRHS II was supported by the European Commission, as part of their Quality of Life programme.

The genotyping was funded through the EU funded GABRIEL initiative - GRANT Number 018996

The following bodies funded the local studies in ECRHS II:

### Funding sources

Financial support for ECRHS II: Albacete: Fondo de Investigaciones Santarias (FIS) (grant code: 97/0035-01, 99/0034-01 and 99/0034-02), Hospital Universitario de Albacete, Consejería de Sanidad; Barcelona: SEPAR, Public Health Service (grant code: R01 HL62633-01), Fondo de Investigaciones Santarias (FIS) (grant code: 97/0035-01, 99/0034-01 and 99/0034-02) CIRIT (grant code: 1999SGR 00241) Red Respira ISCII; CIBER Epidemiología y Salud Pública (CIBERESP), Spain Basel: Swiss National Science Foundation, Swiss Federal Office for Education & Science, Swiss National Accident Insurance Fund (SUVA), USC NIEHS Center grant 5P30 ES07048; Bergen: Norwegian Research Council, Norwegian Asthma & Allergy Association (NAAF), Glaxo Wellcome AS, Norway Research Fund; Erfurt: Helmholtz Center Munich - National Research Centre for Environment & Health, Deutsche Forschungsgemeinschaft (DFG) (grant code FR 1526/1-1); Galdakao: Basque Health Dept; Grenoble: Programme Hospitalier de Recherche Clinique-DRC de Grenoble 2000 no. 2610, Ministry of Health, Direction de la Recherche Clinique, CHU de Grenoble, Ministère de l'Emploi et de la Solidarité, Direction Générale de la Santé, Comité des Maladies Respiratoires de l'Isère; Hamburg: Helmholtz Center Munich - National Research Centre for Environment & Health, Deutsche Forschungsgemeinschaft (DFG) (grant code MA 711/4-1); Ipswich and Norwich: Asthma UK (formerly known as National Asthma Campaign); Huelva: Fondo de Investigaciones Santarias (FIS) (grant code: 97/0035-01, 99/0034-01 and 99/0034-02); Oviedo: Fondo de Investigaciones Santarias (FIS) (grant code: 97/0035-01, 99/0034-01 and 99/0034-02); Paris: Ministère de l'Emploi et de la Solidarité, Direction Générale de la Santé, UCB-Pharma (France), Aventis (France), Glaxo France, Programme Hospitalier de Recherche Clinique-DRC de Grenoble 2000 no. 2610, Ministry of Health, Direction de la Recherche Clinique, CHU de Grenoble; Tartu: Estonian Science Foundation; Umeå: Swedish Heart Lung Foundation, Swedish Foundation for Health Care Sciences & Allergy Research, Swedish Asthma & Allergy Foundation, Swedish Cancer & Allergy Foundation; Uppsala: Swedish Heart Lung Foundation, Swedish Foundation for Health Care Sciences & Allergy Research, Swedish Asthma & Allergy Foundation, Swedish Cancer & Allergy Foundation.

Financial support for ECRHS I: Ministère de la Santé, Glaxo France, Institut Pneumologique d'Aquitaine, Contrat de Plan Etat-Région Languedoc-Roussillon, CNMATS, CNMRT (90MR/10, 91AF/6), Ministre délégué de la santé, RNSP, France; Helmholtz Center Munich, and the Bundesminister für Forschung und Technologie, Bonn, Germany; Norwegian Research Council project no. 101422/310; Ministerio Sanidad y Consumo FIS (grants

#91/0016060/00E-05E and #93/0393), and grants from Hospital General de Albacete, Hospital General Juan Ramón Jiménez, Consejería de Sanidad Principado de Asturias, Spain; The Swedish Medical Research Council, the Swedish Heart Lung Foundation, the Swedish Association against Asthma and Allergy; Swiss National Science Foundation grant 4026-28099; National Asthma Campaign, British Lung Foundation, Department of Health, South Thames Regional Health Authority, UK.

### **Generation R**

The Generation R Study is made possible by financial support from the Erasmus Medical Center, Rotterdam, the Erasmus University Rotterdam, the Netherlands Organization for Health Research and Development (ZonMw), the Netherlands Organisation for Scientific Research (NWO), the Ministry of Health, Welfare and Sport and the Ministry of Youth and Families. Dr. Liesbeth Duijts received funding by means of a European Respiratory Society / Marie Curie Joint Research Fellowship (nr. MC 1226-2009) under grant agreement RESPIRE, PCOFUND-GA-2008-229571. Dr. Vincent Jaddoe received additional grants from the Netherlands Organization for Health Research and Development (ZonMw 90700303, 916.10159).

### **GOYA**

The genotyping for GOYA was funded by the Wellcome Trust (WT 084762). GOYA was conducted as part of the activities of the Danish Obesity Research Centre (DanORC, [www.danorc.dk](http://www.danorc.dk)) and the MRC centre for Causal Analyses in Translational Epidemiology (MRC CAiTE). L.Paternoster, who conducted the GOYA genotyping QC, imputation and analysis is supported by a Medical Council New Investigator Award (MRC G0800582) awarded to D.M.Evans.

### **Health2006**

The Danish Board of Health, The Danish Environmental Protection Agency, The Copenhagen County Research Foundation, The Velux Foundation, ALK-Abello A/S, Denmark and The Danish Scientific Research Council. None of the funders had any influence on the design, data collection, analysis or interpretation of data.

### **KORA/GENEVA**

The KORA research platform was initiated and financed by the Helmholtz Center Munich, German Research Center for Environmental Health, which is funded by the German Federal Ministry of Education and Research (BMBF) and by the State of Bavaria. Part of this work was financed by the German National Genome Research Network (NGFN-2 and NGFNPlus: 01GS0823). S.W. is supported by grants of the DFG (grant WE 2678/6-1 and WE 2678/8-1), the BMBF as part of the NGFN (01GS 0818), and the Christiane Kühne Center for Allergy Research and Education (<http://www.ck-care.ch/>). The work of S.W. is further supported by the Graduate School of Information Science in Health of the Technische Universität München (TUM-GSISH), the Munich Center of Health Sciences (MC Health) as part of LMUinnovativ, and the COST action "Skinbad".

### **LISA/GINI**

Personal and financial support by the Munich Center of Health Sciences (MCHEALTH) as part of the Ludwig-Maximilians University Munich LMU innovative is gratefully acknowledged.

#### **MAAS**

MAAS was supported by the Asthma UK Grants No 301 (1995-1998), No 362 (1998-2001), No 01/012 (2001-2004), No 04/014 (2004-2007) and The Moulton Charitable Foundation (2004-current); age 11 years clinical follow-up is funded by the Medical Research Council (MRC) Grant G0601361.

#### **MoBa**

The Norwegian Mother and Child Cohort Study is supported by the Norwegian Ministry of Health and the Ministry of Education and Research, NIH/NIEHS (contract no NO-ES-75558), NIH/NINDS (grant no.1 UO1 NS 047537-01), and the Norwegian Research Council/FUGE (grant no. 151918/S10 and no 183220/S10), Norwegian Research Council, Oslo, Norway (FUGE 183220/S10). Swedish government grants to researchers in public health service (ALF) (ALFGBG-136431), Sahlgrenska University Hospital, Sahlgrenska Academy, Gothenburg, Sweden, Swedish Medical Society, Stockholm, Sweden (2008-21198) an Jane and Dan Olsson Research Foundation, Gothenburg, Sweden.

#### **NFBC66 and NFBC86**

Financial support was received from the Academy of Finland (project grants 104781, 120315 and Center of Excellence in Complex Disease Genetics), University Hospital Oulu, Biocenter, University of Oulu, Finland, the European Commission (EURO-BLCS, Framework 5 award QL61-CT-2000-01643), NHLBI grant 5R01HL087679-02 through the STAMPEED program (1RL1MH083268-01), NIH/NIMH (5R01MH63706:02), ENGAGE project and grant agreement HEALTH-F4-2007-201413, and the Medical Research Council (G0500539, PrevMetSyn/SALVE). The DNA extractions, sample quality controls, biobank up-keeping and aliquotting was performed in the National Public Health Institute, Biomedicum Helsinki, Finland and supported financially by the Academy of Finland and Biocentrum Helsinki. A. Couto Alves acknowledges the European Commission, Framework 7, grant number 223367. Jess L Buxton acknowledges the Wellcome Trust fellowship grant, number WT088431MA.

#### **NTR**

Genotyping was supported by Genomics of Developmental Trajectories in Twins (1RC2MH089995-01). The NTR studies were supported by grants from the European Research Council (ERC-230374); NWO: the Netherlands Organization for Scientific Research (NWO/SPI 56-464-14192 and NWO 480-04-004) and ZonMw: the Netherlands Organisation for Health Research and Development.

#### **PIAMA**

The PIAMA study is supported by the Dutch Asthma Foundation (grant 3.4.01.26, 3.2.06.022, 3.4.09.081 and 3.2.10.085CO), the ZonMw (a Dutch organization for health research and development; grant 912-03-031), and the ministry of the environment.

Genome-wide genotyping was funded by the European Commission as part of GABRIEL (A multidisciplinary study to identify the genetic and environmental causes of asthma in the European Community) contract number 018996 under the Integrated Program LSH-2004-1.2.5-1 Post genomic approaches to understand the molecular basis of asthma aiming at a preventive or therapeutic control.

#### **QIMR**

Funding was provided by the Australian National Health and Medical Research Council (NHMRC; grants 241944, 339462, 389927, 389875, 389891, 389892, 389938, 442915, 442981, 496739, 552485, 552498), the Australian Research Council (A7960034, A79906588, A79801419, DP0770096, DP0212016, DP0343921), the FP-5 GenomEUtwin Project (QLG2-CT-2002-01254) and the U.S. National Institutes of Health (NIH grants AA07728, AA07535, AA10248, AA11998, AA13320, AA13321, AA13326, AA14041, DA12854, MH66206). A portion of the genotyping on which this study was based (Illumina 370k scans on 4300 individuals) was carried out at the Center for Inherited Disease Research, Baltimore (CIDR) through an access award to our late colleague Dr. Richard Todd (Psychiatry, Washington University School of Medicine, St Louis).

#### **RAINE**

The authors gratefully acknowledge the NH&MRC for their long term contribution to funding the study over the last 20 years and also the following Institutions for providing funding for Core Management of the Raine Study: The University of Western Australia (UWA) Raine Medical Research Foundation UWA, Faculty of Medicine, Dentistry and Health Sciences, The Telethon Institute for Child Health Research Women and Infants Research Foundation. The authors gratefully acknowledge the assistance of the Western Australian DNA Bank (National Health and Medical Research Council of Australia National Enabling Facility). The authors also acknowledge the support of the National Health and Medical Research Council of Australia (Grant ID 572613 and ID 003209) and the Canadian Institutes of Health Research (Grant ID 166067).

#### **SAPALDIA**

Research support: the Swiss National Science Foundation (grants no 33CSCO-108796, 3247BO-104283, 3247BO-104288, 3247BO-104284, 3247-065896, 3100-059302, 3200-052720, 3200-042532, 4026-028099, 3233-054996, PDFMP3-123171), the Federal Office for Forest, Environment and Landscape, the Federal Office of Public Health, the Federal Office of Roads and Transport, the canton's government of Aargau, Basel-Stadt, Basel-Land, Geneva, Luzern, Ticino, Zurich, the Swiss Lung League, the canton's Lung League of Basel Stadt/ Basel Landschaft, Geneva, Ticino and Zurich, SUVA, Freiwillige Akademische Gesellschaft, UBS Wealth Foundation, Talecris Biotherapeutics GmbH, Abbott Diagnostics, European Commission 018996 (GABRIEL), Wellcome Trust WT 084703MA

## **TWINS UK**

Twins UK (TUK): The study was funded by the Wellcome Trust and the European Community's Seventh Framework Programme. The study also receives support from the Dept of Health via the National Institute for Health Research (NIHR) comprehensive Biomedical Research Centre award to Guy's & St Thomas' NHS Foundation Trust in partnership with King's College London. TDS is an NIHR senior Investigator. The project also received support from a *Biotechnology and Biological Sciences Research Council* (BBSRC) project grant. (G20234). DG is supported by an MRC fellowship. PH is supported by a Marie Curie Fellowship. The authors acknowledge the funding and support of the National Eye Institute via an NIH/CIDR genotyping project (PI: Terri Young)

Genotyping of TwinsUK samples: Genotyping was also performed by CIDR as part of an NEI/NIH project grant.

**Supplementary Table 1. Study characteristics - discovery & replication**

| Cohort                   | Type                    | N    | Percent male | Mean age @ interview          | Atopic dermatitis question                                                                    | Physician diagnosis required | Case response                                        | case #         | Control response                                       | control # |
|--------------------------|-------------------------|------|--------------|-------------------------------|-----------------------------------------------------------------------------------------------|------------------------------|------------------------------------------------------|----------------|--------------------------------------------------------|-----------|
| <b>Discovery cohorts</b> |                         |      |              |                               |                                                                                               |                              |                                                      |                |                                                        |           |
| <b>ALSPAC</b>            | Birth cohort            | 2811 | 50%          | 81m, 91m, 103m, 10y, 13y, 14y | 1. Has your child in the past 12 months had eczema?                                           |                              | 1. Yes, and saw a Dr                                 |                |                                                        |           |
|                          |                         |      |              | 10y, 14y                      | 2. Has a doctor ever actually said that your child has eczema?                                |                              | 2. Yes                                               | 2. No (@ 14 y) |                                                        |           |
|                          |                         |      |              |                               |                                                                                               | yes                          | Yes to 1 or 2 at any timepoint                       | 909            |                                                        | 1902      |
| <b>B58C-WTCCC</b>        | Birth cohort            | 1285 | 50%          | 7y                            | 1. Parent interview: History of atopic dermatitis in first year?                              |                              | 1. Yes                                               |                |                                                        |           |
|                          |                         |      |              | 7y                            | 2. Parent interview: History of atopic dermatitis after first year?                           |                              | 2. Yes                                               |                |                                                        |           |
|                          |                         |      |              | 7y                            | 3. Medical examination                                                                        |                              |                                                      |                |                                                        |           |
|                          |                         |      |              |                               |                                                                                               | no                           | Yes to 1 or 2                                        | 103            | No to 1 and 2 and 3                                    | 1182      |
| <b>B58C-T1DGC</b>        | Birth cohort            | 2186 | 48%          | 7y                            | 1. Parent interview: History of atopic dermatitis in first year?                              |                              | 1. Yes                                               |                |                                                        |           |
|                          |                         |      |              | 7y                            | 2. Parent interview: History of atopic dermatitis after first year?                           |                              | 2. Yes                                               |                |                                                        |           |
|                          |                         |      |              | 7y                            | 3. Medical examination                                                                        |                              |                                                      |                |                                                        |           |
|                          |                         |      |              |                               |                                                                                               | no                           | Yes to 1 or 2                                        | 188            | No to 1 and 2 and 3                                    | 1998      |
| <b>CHOP</b>              | Population based cohort | 1523 | 51%          | 9y                            | ICD9 diagnosis in electronic medical record                                                   | yes                          |                                                      | 519            |                                                        | 1004      |
| <b>COPSAC</b>            | Birth cohort            | 332  | 49%          | 0-6y                          | Diagnosis prospectively by dermatologist at the research unit based on Hanifin-Rajka criteria | yes                          | Diagnosed atopic dermatitis                          | 171            | No atopic dermatitis diagnosis and followed up to 6 yr | 161       |
| <b>DNBC</b>              | Birth cohort            | 1641 | 52%          | 18m                           | 1. Has your child had itchy rash?                                                             |                              | 1. Yes                                               |                |                                                        |           |
|                          |                         |      |              | 18m                           | 2. Has a doctor told you that your child had atopic dermatitis?                               |                              | 2. Yes                                               |                |                                                        |           |
|                          |                         |      |              | 18m                           | 3. Was the rash recurrent?                                                                    |                              | 3. Yes                                               |                |                                                        |           |
|                          |                         |      |              | 18m                           | 4. In which 0.5 month periods did your child have the rash?                                   |                              | 4. Rash for at least 4 consecutive 0.5-month periods |                |                                                        |           |

|                     |                           |      |     |                   |                                                                                                                          |     |                                                                                                               |      |                                                                             |      |  |
|---------------------|---------------------------|------|-----|-------------------|--------------------------------------------------------------------------------------------------------------------------|-----|---------------------------------------------------------------------------------------------------------------|------|-----------------------------------------------------------------------------|------|--|
|                     |                           |      |     | 18m               | 5. Where was the rash located?                                                                                           |     | 5. Localization in elbow creases, behind the knees, face, wrists/hands or generalized/4 or more localizations |      |                                                                             |      |  |
|                     |                           |      |     | 7y                | 6. Has your child ever had atopic dermatitis?                                                                            |     | 6. Yes                                                                                                        |      |                                                                             |      |  |
|                     |                           |      |     | 7y                | 7. Has your child ever had an itchy rash which was coming and going for at least 6 months?                               |     | 7. Yes                                                                                                        |      |                                                                             |      |  |
|                     |                           |      |     |                   | 9. Hospital Discharge Record of ICD10 code L20                                                                           | no  | [Yes to 1 or 2 and Yes to 3 or 4 and 5] or [Yes to 6 and 7] or 9                                              | 225  | No AD or AD symptoms recorded in interview, questionnaire, or register data | 1416 |  |
| <b>Generation R</b> | Birth cohort              | 1115 | 53% | 1y, 2y, 3y, 4y    | 1. Has your child had atopic dermatitis in the last 12 months for which he/she attended a general practitioner/hospital? |     |                                                                                                               |      |                                                                             |      |  |
|                     |                           |      |     | 5y                | 2. Has your child ever had atopic dermatitis?                                                                            | no  | Yes to 1 (at any timepoint) or 2                                                                              | 676  | No to 1 and 2                                                               | 439  |  |
| <b>GOYA</b>         | Mothers from birth cohort | 3359 | 0%  | 29y               | 1. Have you ever had any skin disease?                                                                                   | yes | Yes to 1 and 2 and 'atopic dermatitis' to 3                                                                   | 180  | No to 1                                                                     | 3179 |  |
|                     |                           |      |     |                   | 2. Was the skin disease diagnosed by a doctor?                                                                           |     |                                                                                                               |      |                                                                             |      |  |
|                     |                           |      |     |                   | 3. What kind of skin disease?                                                                                            |     |                                                                                                               |      |                                                                             |      |  |
| <b>KORA F3</b>      | Cohort study              | 1375 | 49% | 61y               | 1. Did a physician ever diagnose you with atopic eczema?                                                                 | yes | Yes                                                                                                           | 42   | No                                                                          | 1333 |  |
| <b>KORA F4</b>      | Cohort study              | 1791 | 49% | 61y               | 1. Did you ever have atopic dermatitis/eczema?                                                                           |     |                                                                                                               |      |                                                                             |      |  |
|                     |                           |      |     |                   | 2. If yes, was it diagnosed by a physician?                                                                              | yes | Yes to 1 and 2                                                                                                | 101  | No to 1 or 2                                                                | 1690 |  |
| <b>LISA</b>         | Birth cohort              | 379  | 57% | 6m, 12m, 18m, 24m | 1. Did a physician diagnose your child having atopic dermatitis in the past 6 months?                                    |     | 1. Yes                                                                                                        |      |                                                                             |      |  |
|                     |                           |      |     | 4y, 5y, 6y        | 2. Did a physician diagnose your child having atopic dermatitis in the past 12 months?                                   | yes | Yes to 1 or 2 at any timepoint                                                                                | 93   | No to all of the time points                                                | 286  |  |
| <b>NFBC66</b>       | Birth cohort              | 3502 | 47% | 31y               | 1. Have you had eczema (infantile, atopic or allergic)?                                                                  |     | 1. Yes                                                                                                        |      |                                                                             |      |  |
|                     |                           |      |     |                   | 2. if yes, have you ever been treated by a doctor                                                                        | yes | Yes to 1 and 2                                                                                                | 1208 | No to 1                                                                     | 2294 |  |

|                 |                         |                                                 |     |                             |                                                                                                                                                                                                           |                                                                    |                                                   |                                                                                                                                                                         |      |                   |
|-----------------|-------------------------|-------------------------------------------------|-----|-----------------------------|-----------------------------------------------------------------------------------------------------------------------------------------------------------------------------------------------------------|--------------------------------------------------------------------|---------------------------------------------------|-------------------------------------------------------------------------------------------------------------------------------------------------------------------------|------|-------------------|
| <b>PIAMA</b>    | Birth cohort            | 353                                             | 53% | 3m,1y,2y,3y,4y,5y,6y,7y,8y  | 1. Has your child ever had atopic dermatitis?                                                                                                                                                             | 1. Yes                                                             | 186                                               | No to 1 and 2 and 3 at ages 2-8                                                                                                                                         | 167  |                   |
|                 |                         |                                                 |     | 2y,3y,4y,6y,7y,8y           | 2. Did a doctor ever diagnose atopic dermatitis in your child?                                                                                                                                            | 2. Yes                                                             |                                                   |                                                                                                                                                                         |      |                   |
|                 |                         |                                                 |     | 2y,3y,4y,6y,7y,8y           | 3. Did your child have atopic dermatitis during the past 12 months?                                                                                                                                       | 3. Yes                                                             |                                                   |                                                                                                                                                                         |      |                   |
|                 |                         |                                                 |     |                             | yes                                                                                                                                                                                                       | Yes to 1 and 2 and 3                                               |                                                   |                                                                                                                                                                         |      |                   |
| <b>RAINE</b>    | Birth cohort            | 1135                                            | 53% | 5y                          | 1. Do you think your child has ever had atopic dermatitis? Has anyone ever told you your child has atopic dermatitis? [yes and who (paediatrician, GP, child health nurse, naturopath, friend, relative)] | 1. Yes                                                             | 245                                               | No to 1 and 2 (subject excluded in case of missing). subjects who answered 'Yes' to 1 and were diagnosed to someone other than a paediatrician/GP were coded as missing | 890  |                   |
|                 |                         |                                                 |     | 8y                          | 2. Has your child had atopic dermatitis in the last 12 month?                                                                                                                                             |                                                                    |                                                   |                                                                                                                                                                         |      |                   |
|                 |                         |                                                 |     |                             |                                                                                                                                                                                                           | yes                                                                | Yes to 1 and were diagnosed by a paediatrician/GP |                                                                                                                                                                         |      |                   |
| <b>QIMR</b>     | Population based cohort | 2148<br>(adolescent=765, asthma=55, adult=1328) | 34% | Mean=32, SD=15, range=10-92 | 1. Adolescent/Asthma study: Have you (your child) ever had eczema confirmed by a doctor?                                                                                                                  | 1. Yes                                                             | 482                                               | No to 1 or 2                                                                                                                                                            | 1666 |                   |
|                 |                         |                                                 |     |                             | 2. Adult study: How often have you had any eczema? ["Only as a child", "Quite often", "Sometimes", "Often", "Never"]                                                                                      | 2. Yes to "Only as a child", "Quite often", "Sometimes" or "Often" |                                                   |                                                                                                                                                                         |      | 2. Yes to "Never" |
|                 |                         |                                                 |     |                             |                                                                                                                                                                                                           | no                                                                 | Yes to 1 or 2                                     |                                                                                                                                                                         |      |                   |
| <b>Twins UK</b> | cohort study            | 1236                                            | 8%  | 46 years                    | 1. Have you ever had eczema?                                                                                                                                                                              | no                                                                 | Yes                                               | 278                                                                                                                                                                     | No   | 958               |



**Replication cohorts**

| <b>Replication cohorts</b> |                         |       |              |                               |                                                                                           |     |                                |     |                           |      |
|----------------------------|-------------------------|-------|--------------|-------------------------------|-------------------------------------------------------------------------------------------|-----|--------------------------------|-----|---------------------------|------|
| <b>AAGC</b>                |                         | 3881  | 49%          | Mean=35, SD=17, range=3-89    |                                                                                           |     |                                |     |                           |      |
|                            | Population base cohort  | QIMR  |              |                               | 1. QIMR study: Have you (your child) ever had eczema confirmed by a doctor?               | yes | 1. Yes                         | 241 | 1. No                     | 2891 |
|                            | Birth cohort            | CAPS  |              |                               | 2. CAPS study: Has your child ever had eczema confirmed by a doctor?                      | yes | 2. Yes                         | 28  | 2. No                     | 25   |
|                            | Population based cohort | LIWA  |              |                               |                                                                                           |     |                                | 0   |                           | 474  |
|                            | Birth cohort            | MESCA |              |                               |                                                                                           |     |                                | 0   |                           | 64   |
|                            | Birth cohort            | TAHS  |              |                               |                                                                                           |     |                                | 0   |                           | 158  |
|                            |                         |       |              |                               |                                                                                           | yes | Yes to 1 or 2 at any timepoint | 269 |                           | 3612 |
| <b>ALSPAC</b>              | Birth cohort            | 2903  | 50%          | 81m, 91m, 103m, 10y, 13y, 14y | 1. Has your child in the past 12 months had eczema?                                       |     | 1. Yes, and saw a Dr           |     |                           |      |
|                            |                         |       |              | 10y, 14y                      | 2. Has a doctor ever actually said that your child has eczema?                            |     | 2. Yes                         |     | 2. No (@ 14 y)            |      |
|                            |                         |       |              |                               |                                                                                           | yes | Yes to 1 or 2 at any timepoint | 895 |                           | 2008 |
| <b>BAMSE</b>               | Birth cohort            | 346   | Cases: 62%   | 1y, 2y, 4y, 8y                | 1. Has a doctor diagnosed your child as having atopic dermatitis after the age of x year  |     | 1. Yes                         |     |                           |      |
|                            |                         |       | Controls:48% | 1y                            | 2. Has a doctor ever diagnosed your child as having atopic dermatitis up to 1 year of age |     | 2. Yes                         |     |                           |      |
|                            |                         |       |              |                               |                                                                                           | yes | Yes to 1 and/or 2              | 100 | No to both Q at all times | 246  |
| <b>B58C-REPL</b>           | Birth cohort            | 2090  | 51.3%        | 7y                            | 1. Parent interview: History of atopic dermatitis in first year?                          |     | 1. Yes                         |     |                           |      |
|                            |                         |       |              | 7y                            | 2. Parent interview: History of atopic dermatitis after first year?                       |     | 2. Yes                         |     |                           |      |
|                            |                         |       |              | 7y                            | 3. Medical examination                                                                    |     |                                |     |                           |      |

|                     |                                                                           |      |        |                |                                                                                                                                                                                                                                                                                                                                                                                                                                     |    |                                                                                      |     |                                                                       |      |
|---------------------|---------------------------------------------------------------------------|------|--------|----------------|-------------------------------------------------------------------------------------------------------------------------------------------------------------------------------------------------------------------------------------------------------------------------------------------------------------------------------------------------------------------------------------------------------------------------------------|----|--------------------------------------------------------------------------------------|-----|-----------------------------------------------------------------------|------|
|                     |                                                                           |      |        |                |                                                                                                                                                                                                                                                                                                                                                                                                                                     | no | Yes to 1 or 2                                                                        | 170 | No to 1 and 2 and 3                                                   | 1920 |
| <b>ECRHS</b>        | Population based cohort study. Information provided is based on follow-up | 1650 | 49.03% | 42.8 (7.1)     | 1. Have you ever had an itchy rash that was coming and going for more than six months?                                                                                                                                                                                                                                                                                                                                              |    | 1. Yes                                                                               |     |                                                                       |      |
|                     |                                                                           |      |        |                | 2. Have you had this itchy rash in the last 12 months?                                                                                                                                                                                                                                                                                                                                                                              |    | 2. Yes                                                                               |     |                                                                       |      |
|                     |                                                                           |      |        |                |                                                                                                                                                                                                                                                                                                                                                                                                                                     | no | Yes to 1 and 2                                                                       | 176 | No to 1 or 2                                                          | 1474 |
| <b>Generation R</b> | Birth cohort                                                              | 620  | 48%    | 1y, 2y, 3y, 4y | 1. Has your child had eczema in the last 12 months for which he/she attended a general practitioner/hospital?                                                                                                                                                                                                                                                                                                                       |    |                                                                                      |     |                                                                       |      |
|                     |                                                                           |      |        | 5y             | 2. Has your child ever had eczema?                                                                                                                                                                                                                                                                                                                                                                                                  |    |                                                                                      |     |                                                                       |      |
|                     |                                                                           |      |        |                |                                                                                                                                                                                                                                                                                                                                                                                                                                     | no | Yes to 1 (at any timepoint) or 2                                                     | 182 | No to 1 and 2                                                         | 438  |
| <b>Health2006</b>   | Population based cohort                                                   | 3329 | 44.7%  | 49.4 years     | The U.K. Working Party's diagnostic criteria for atopic dermatitis as a history of an itchy skin condition plus a minimum of two of four minor criteria were used. The major criteria was an itchy skin condition and the minor criteria were: 1) a history of involvement of the skin creases, 2) a personal history of asthma or hay fever, 3) a history of general dry skin in the last year, 4) onset under the age of 2 years. | no | AD cases according to U.K. Working Party's diagnostic criteria for atopic dermatitis | 337 | non-AD U.K. Working Party's diagnostic criteria for atopic dermatitis | 2992 |
| <b>KORA F4</b>      | Population based controls                                                 | 1100 | 49%    | 25.4           | 1. Did a physician ever diagnose you with atopic dermatitis/eczema?                                                                                                                                                                                                                                                                                                                                                                 |    |                                                                                      |     |                                                                       |      |
|                     |                                                                           |      |        |                | 2. Dermatologic examination, UK Working Party Criteria                                                                                                                                                                                                                                                                                                                                                                              |    |                                                                                      |     |                                                                       |      |
| <b>GENEVA</b>       | Tertiary care cases                                                       | 1100 | 42%    | 49.3           | 1. Did a physician ever diagnose you with atopic dermatitis/eczema?                                                                                                                                                                                                                                                                                                                                                                 |    |                                                                                      |     |                                                                       |      |

|                  |                               |                            |       |                          | 2. Dermatologic examination, UK Working Party Criteria                                                                                                                       | Yes to 1 and actual dermatologist's diagnosis | 1100                            | No to 1 and no actual dermatologist's diagnosis | 1100                         |      |
|------------------|-------------------------------|----------------------------|-------|--------------------------|------------------------------------------------------------------------------------------------------------------------------------------------------------------------------|-----------------------------------------------|---------------------------------|-------------------------------------------------|------------------------------|------|
|                  |                               |                            |       |                          |                                                                                                                                                                              | yes                                           | Yes to 1                        | 1100                                            | No to 2                      | 1100 |
| <b>LISA/GINI</b> | Birth cohort                  | 665 (GINI: 499, LISA: 166) | 51%   | LISA: 6m, 12m, 18m, 24m  | 1. Did a physician diagnose your child having atopic dermatitis in the past 6 months?                                                                                        |                                               | 1. Yes                          |                                                 |                              |      |
|                  |                               |                            |       | LISA: 3y-6y, GINI: 1y-6y | 2. Did a physician diagnose your child having atopic dermatitis in the past 12 months?                                                                                       |                                               | 2. Yes                          |                                                 |                              |      |
|                  |                               |                            |       |                          |                                                                                                                                                                              | yes                                           | Yes to 1 or 2 at any timepoint  | 231                                             | No to all of the time points | 434  |
| <b>MAAS</b>      | Unselected birth cohort       | 761                        | 55%   | 1y, 3y, 5y, 8y           | 1. Has your child ever suffered from atopic dermatitis                                                                                                                       | no                                            | 'Yes' at any timepoint          | 435                                             | No                           | 326  |
| <b>MoBa</b>      | Pregnancy cohort              | 937                        | 51%   | 6m, 18m, 36m             | 1. Does your child have or has he/she had any of the following health problems? (Enter a cross in a box for each item.) Atopic eczema (childhood eczema) - listed as an item |                                               | 1. yes                          |                                                 |                              |      |
|                  |                               |                            |       |                          | 2. If yes, has the mother and child health centre or someone else referred your child for further specialist investigation?                                                  |                                               | 2. yes                          |                                                 |                              |      |
|                  |                               |                            |       |                          |                                                                                                                                                                              | yes                                           | Yes to 1 and 2 at any timepoint | 70                                              | No to all of the time points | 867  |
| <b>NFBC86</b>    | Birth cohort                  | 4465                       | 50%   | 15-16y                   | 1. Have you ever had eczema which has been called infantile eczema, atopic eczema or allergic eczema?                                                                        |                                               |                                 |                                                 |                              |      |
|                  |                               |                            |       |                          | 2. Diagnosed or treated by a doctor?                                                                                                                                         | yes                                           | yes to 1+2                      | 798                                             | no to 1                      | 3667 |
| <b>NTR</b>       | Population based cohort study | 429                        | 50.8% | 5y                       | 1. Did a physician since birth ever diagnosed your children with eczema? (Oldest/youngest answered seperately )                                                              |                                               |                                 |                                                 |                              |      |
|                  |                               |                            |       |                          | 2. Did a physician since birth ever diagnosed your children with baby eczema? (Oldest/youngest answered seperately )                                                         |                                               |                                 |                                                 |                              |      |
|                  |                               |                            |       |                          |                                                                                                                                                                              | yes                                           | Yes to 1 or 2                   | 123                                             | 1. No to 1 and 2             | 306  |

|                 |                                |     |     |                                                                                           |                                                                        |    |                                                    |     |                                                                                                                                    |     |
|-----------------|--------------------------------|-----|-----|-------------------------------------------------------------------------------------------|------------------------------------------------------------------------|----|----------------------------------------------------|-----|------------------------------------------------------------------------------------------------------------------------------------|-----|
| <b>SAPALDIA</b> | Population based cohort study. | 976 | 50% | 2 examinations: baseline in 1991, follow-up in 2002.<br><br>Age (sd) in 2002: 53.2 (11.1) | Have you ever had atopic dermatitis or any other kind of skin allergy? | no | Yes. At either of the 2 examinations (1991 & 2002) | 533 | No' at both examinations<br>'No' at follow-up, if missing at baseline<br>( 'No' at baseline & missing at follow-up set to missing) | 443 |
|-----------------|--------------------------------|-----|-----|-------------------------------------------------------------------------------------------|------------------------------------------------------------------------|----|----------------------------------------------------|-----|------------------------------------------------------------------------------------------------------------------------------------|-----|

---

**Supplementary Table 2. Study genetic & analysis methods (a) discovery and (b) replication cohorts**

| (a)                 | Genotyping                 |                                              | BEFORE IMPUTATION QUALITY CONTROL<br>PER SUBJECT |                     |                           |                           | BEFORE IMPUTATION QUALITY CONTROL<br>PER SNP          |               |                       |               | IMPUTATION                                                                   |                               |                    | DATA ANALYSIS |                      |             |
|---------------------|----------------------------|----------------------------------------------|--------------------------------------------------|---------------------|---------------------------|---------------------------|-------------------------------------------------------|---------------|-----------------------|---------------|------------------------------------------------------------------------------|-------------------------------|--------------------|---------------|----------------------|-------------|
|                     | Cohort                     | Genotyping Platform                          | Genotype-Calling Algorithm                       | call rate threshold | heterozygosity thresholds | ethnicity exclusions      | other exclusion criteria                              | SNP call rate | HWE p-value threshold | MAF threshold | other exclusion criteria                                                     | Imputation Software (Version) | HapMap CEU Release | NCBI Build    | Association Software | GWAS Lambda |
| <b>ALSPAC</b>       | Illumina 317K or 610k      |                                              |                                                  | 0.97                | 0.34 & 0.36               | MDS - eigenstrat adjusted | sex discrepancies, related individuals                | 0.97          | 5E-07                 | 0.005         | no                                                                           | MACH 1.0                      | 22                 | 36            | MACH2DAT             | 1.0068      |
| <b>B58C-WTCCC</b>   | Affymetrix 500             | Chiamo                                       |                                                  | 0.97                | 0.23 & 0.30               | yes                       | external discordance, relatives, gender discrepancies | 0.95          | 1E-04                 | 0.01          | no                                                                           | IMPUTE                        | 21                 | 35            | quicktest            | 1.0088      |
| <b>B58C-T1DGC</b>   | Illumina Infinium 550      | Illuminus                                    |                                                  | 0.98                | no                        | yes                       | external discordance, relatives, gender discrepancies | no            | no                    | no            | multi-allelic SNPs, SNPs with mismatch in alleles between dbSNP and Illumina | MACH                          | 21                 | 35            | probAbel             | 1.0125      |
| <b>CHOP</b>         | Illumina HH 550v1/v3 HH610 | Illumina BeadStudio software                 |                                                  | 0.98                | no                        | yes, non-cauc excluded    | no                                                    | 0.95          | 1E-04                 | 0.01          | no                                                                           | Impute                        | 22                 | 36            | snptest              | 1.05        |
| <b>COPSAC</b>       | Illumina 550K              | BeadStudio v 3.3.4                           |                                                  | 0.98                | no                        | yes                       | no                                                    | 0.95          | 1E-04                 | 0.01          | no                                                                           | IMPUTE v2                     | 22                 | 36            | SNPTEST              | 1.0272      |
| <b>DNBC</b>         | Illumina Human 660w-quad   | BeadStudio Genotyping Module, version 3.3.7  |                                                  | 0.95                | no                        | yes                       | no                                                    | 0.98          | 0.001                 | 0.01          | SNPs where strand issues could not be resolved, e.g., A/T and C/G SNPs       | MACH                          | 22                 | 36            | MACH2DAT             | 1.0051      |
| <b>Generation R</b> | Illumina 610K Quad         | BeadStudio Genotyping Module, version 3.2.32 |                                                  | 0.975               | 3 SD of the mean          | Yes                       | yes (IBD - check: no family relations)                | 0.98          | 1E-06                 | 0.01          | no                                                                           | MACH v1.0.16                  | 22                 | 36            | Plink, MACH2DAT      | 1.0165      |
| <b>GOYA</b>         | Illumina 610k              |                                              |                                                  | 0.95                | 0.3 & 0.35                | MDS                       | sex discrepancies, related individuals                | 0.95          | 1E-07                 | 0.01          | NA                                                                           | MACH                          | 22                 | 36            | MACH2DAT             | 0.9949      |
| <b>KORA F3</b>      | Affymetrix 500K            | BRLMM                                        |                                                  | 0.93                | no                        | german passport           | gender discrepancies                                  | no            | no                    | no            | no                                                                           | IMPUTE                        |                    | 35            | snptest              | 0.9648      |

|                 |                                            |                                                         |      |     |                     |                                                                                                   |      |         |      |                                                                       |              |    |         |           |        |
|-----------------|--------------------------------------------|---------------------------------------------------------|------|-----|---------------------|---------------------------------------------------------------------------------------------------|------|---------|------|-----------------------------------------------------------------------|--------------|----|---------|-----------|--------|
| <b>KORA F4</b>  | Affymetrix Genome-Wide Human SNP Array 6.0 | Birdseed2                                               | 0.93 | no  | german passport     | gender discrepancies                                                                              | no   | no      | no   | no                                                                    | IMPUTE       | 36 | snptest | 0.9997    |        |
| <b>LISA</b>     | Affymetrix Genome-Wide Human SNP Array 5.0 | BRLMM-P                                                 | 0.95 | no  | no                  | no                                                                                                | 0.95 | 0.01    | 0.01 | no                                                                    | IMPUTE v1.06 | 22 | 36      | SNPTEST   | 1.0223 |
| <b>NFBC66</b>   | Illumina HumanCNV370DUO Analysis BeadChip  | Beadstudio                                              | 0.95 | no  | no                  | no phenotype data, IBD, withdrew consent, gender discrepancies, contaminated or duplicate samples | 0.95 | 1E-04   | 0.01 | no                                                                    | IMPUTE v1.0  | 21 | 35      | quicktest | 1.0097 |
| <b>PIAMA</b>    | Illumina Human610 quad array               | GenomeStudio Software                                   | 0.95 | no  | no                  | inconsistent sex                                                                                  | 0.95 | 1E-07   | 0.01 | no                                                                    | IMPUTE v2    | 22 | 36      | snptest   | 1.053  |
| <b>QIMR</b>     | Illumina 610K or CNV370                    | Illumina BeadStudio software                            | 0.95 | no  | yes                 | no                                                                                                | 0.95 | 1E-06   | 0.01 | yes (BeadStudio GenCall score <0.7; SNPs exclusive to 610K or CNV370) | MACH         | 21 | 35      | Plink     | 0.9968 |
| <b>RAINE</b>    | Illumina 660K                              | Illumina's Bead Studio Genotyping Module software v.3.1 | 0.95 | no  | Yes                 | yes - IBD check and exclude family relations, congenital abnormalities                            | 0.95 | 5.7E-07 | 0.01 | no                                                                    | MACH         | 22 | 36      | MACH2DAT  | 0.9931 |
| <b>Twins UK</b> | Illumina 317K (3/5) & 610K (2/5)           | Illuminus                                               | 0.95 | Yes | Yes, only caucasian | no                                                                                                | 0.95 | 1E-04   | 0.01 | no                                                                    | IMPUTE       | 22 | 36      | Plink     | 1.0846 |

(b)

*In silico replication*

| Cohort              | Genotyping                       |                                              | BEFORE IMPUTATION QUALITY CONTROL<br>PER SUBJECT |                             |                      |                                                             | BEFORE IMPUTATION QUALITY CONTROL<br>PER SNP |                       |               |                                                                       | IMPUTATION                    |                                                                              |            | DATA ANALYSIS        |
|---------------------|----------------------------------|----------------------------------------------|--------------------------------------------------|-----------------------------|----------------------|-------------------------------------------------------------|----------------------------------------------|-----------------------|---------------|-----------------------------------------------------------------------|-------------------------------|------------------------------------------------------------------------------|------------|----------------------|
|                     | Genotyping Platform              | Genotype-Calling Algorithm                   | call rate threshold                              | heterozygosity thresholds   | ethnicity exclusions | other exclusion criteria                                    | SNP call rate                                | HWE p-value threshold | MAF threshold | other exclusion criteria                                              | Imputation Software (Version) | HapMap CEU Release                                                           | NCBI Build | Association Software |
|                     |                                  |                                              |                                                  |                             |                      |                                                             |                                              |                       |               |                                                                       |                               |                                                                              |            |                      |
| <b>AAGC</b>         | Illumina 610K or CNV370          | Illumina BeadStudio software                 | 0.95                                             | no                          | yes                  | no                                                          | 0.95                                         | 1E-06                 | 0.01          | yes (BeadStudio GenCall score <0.7; SNPs exclusive to 610K or CNV370) | Impute2                       | 1000 Genomes Project (CEU Mar 2010) + HapMap3 (All 11 populations, Feb 2009) | 36         | Plink                |
| <b>ALSPAC</b>       | Illumina HumanHap550 quad        |                                              | 0.97                                             | 0.32 - 0.345 or 0.31 - 0.33 | caucasians only      | sex discrepancies, cryptic relatedness, replicates <80% IBD | 0.95                                         | 5E-07                 | 0.01          | No                                                                    | Mach 1.0.16                   | 22                                                                           | 36         | Mach2Dat             |
| <b>BAMSE*</b>       | illumina 610k                    | GenCall                                      | no                                               | no                          | caucasians only      | sex discrepancies, related individuals                      | no                                           | no                    | no            | No                                                                    | Mach                          | 22                                                                           | 36         | ProbAbel             |
| <b>B58C-REPL</b>    | Illumina 550k/610k               | GenCall                                      | 0.98                                             | none                        | yes                  | none                                                        | 0.95                                         | 1E-04                 | 0.01          | inconsistency of allele frequency across multiple deposits            | Mach                          | 21                                                                           | 35         | ProbAbel             |
| <b>ECRHS*</b>       | illumina 610 quad                | Gencall                                      | no                                               | no                          | caucasians only      | sex discrepancies, cryptic relatedness                      | no                                           | no                    | no            | no                                                                    | MACH                          | 22                                                                           | 36         | ProbABEL             |
| <b>Generation R</b> | Illumina 610K quad               | BeadStudio Genotyping Module, version 3.2.32 | 0.975                                            | 3 SD of the mean            | Yes                  | yes (IBD - check: no family relations)                      | 0.98                                         | 1E-06                 | 0.01          | no                                                                    | MACH v1.0.16                  | 22                                                                           | 36         | Plink, MACH2DAT      |
| <b>LISA/GINI</b>    | Affymetrix 5.0<br>Affymetrix 6.0 | BRLMM-P (5.0),<br>BIRDSEED V2 (6.0)          | 0.95                                             | Mean +/- 4 SD               | caucasians only      | sex discrepancies                                           | 0.95                                         | 1E-5                  | 0.01          | no                                                                    | Impute2                       | 22                                                                           | 36         | Snptest              |

|                  |                   |                              |      |          |                 |                                                                |      |         |      |       |         |                  |    |          |
|------------------|-------------------|------------------------------|------|----------|-----------------|----------------------------------------------------------------|------|---------|------|-------|---------|------------------|----|----------|
| <b>MAAS</b>      | illumina 610 quad | illumina GenCall application | 0.97 | outliers | caucasians only | sex discrepancies, were non-concordant on sequenome genotyping | 0.95 | 5.9E-07 | 0.01 | No    | Impute2 | 3 + 1000 genomes | 36 | Snptest  |
| <b>MoBa</b>      | illumina 610 quad | Gen Call                     | 0.97 |          |                 | sex discrepancies                                              | 0.95 | 1E-03   | 0.01 |       | Plink   | 22               | 36 | Plink    |
| <b>NTR</b>       | Affymetrix 6.0    | Birdseed V2                  | no   | no       | no              | Clear sample switches based on fingerprint data (64 SNPs)      | 0.95 | 1E-04   | 0.01 | MI>35 | Beagle  | 22               | 36 | Plink    |
| <b>SAPALDIA*</b> | illumina 610 quad | Gencall                      | no   | no       | caucasians only | sex discrepancies, cryptic relatedness                         | no   | no      | no   | no    | Mach    | 22               | 36 | ProbABEL |

**de novo genotyping replication**

| Cohort                  | Genotyping Method                                               | Genotype-Calling Algorithm  | QUALITY CONTROL PER SUBJECT |                      |                                     | QUALITY CONTROL PER SNP |                              | Association Software |
|-------------------------|-----------------------------------------------------------------|-----------------------------|-----------------------------|----------------------|-------------------------------------|-------------------------|------------------------------|----------------------|
|                         |                                                                 |                             | call rate threshold         | ethnicity exclusions | other exclusion criteria            | lowest SNP call rate    | SNPs with HWE p-values <0.05 |                      |
| <b>Health2006</b>       | The PCR KASPar genotyping system (KBiosciences, Hoddesdon, UK). | Kraken (Kbioscience)        | 0.98                        | caucasians           | Danish citizenship, born in Denmark | 0.98                    | 0                            | SPSS                 |
| <b>KORA F4 / GENEVA</b> | Sequenom MALDI-TOF MS 4.0                                       | Sequenom Typer 4.0          | 0.97                        | caucasian            | sex discrepancies                   | 0.97                    | 0                            | R                    |
| <b>NFBC86</b>           | The PCR KASPar genotyping system (KBiosciences, Hoddesdon, UK). | Klustercaller (Kbioscience) | 0.97                        |                      |                                     | 0.97                    | 0                            | Quicktest            |

\*GABRIEL cohorts had QC applied only after the imputation step, see BAMSE methods for details.



**Supplementary Table 3. Discovery and replication results of the top 11 SNPs for atopic dermatitis.** 1 SNP per region was followed up in the replication stage. Results are for the fixed effect inverse-variance meta-analysis, with genomic control applied to the individual studies in the discovery meta-analysis. The heterogeneity p-value (het p), testing for overall heterogeneity between all discovery and replication studies was generated using Cochran's Q-test for heterogeneity. All OR (odds ratios) are given with the minor allele representing the effect allele (Eff). CI denotes the confidence interval

| chr | SNP        | Position (bp) | Gene   | Alleles |     | Effect Allele Freq | Discovery |                   |                | Replication |                  |                | Combined |                  |                |       |
|-----|------------|---------------|--------|---------|-----|--------------------|-----------|-------------------|----------------|-------------|------------------|----------------|----------|------------------|----------------|-------|
|     |            |               |        | Eff     | Alt |                    | N         | OR (95% CI)       | pvalue         | N           | OR (95% CI)      | pvalue         | N        | OR(95%CI)        | pvalue         | het p |
| 11  | rs479844   | 65308533      | OVOL1  | A       | G   | 0.44               | 26,151    | 0.89 (0.85, 0.93) | <b>7.8E-07</b> | 25,098      | 0.87 (0.83,0.92) | <b>2.4E-08</b> | 51,249   | 0.88 (0.85,0.91) | <b>1.1E-13</b> | 0.23  |
| 19  | rs2164983  | 8650381       | ACTL9  | A       | C   | 0.15               | 17,403†   | 1.22 (1.13, 1.32) | <b>1.8E-07</b> | 22,996      | 1.11 (1.04,1.19) | <b>0.002</b>   | 40,399   | 1.16 (1.10,1.22) | <b>7.1E-09</b> | 0.004 |
| 1   | rs9050*    | 150345938     | TCHH   | A       | C   | 0.06               | 25,788    | 1.33 (1.20, 1.47) | <b>1.9E-08</b> | -           | -                | -              | -        | -                | -              | 0.95  |
| 5   | rs2897442  | 132076926     | KIF3A  | C       | T   | 0.29               | 26,164    | 1.12 (1.07, 1.18) | <b>7.8E-06</b> | 25,064      | 1.09 (1.04,1.15) | <b>0.001</b>   | 51,228   | 1.11 (1.07,1.15) | <b>3.8E-08</b> | 0.52  |
| 8   | rs7000782  | 81470705      | ZBTB10 | A       | T   | 0.43               | 26,077    | 1.14 (1.09, 1.20) | <b>1.6E-08</b> | 20,873      | 1.03 (0.98,1.08) | <b>0.296</b>   | 46,950   | 1.09 (1.05,1.13) | <b>1.1E-06</b> | 0.24  |
| 22  | rs4821544  | 35588449      | NCF4   | C       | T   | 0.29               | 24,770    | 1.13 (1.07, 1.19) | <b>3.5E-06</b> | 25,103      | 1.05 (0.99,1.10) | <b>0.077</b>   | 49,873   | 1.09 (1.05,1.13) | <b>5.5E-06</b> | 0.53  |
| 6   | rs3853601  | 31607582      | BAT1   | G       | C   | 0.12               | 25,528    | 1.17 (1.09, 1.26) | <b>7.6E-06</b> | 21,964      | 1.09 (1.01,1.17) | <b>0.031</b>   | 47,492   | 1.13 (1.08,1.19) | <b>1.9E-06</b> | 0.04  |
| 10  | rs10994675 | 51233999      | MSMB   | A       | G   | 0.42               | 24,787    | 1.12 (1.07, 1.17) | <b>3.1E-06</b> | 22,903      | 1.00 (0.95,1.05) | <b>0.929</b>   | 47,690   | 1.06 (1.03,1.10) | <b>0.001</b>   | 0.39  |
| 13  | rs1327914  | 95891570      | HS6ST3 | C       | T   | 0.17               | 26,168    | 1.16 (1.10, 1.24) | <b>8.9E-07</b> | 25,088      | 0.98 (0.92,1.04) | <b>0.434</b>   | 51,256   | 1.07 (1.02,1.12) | <b>0.003</b>   | 0.005 |
| 10  | rs4520482  | 67139368      | CTNNA3 | A       | G   | 0.43               | 26,031    | 0.90 (0.86, 0.94) | <b>8.7E-06</b> | 25,109      | 1.02 (0.97,1.07) | <b>0.457</b>   | 51,140   | 0.96 (0.92,0.99) | <b>0.008</b>   | 0.32  |
| 9   | rs10983837 | 119738636     | TLR4   | A       | C   | 0.03               | 26,101    | 1.35 (1.18, 1.54) | <b>6.8E-06</b> | 24,168      | 0.92 (0.80,1.05) | <b>0.229</b>   | 50,269   | 1.12 (1.02,1.24) | <b>0.015</b>   | 0.002 |

\*rs9050 (and other associated SNP rs11205006 in the same region) were excluded from the replication phase after they were found to not be independent from the association with the *FLG* mutations in the same region.

†rs2164983 was not included in the HapMap release 21 and so was missing for some discovery cohorts.

The SNP rs1327914 was replaced by the SNP rs927709 ( $r^2=1.00$ ) in the B58C-WTCCC, B58C-T1DGC, KORA-F3, NFBC66 and the B58C replication cohort

**Supplementary Table 4. AD association results from the discovery meta-analysis for the 15 loci associated with asthma or total serum IgE levels in a recent GWAS.** Moffat MF, Gut IG, Demenais F, et al. A large-scale consortium-based genomewide association study of asthma. *N Engl J Med* 2010;125:328-35.

| SNP        | Gene            | Position | effect allele | other allele | Moffat et al. (2010) asthma association results |         | AD association results from current meta-analysis |        |
|------------|-----------------|----------|---------------|--------------|-------------------------------------------------|---------|---------------------------------------------------|--------|
|            |                 |          |               |              | OR (95% CI)                                     | pvalue  | OR (95% CI)                                       | pvalue |
| rs3771166  | <i>IL18R1</i>   | 2q12.1   | a             | g            | 0.87 (0.83-0.91)                                | 3.4E-09 | 1.00 (0.95-1.05)                                  | 0.9791 |
| rs9273349  | <i>HLA-DQB1</i> | 6p21.32  | g             | a            | 1.18 (1.13-1.24)                                | 7.0E-14 | 0.95 (0.86-1.04)                                  | 0.2647 |
| rs1342326  | <i>IL33</i>     | 9p24.1   | c             | a            | 1.20 (1.13-1.28)                                | 9.2E-10 | 0.99 (0.93-1.05)                                  | 0.7789 |
| rs744910   | <i>SMAD3</i>    | 15q22.33 | a             | g            | 0.89 (0.86-0.92)                                | 3.9E-09 | 0.98 (0.94-1.03)                                  | 0.3987 |
| rs2305480  | <i>GSDMB</i>    | 17q12    | a             | g            | 0.85 (0.81-0.90)                                | 9.6E-08 | 1.00 (0.96-1.05)                                  | 0.8723 |
| rs3894194  | <i>GSDM1</i>    | 17q21.1  | a             | g            | 1.17 (1.11-1.23)                                | 4.6E-09 | 1.00 (0.95-1.04)                                  | 0.8893 |
| rs2284033  | <i>IL2RB</i>    | 22q12.3  | a             | g            | 0.89 (0.86-0.93)                                | 1.1E-08 | 1.03 (0.98-1.07)                                  | 0.2845 |
| rs1295686  | <i>IL13</i>     | 5q31.1   | c             | t            | 0.85 (0.79-0.90)                                | 1.4E-07 | 0.91 (0.86-0.96)                                  | 0.0008 |
| rs2073643  | <i>SLC22A5</i>  | 5q31.1   | c             | t            | 0.89 (0.84-0.93)                                | 2.2E-07 | 0.96 (0.92-1.00)                                  | 0.0771 |
| rs11071559 | <i>RORA</i>     | 15q22.2  | t             | c            | 0.88 (0.81-0.95)                                | 1.1E-07 | 1.01 (0.95-1.08)                                  | 0.7475 |

  

| SNP       | Gene               | Position | effect allele | other allele | Moffat et al. (2010) total serum IgE association results |         | AD association results from current meta-analysis |        |
|-----------|--------------------|----------|---------------|--------------|----------------------------------------------------------|---------|---------------------------------------------------|--------|
|           |                    |          |               |              | beta                                                     | pvalue  | OR (95% CI)                                       | pvalue |
| rs2252226 | <i>FCER1A</i>      | 1q23.2   | t             | c            | NA                                                       | 6.6E-05 | 0.96 (0.92-1.01)                                  | 0.0817 |
| rs20541   | <i>IL13</i>        | 5q31.1   | a             | g            | NA                                                       | 1.0E-06 | 1.10 (1.04-1.16)                                  | 0.0007 |
| rs9271300 | <i>HLA-DRB1</i>    | 6p21.32  | c             | g            | NA                                                       | 8.3E-15 | 0.99 (0.90-1.09)                                  | 0.9013 |
| rs167769  | <i>STAT6</i>       | 12q13.3  | t             | c            | NA                                                       | 8.5E-07 | 1.05 (1.00-1.10)                                  | 0.0379 |
| rs1859308 | <i>IL4-R/IL21R</i> | 16p12.1  | a             | g            | NA                                                       | 8.2E-06 | 0.97 (0.91-1.04)                                  | 0.4477 |

**Supplementary Table 5. Meta-analysis results for interactions between the three identified loci.** Results are based on the discovery cohorts. Betas are the ln(odds) of AD per 1 unit change in the interaction variable (SNP1\*SNP2, SNPs coded as 0,1,2 with the minor allele as the increasing allele).

| Interaction         | beta   | 95% CI          | p-value |
|---------------------|--------|-----------------|---------|
| rs2897442*rs479844  | -0.020 | -0.090 to 0.050 | 0.578   |
| rs2897442*rs2164983 | 0.038  | -0.081 to 0.157 | 0.535   |
| rs2164983*rs479844  | 0.019  | -0.086 to 0.124 | 0.722   |

**Supplementary Table 6. ImmunoChip association results on region 5q31.1.** Conditional association analysis for markers of the cytokine cluster on 5q31.1 including *IL13* polymorphisms previously shown to be associated with asthma and psoriasis risk, as well as the GWAS *KIF3A* polymorphism showing the strongest association in the meta-analysis and the lead SNP of the corresponding putative LD-block from the finemapping approach.

|          |                   | Marker 1                                                          |                                                                    |                                                                    |                                                                   |                                                                   |
|----------|-------------------|-------------------------------------------------------------------|--------------------------------------------------------------------|--------------------------------------------------------------------|-------------------------------------------------------------------|-------------------------------------------------------------------|
|          |                   | rs1800925 (IL13)                                                  | rs20541 (IL13)                                                     | rs848 (IL13)                                                       | rs66913936 (IL4)                                                  | rs2897442 (KIF3A)                                                 |
| Marker 2 | rs1800925 (IL13)  | <b>1.32 (1.20-1.46)</b><br><b><i>P=1.74 x 10<sup>-8</sup></i></b> | 1.26 (1.11-1.41)<br>P=0.0002                                       | 1.27 (1.12-1.42)<br>P=0.0001                                       | 1.23 (1.11-1.35)<br>P=5.36 x 10 <sup>-5</sup>                     | 1.19 (1.08-1.31)<br>P=0.0005                                      |
|          | rs20541 (IL13)    | 1.17 (1.04-1.32)<br>P=0.0085                                      | <b>1.37 (1.24-1.52)</b><br><b><i>P=4.07 x 10<sup>-10</sup></i></b> | 1.42 (0.72-2.81)<br>P=0.3090                                       | 1.18 (1.06-1.31)<br>P=0.0018                                      | 1.14 (1.03-1.26)<br>P=0.0096                                      |
|          | rs848 (IL13)      | 1.17 (1.04-1.31)<br>P=0.0107                                      | 0.97 (0.49-1.92)<br>P=0.9249                                       | <b>1.38 (1.25-1.52)</b><br><b><i>P=1.93 x 10<sup>-10</sup></i></b> | 1.18 (1.06-1.31)<br>P=0.0022                                      | 1.14 (1.03-1.26)<br>P=0.0113                                      |
|          | rs66913936 (IL4)  | 1.24 (1.12-1.37)<br>P=3.53 x 10 <sup>-5</sup>                     | 1.27 (1.13-1.42)<br>P=2.86 x 10 <sup>-6</sup>                      | 1.28 (1.14-1.42)<br>P=1.74 x 10 <sup>-5</sup>                      | <b>1.31 (1.19-1.43)</b><br><b><i>P=2.58 x 10<sup>-8</sup></i></b> | 0.91 (0.71-1.17)<br>P=0.4742                                      |
|          | rs2897442 (KIF3A) | 1.26 (1.14-1.39)<br>P=1.01 x 10 <sup>-5</sup>                     | 1.29 (1.16-1.44)<br>P=3.42 x 10 <sup>-6</sup>                      | 1.30 (1.17-1.45)<br>P=2.00 x 10 <sup>-6</sup>                      | 1.43 (1.10-1.84)<br>P=0.0069                                      | <b>1.26 (1.15-1.38)</b><br><b><i>P=8.84 x 10<sup>-7</sup></i></b> |

Conditional analysis of Marker 1 conditioned on Marker 2 using the logistic regression framework. The diagonal elements shows results of the unconditional analysis. Displayed are odds ratios with corresponding 95% confidence intervals in brackets and P-values

**Supplementary Table 7. ImmunoChip linkage disequilibrium (LD) in region 5q31.1.** Pair-wise LD measures between markers of the cytokine cluster on 5q31.1 including *IL13* polymorphisms previously shown to be associated with asthma and psoriasis risk, as well as the GWAS KIF3A polymorphism showing the strongest association in the meta-analysis and the lead SNP of the corresponding putative LD-block from the finemapping approach.

|          |                   | Marker 1         |                |              |                  |                   |
|----------|-------------------|------------------|----------------|--------------|------------------|-------------------|
| Marker 2 |                   | rs1800925 (IL13) | rs20541 (IL13) | rs848 (IL13) | rs66913936 (IL4) | rs2897442 (KIF3A) |
|          | rs1800925 (IL13)  | 1                | 0.301          | 0.298        | 0.090            | 0.078             |
|          | rs20541 (IL13)    | 0.564            | 1              | 0.979        | 0.192            | 0.164             |
|          | rs848 (IL13)      | 0.558            | 0.995          | 1            | 0.194            | 0.166             |
|          | rs66913936 (IL4)  | 0.328            | 0.493          | 0.492        | 1                | 0.858             |
|          | rs2897442 (KIF3A) | 0.323            | 0.483          | 0.483        | 0.982            | 1                 |

The upper triangular matrix shows  $r^2$  values, whereas the lower triangular matrix displays  $D'$  values. The color coding refers to the strength of LD.

| Values  | $R^2$ | $D'$ |
|---------|-------|------|
| <0.2    |       |      |
| 0.2-0.4 |       |      |
| 0.4-0.6 |       |      |
| 0.6-0.8 |       |      |
| >0.8    |       |      |

**Supplementary Figure 1. QQ plot for the discovery genome-wide association meta-analysis**, after excluding all SNPs MAF<1% and Rsqr<0.3 or proper\_info<0.4.  $\lambda=1.017$ .EDC=epidermal differentiation complex region (which contains FLG) defined as Chr 1:150.2-151.9Mb.

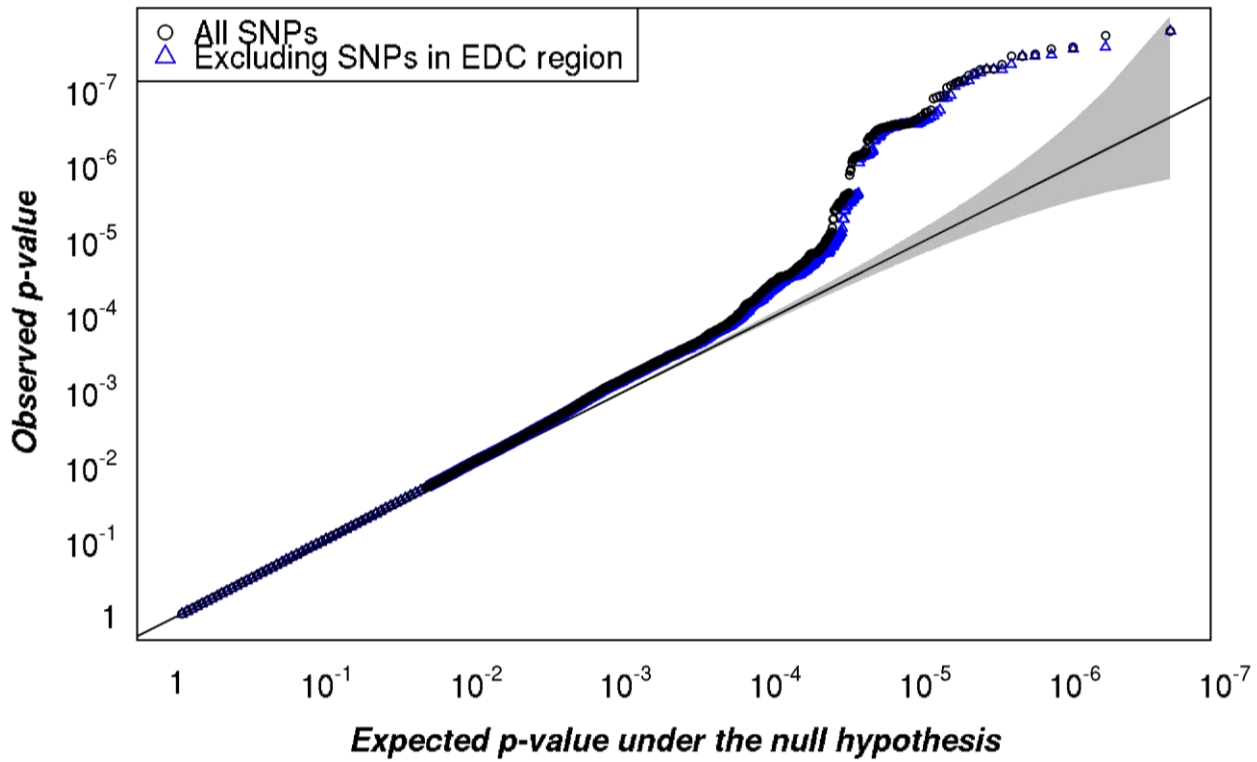

**Supplementary Figure 2. Regional association plots for the top 11 regions.** Ordered by significance in the discovery analysis.

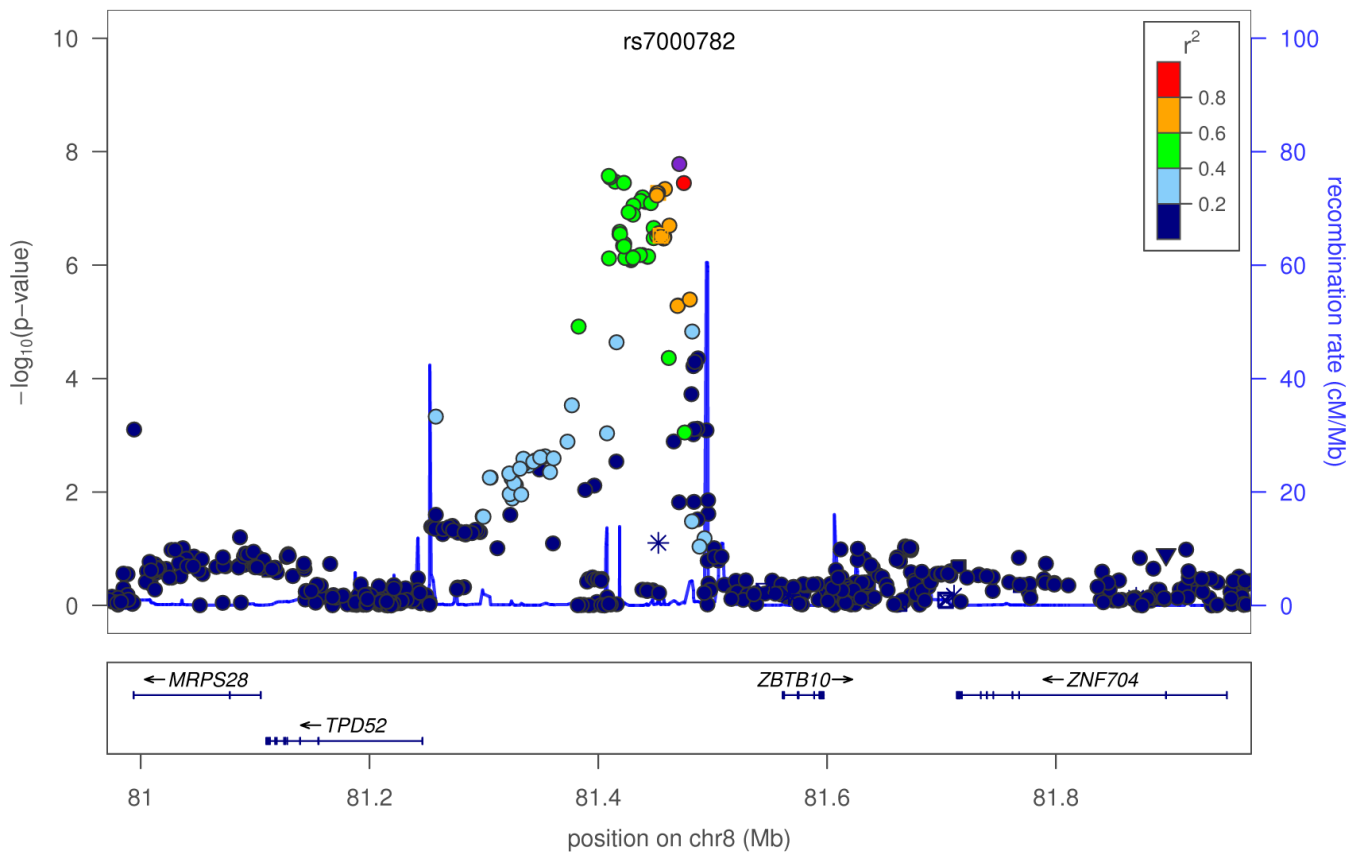

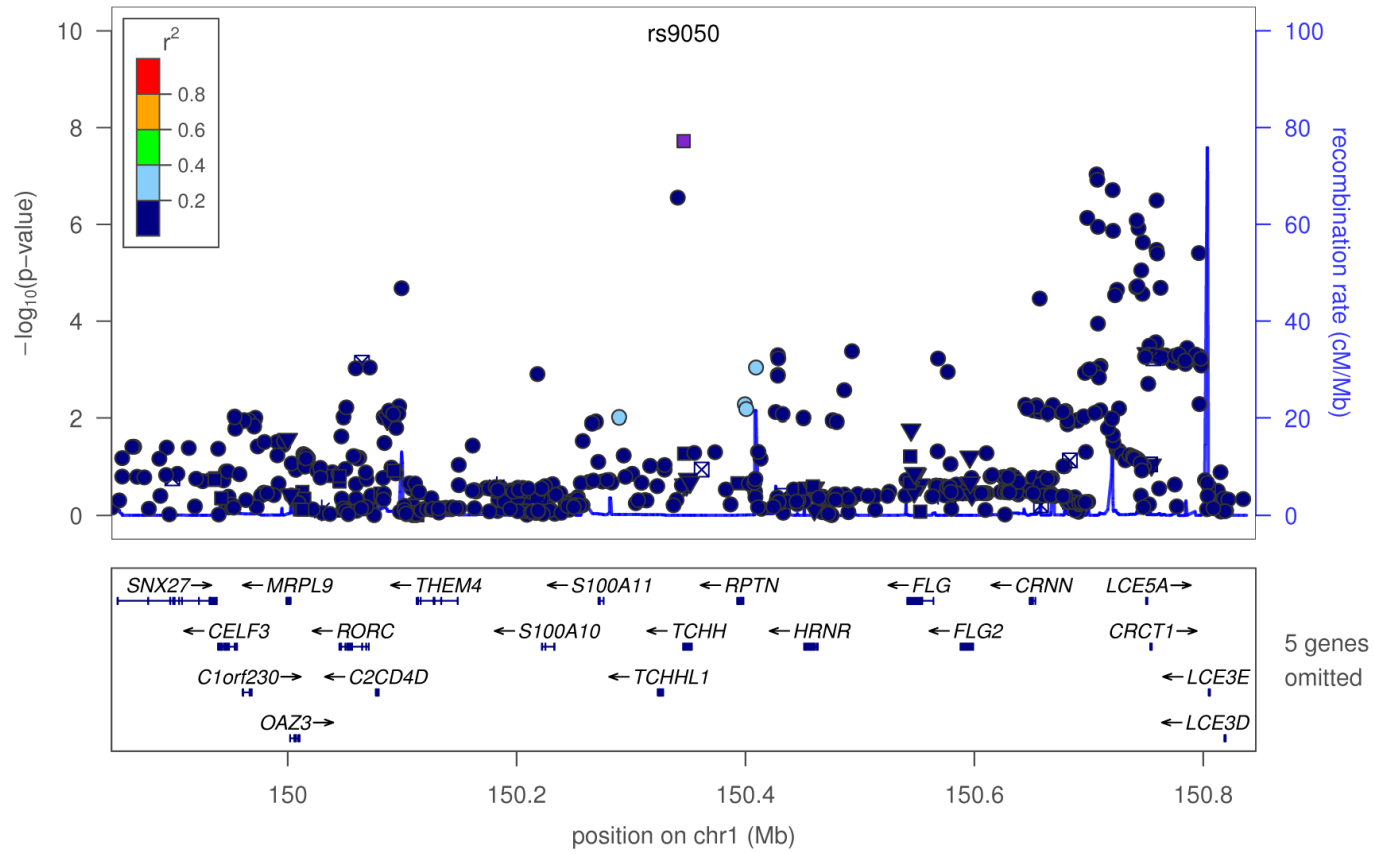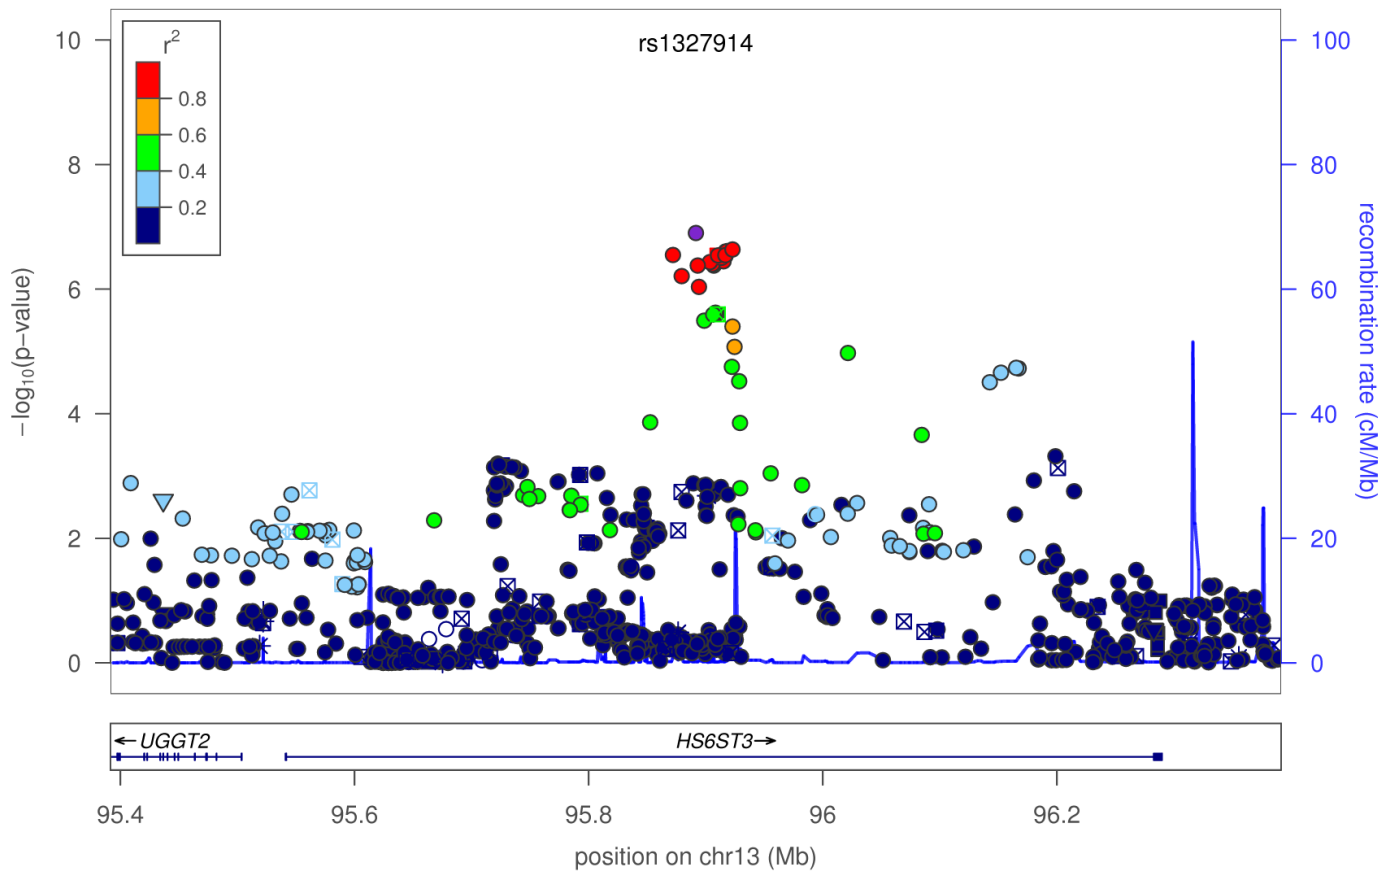



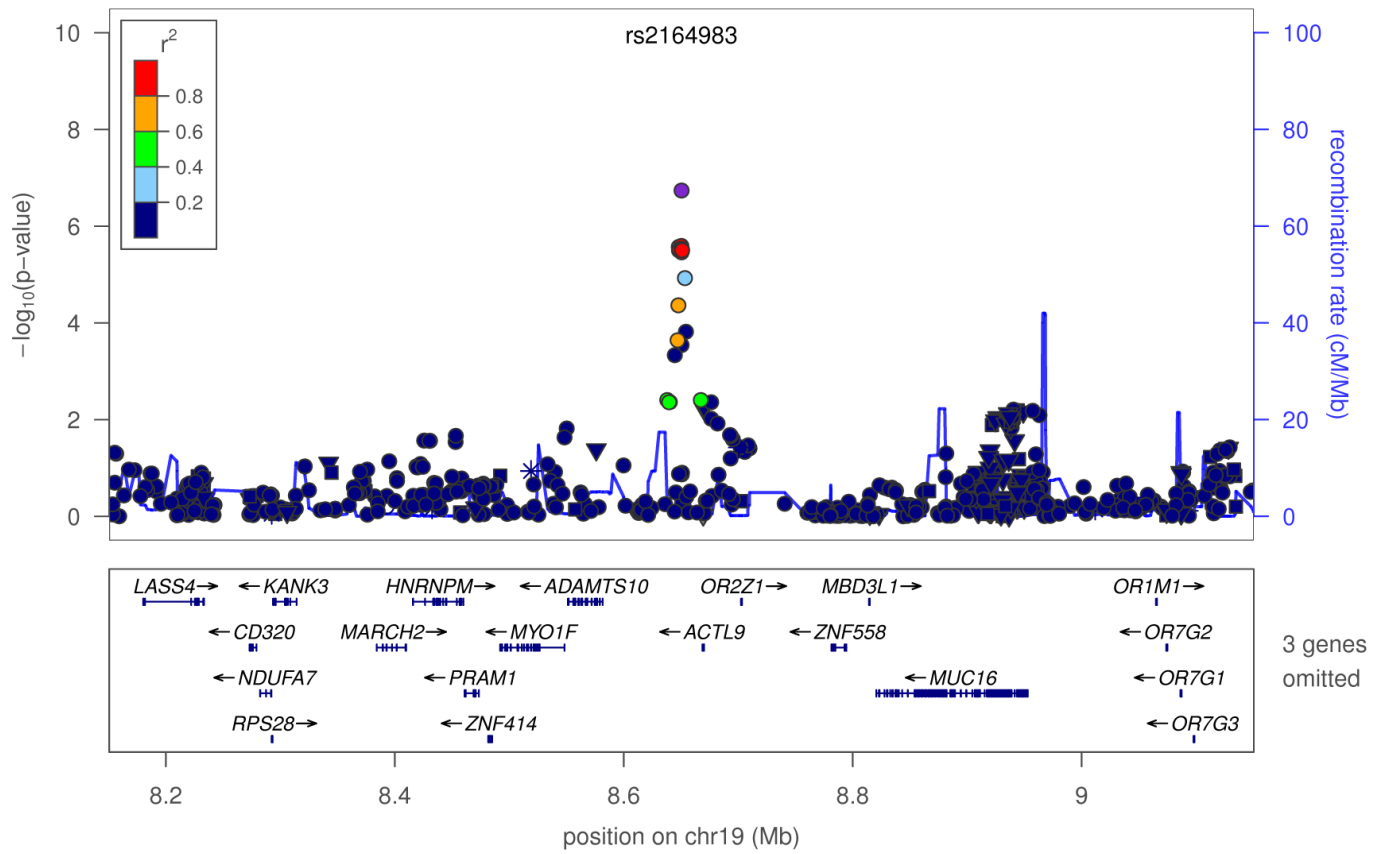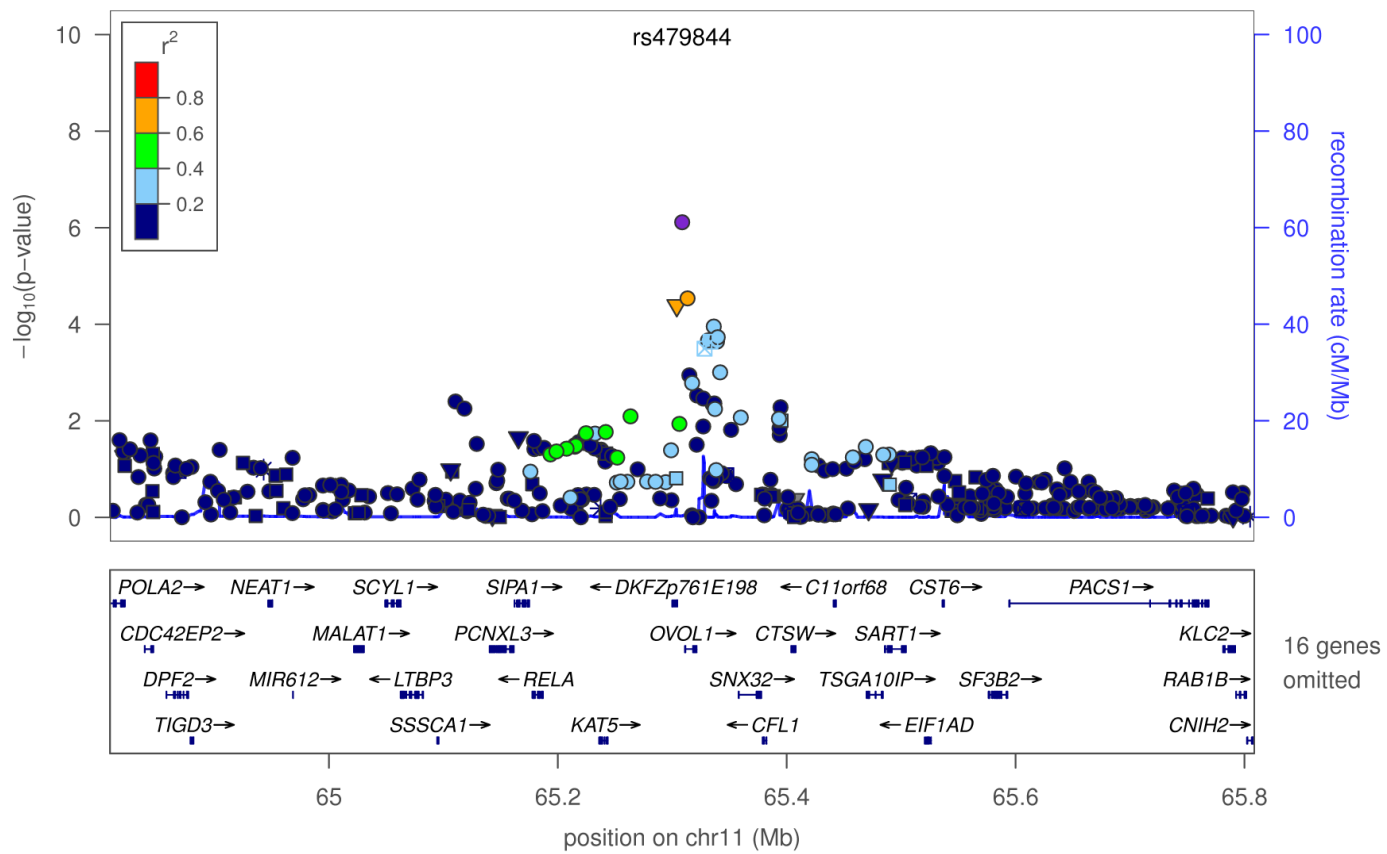

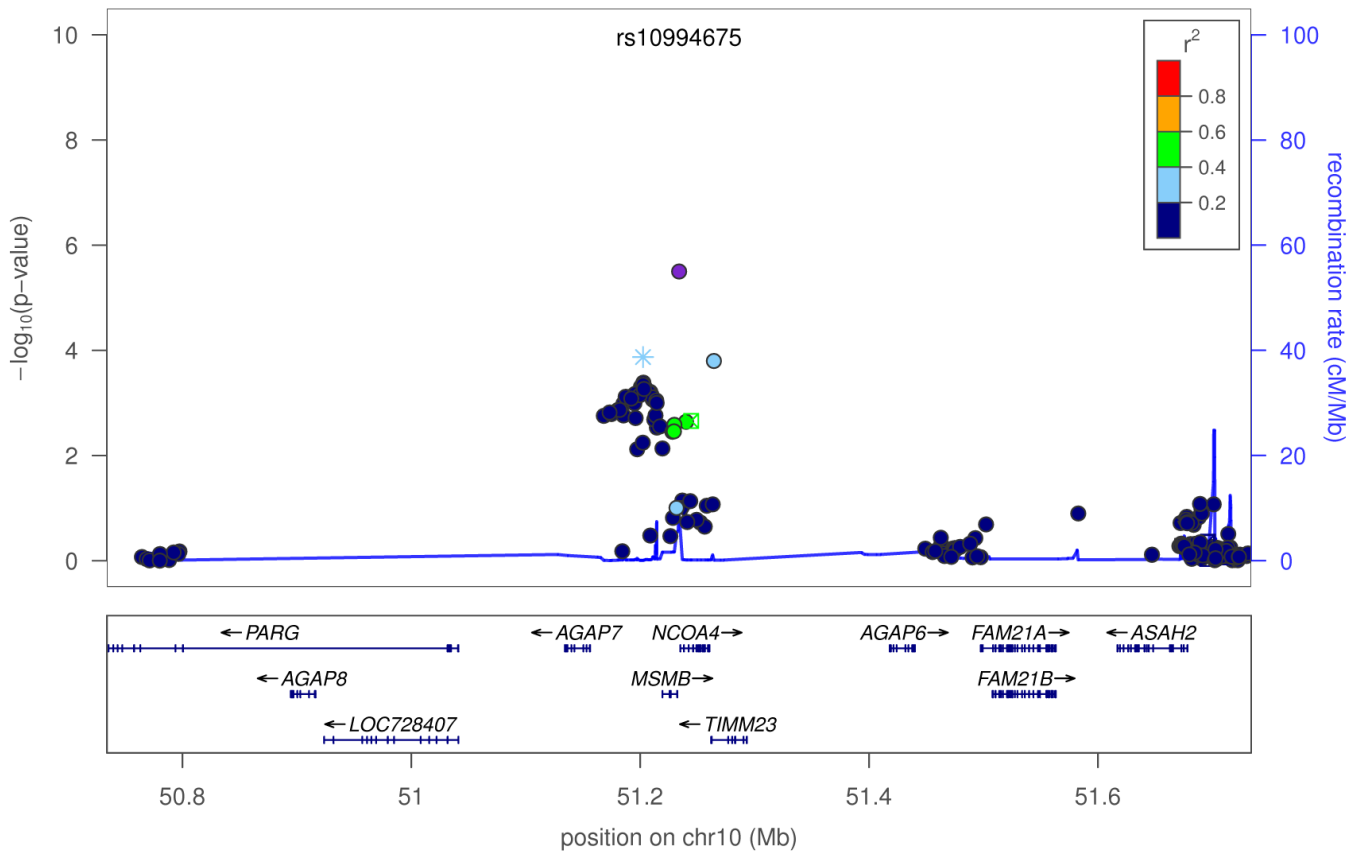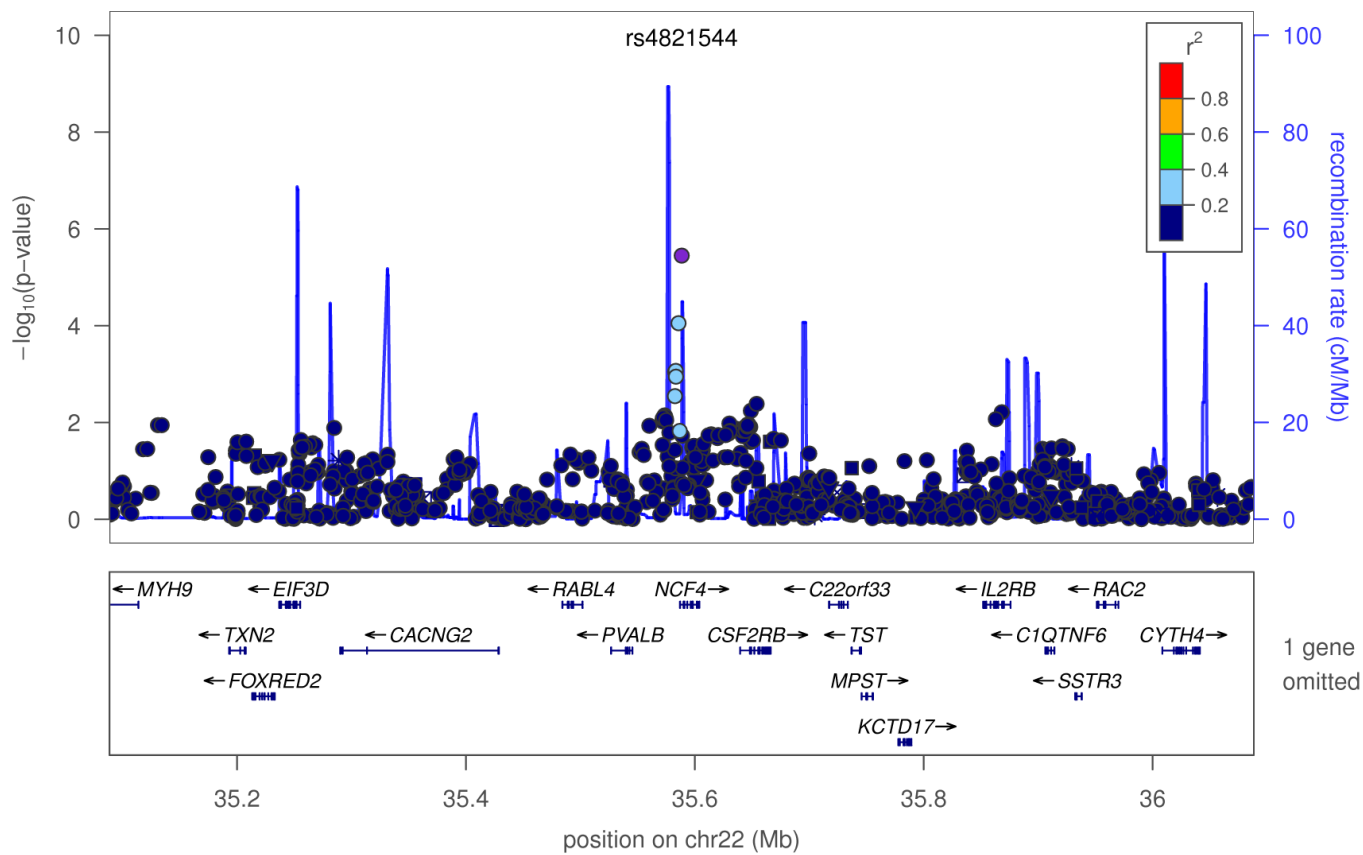

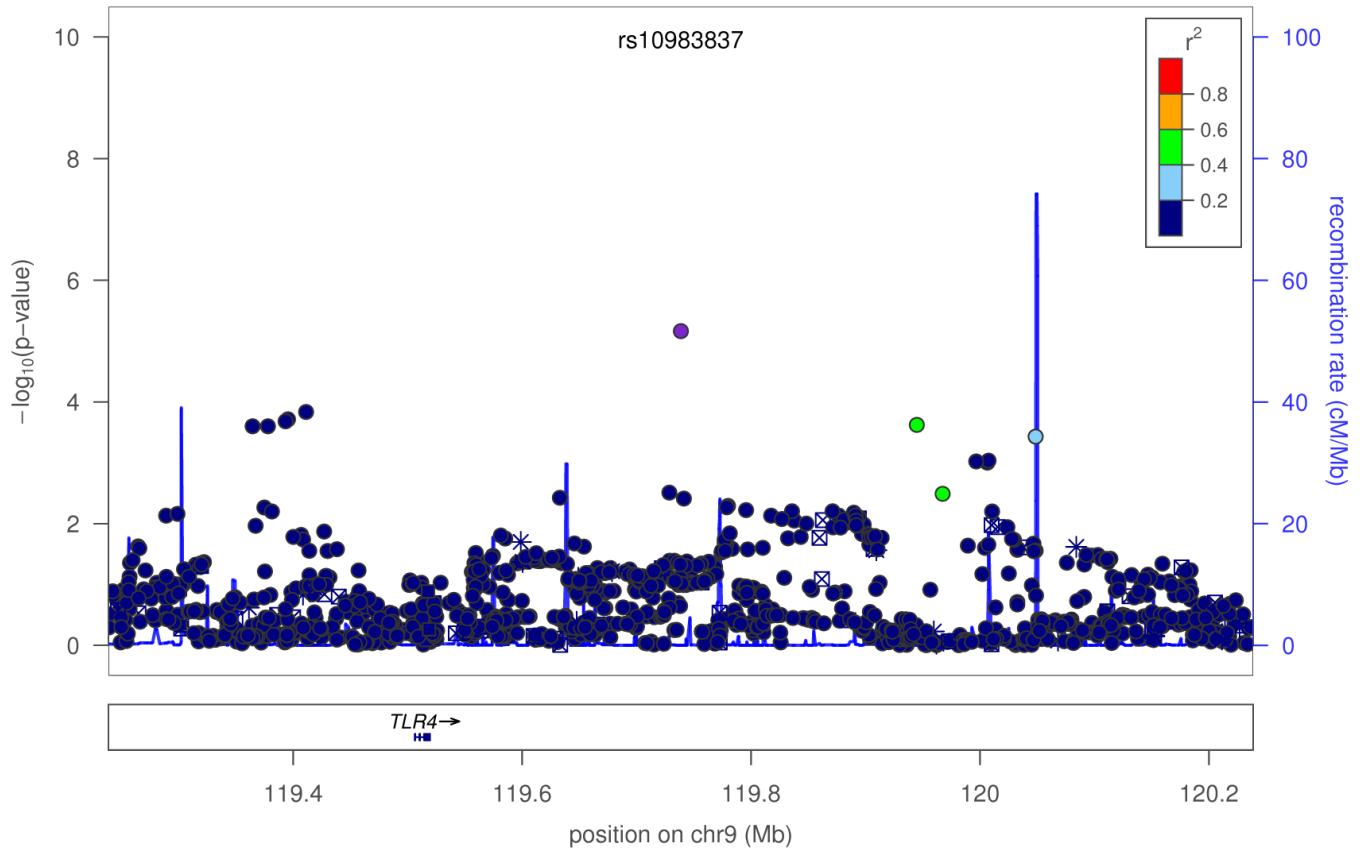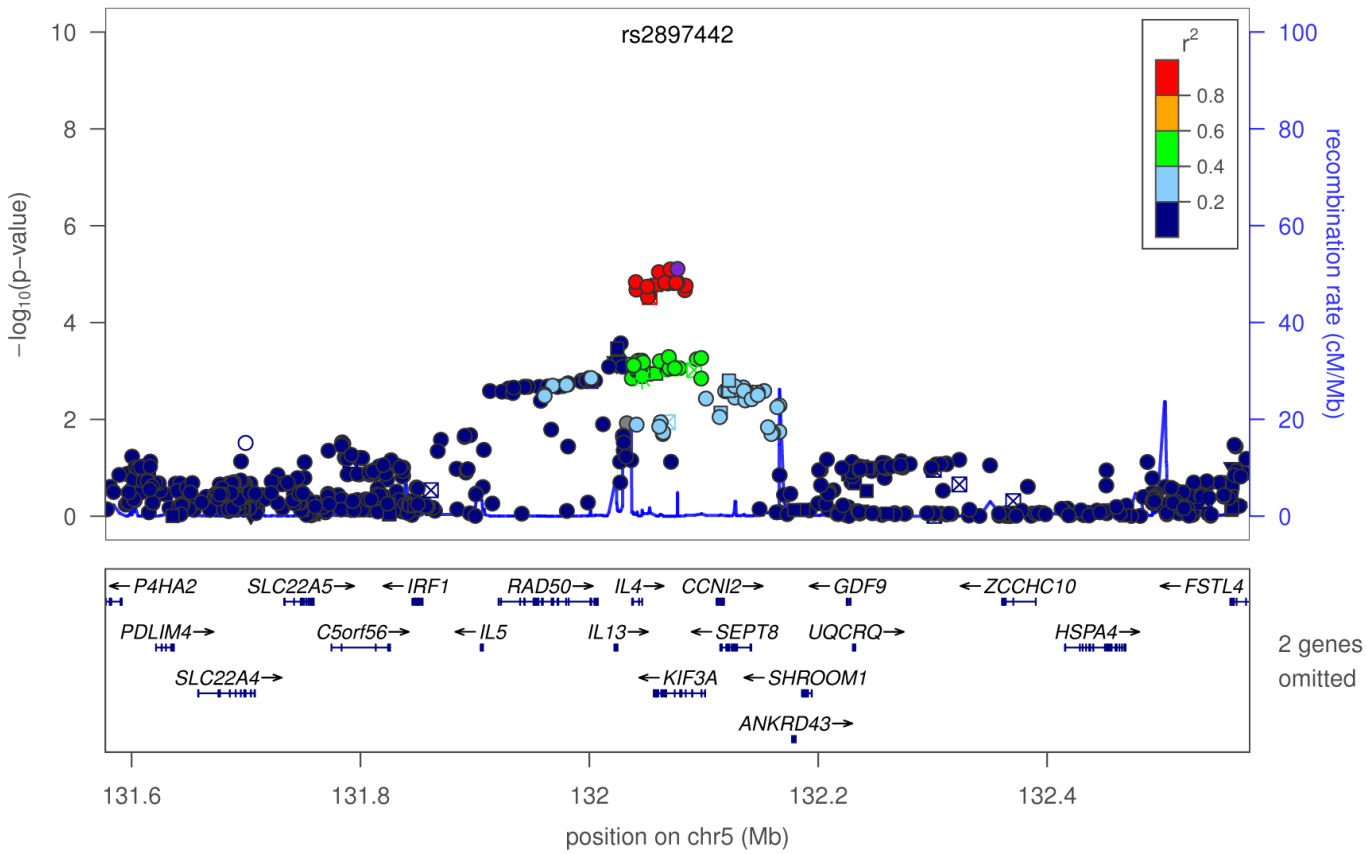

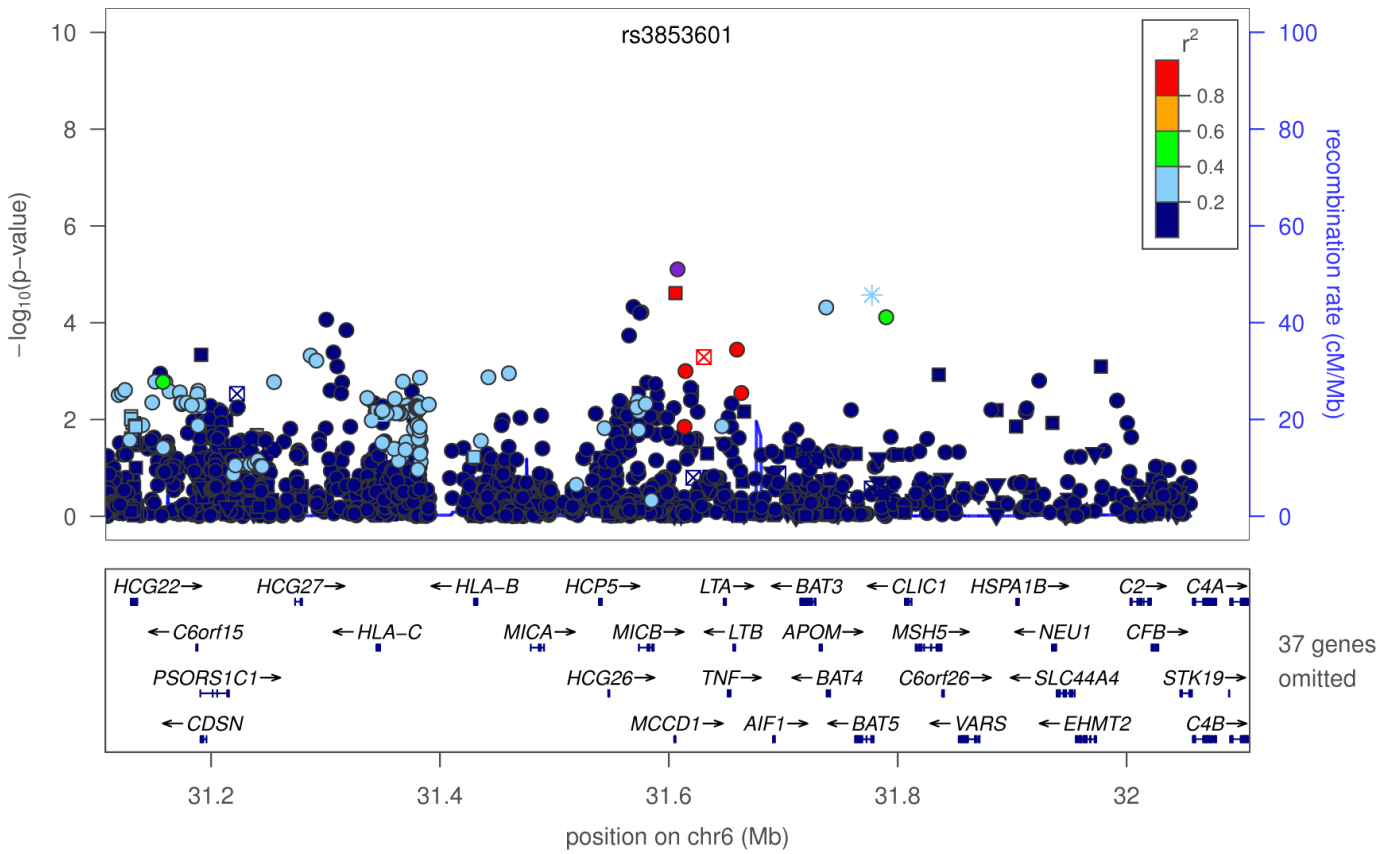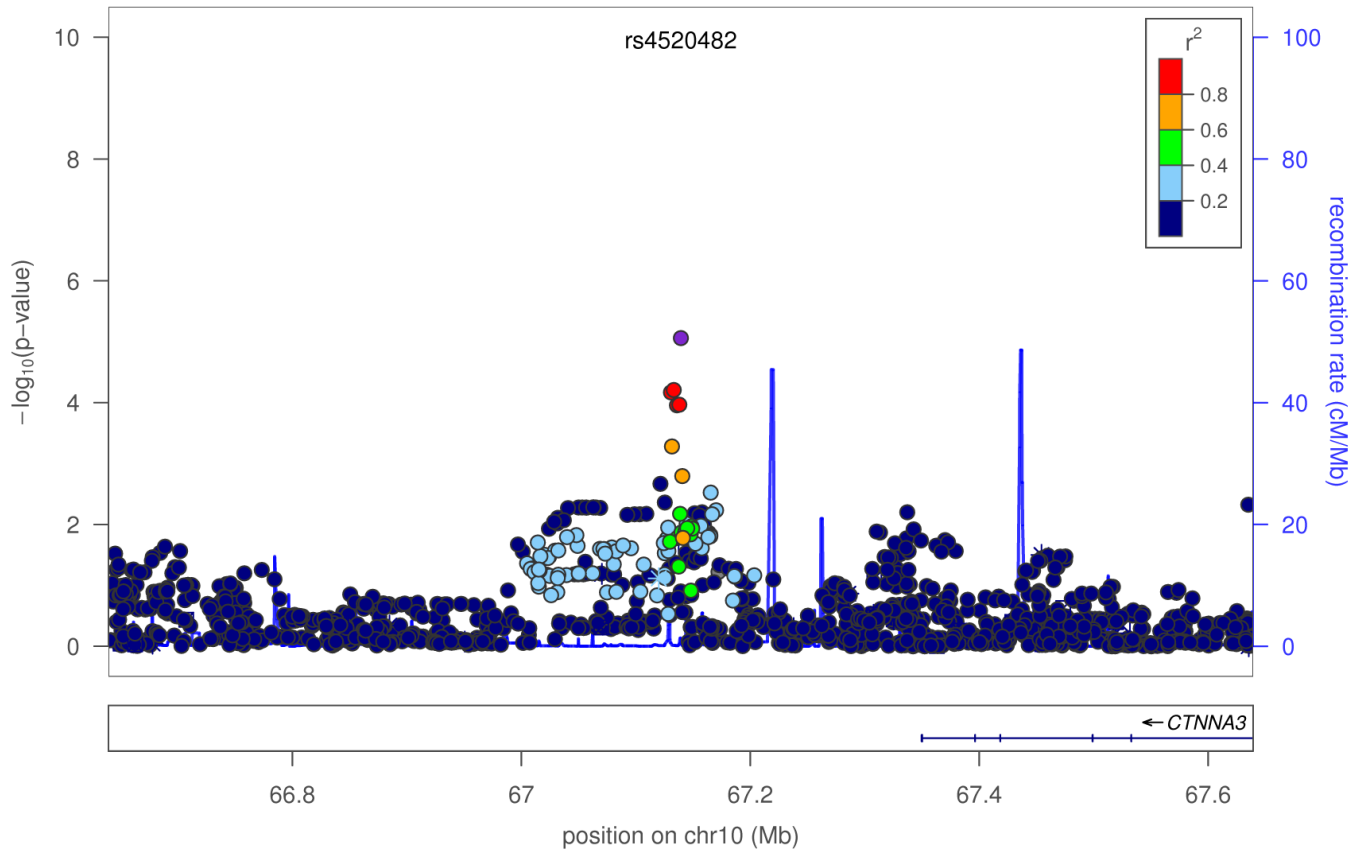

**Supplementary Figure 3. Meta-analysis of 8 studies with no adjustment for FLG mutations**

**(a) and with adjustment for FLG R501X and 2282del4 mutations (b).** rs9050 (purple diamond) OR=1.28, p-value=0.008 in (a) and OR=0.98, p-value=0.88 in (b). A second SNP in the region (rs11205006 at ~150.7Mb) OR=1.21, p-value= $8 \times 10^{-5}$  in (a) and OR=1.09, p-value=0.15 in (b). Plotted using LocusZoom ([csg.sph.umich.edu/locuszoom/](http://csg.sph.umich.edu/locuszoom/)). Data from ALSPAC, BAMSE, COPSAC, KORA F3, KORA F4, LISA, MAAS and PIAMA studies contributed to these analyses.

**a.**

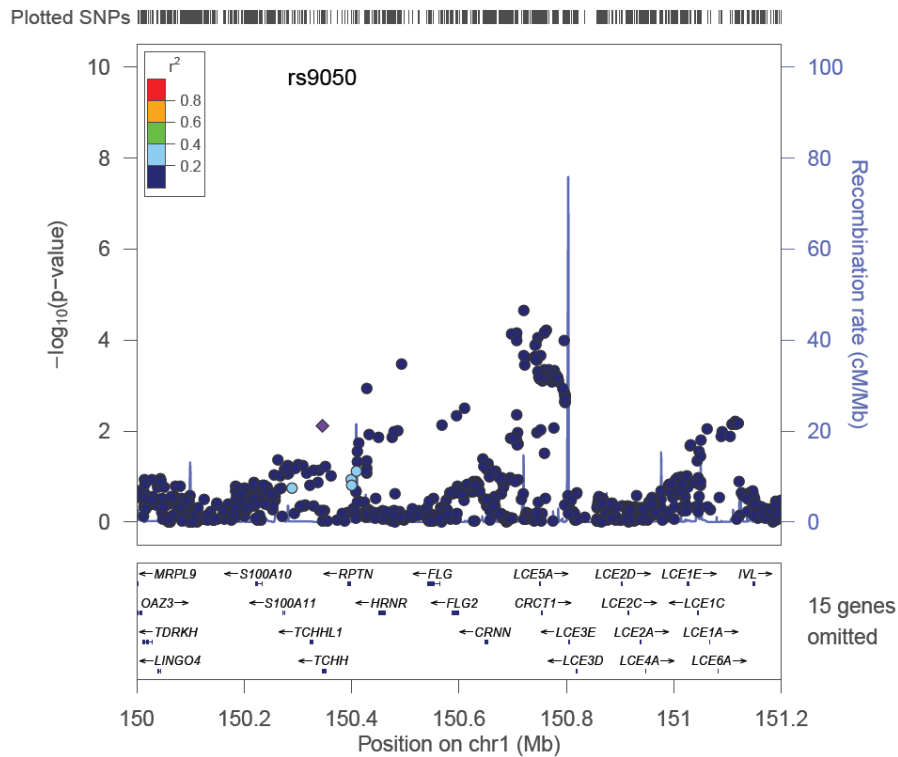

**b.**

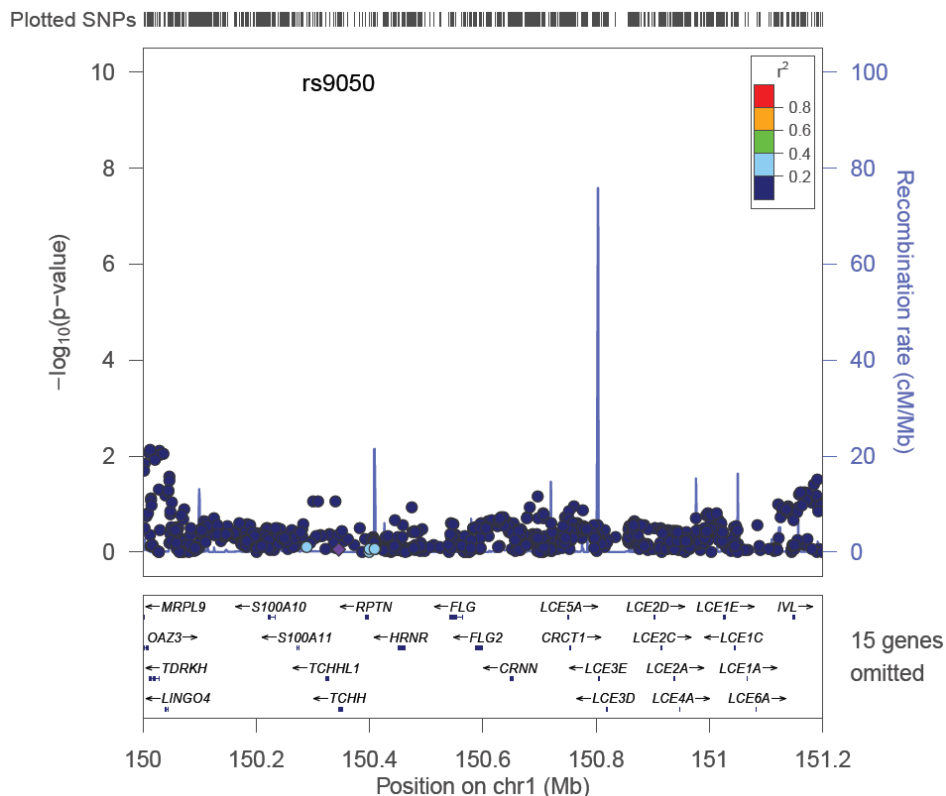

**Supplementary Figure 4. Previously known 11q13 (rs7927894) association in our study.** (a)

The regional association plot for the discovery meta-analysis (top SNP, rs11236810 p=0.0002), (b) The forest plot for the association in each of the discovery cohorts for rs7927894 with T as the risk allele (het p=0.127). GENR= Generation R.

a.

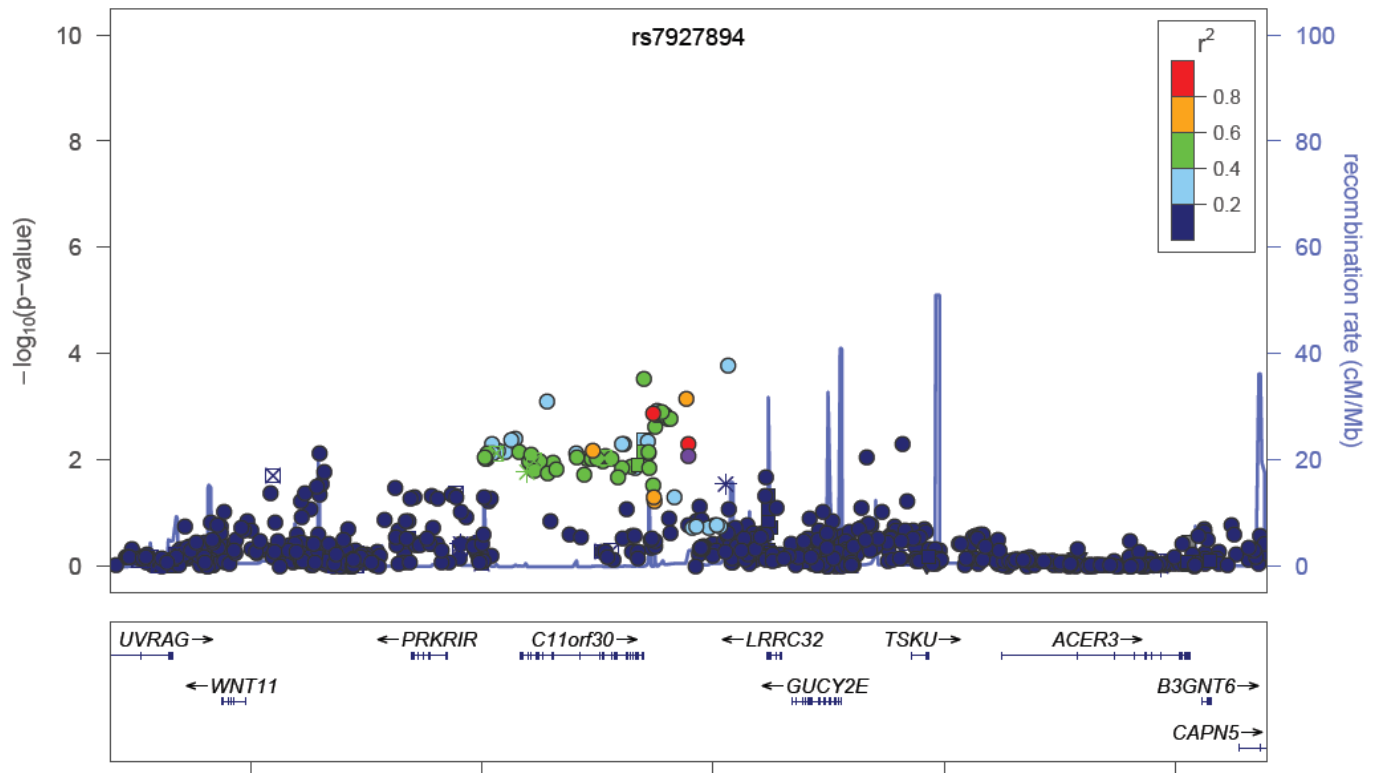

rs7927894

b.

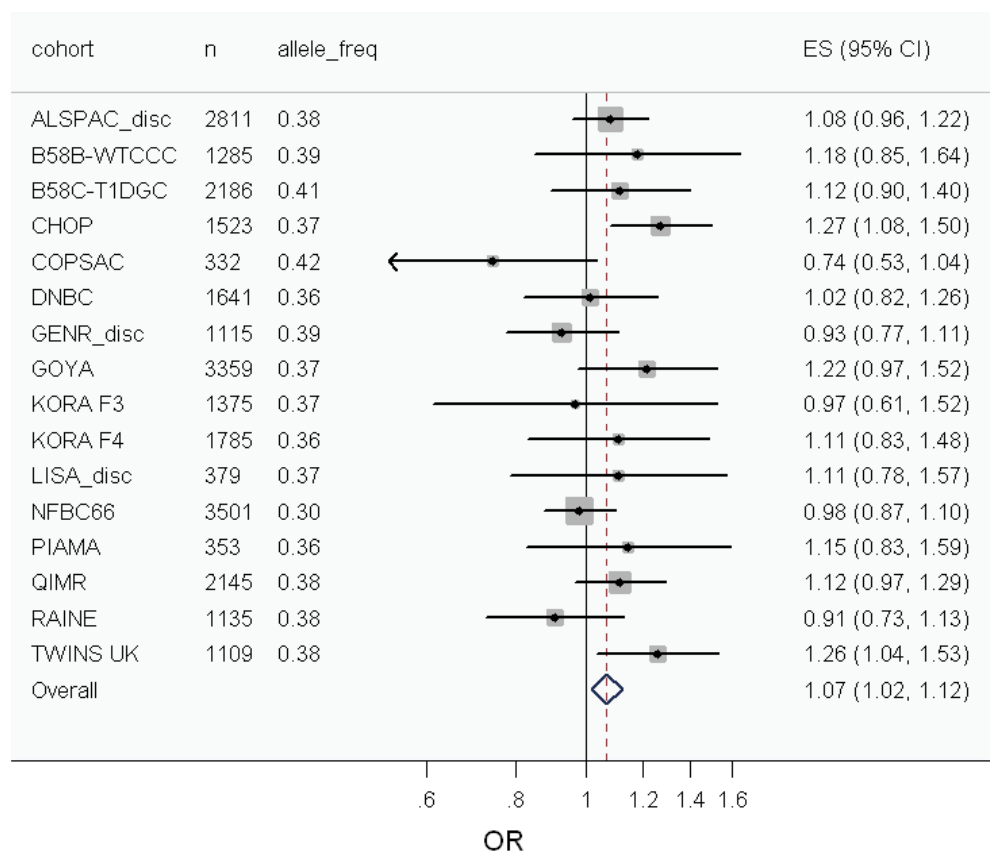

**Supplementary Figure 5. Forest plots of the association of the 7 SNPs which did not meet genome-wide significance with atopic dermatitis for the discovery and replication studies.**

All ORs are reported with the minor allele (shown in brackets) as the effect allele. \*MoBa imputation quality score was 'info' from PLINK. GENR= Generation R. 'gen' in the imputation (Gen/Imp) column refers to SNPs that were on the genome-wide genotyping chip for the discovery samples and were either on the genome-wide genotyping chip or were individually genotyped for the replications samples. Only Health2006, KORA/GENEVA and NFBC86` underwent individual SNP genotyping.

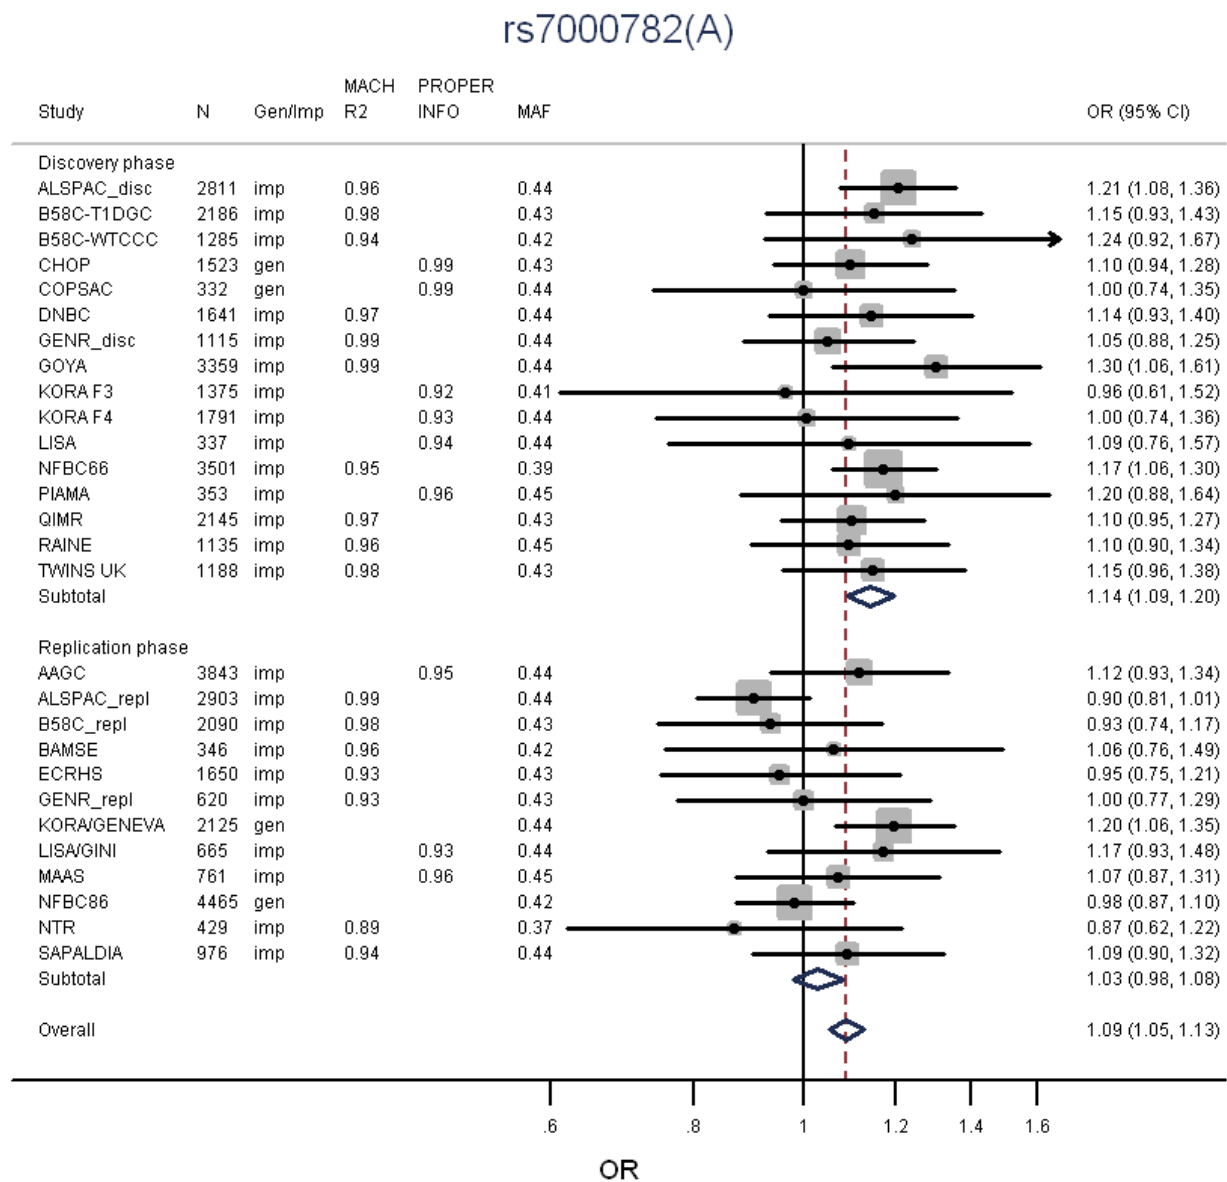

## rs3853601(G)

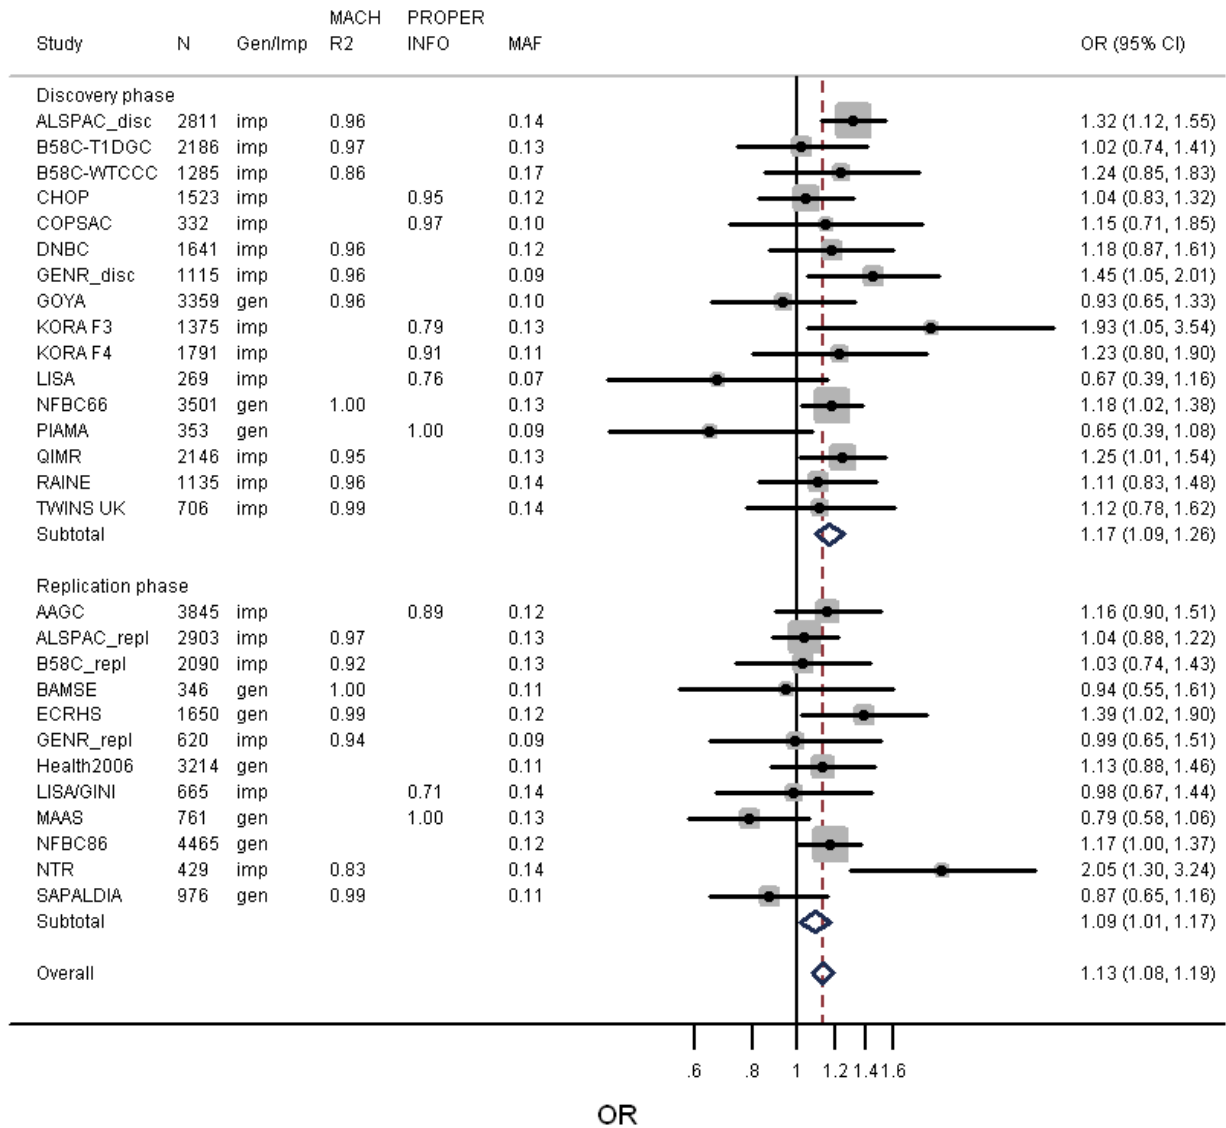



# rs4821544(C)

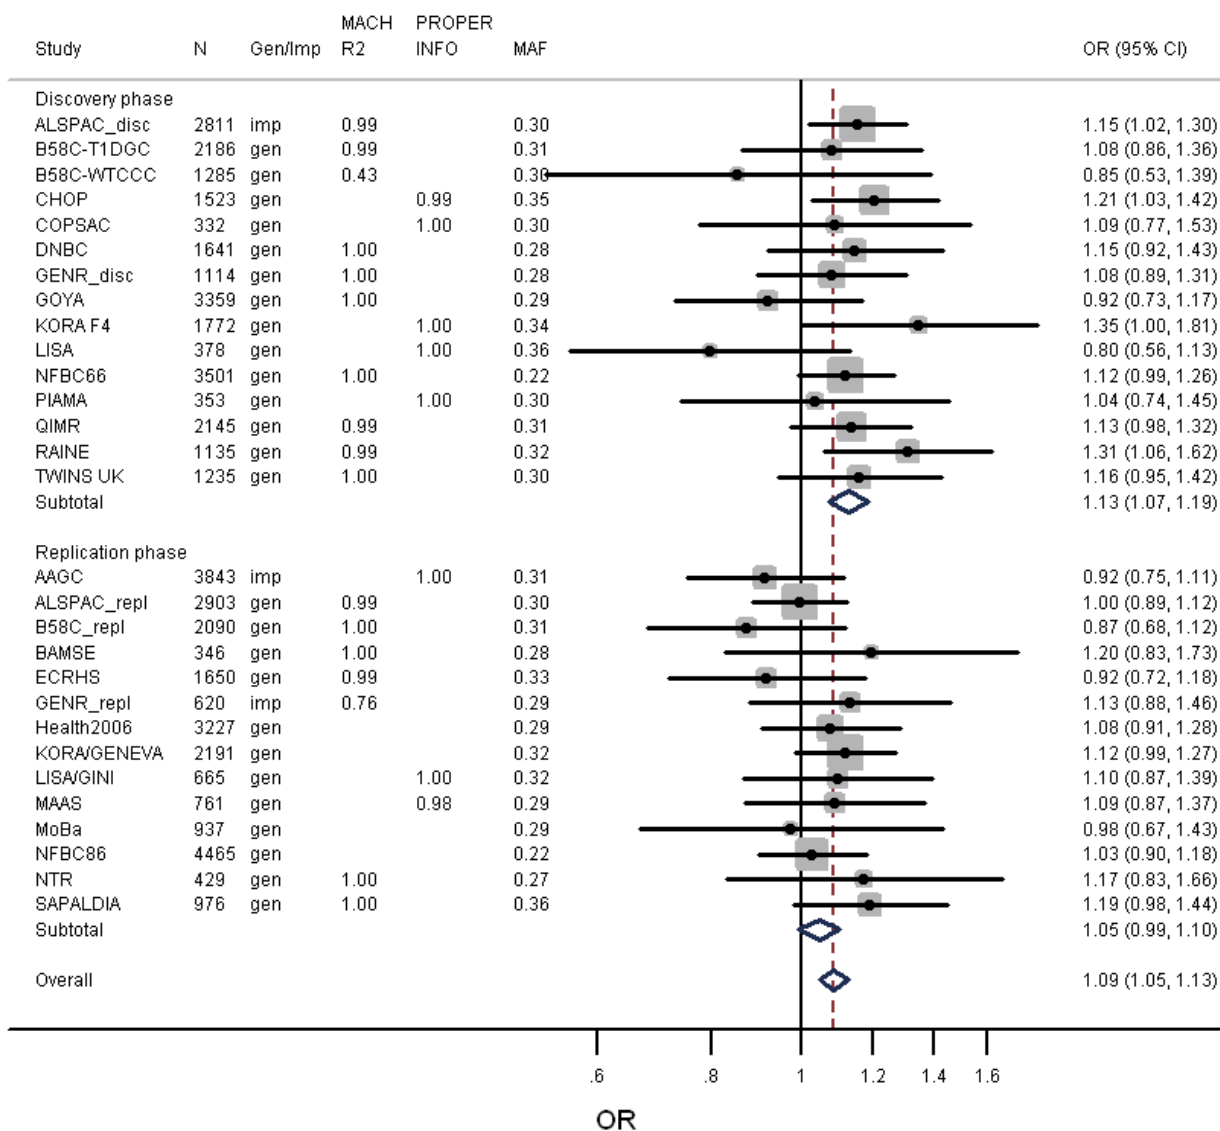

# rs10994675(A)

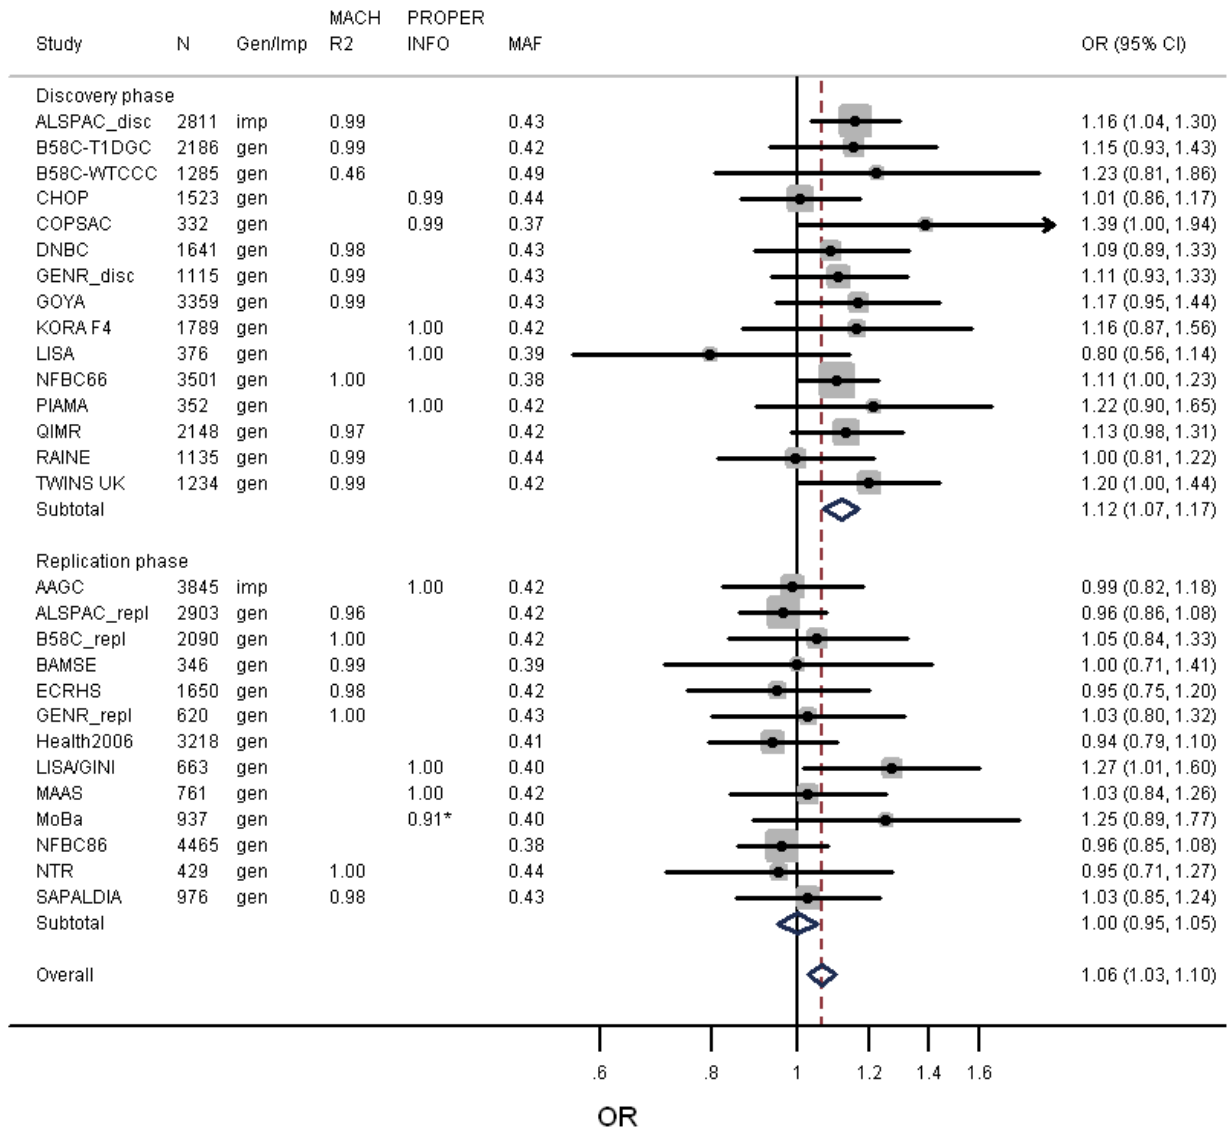

# rs1327914(C)

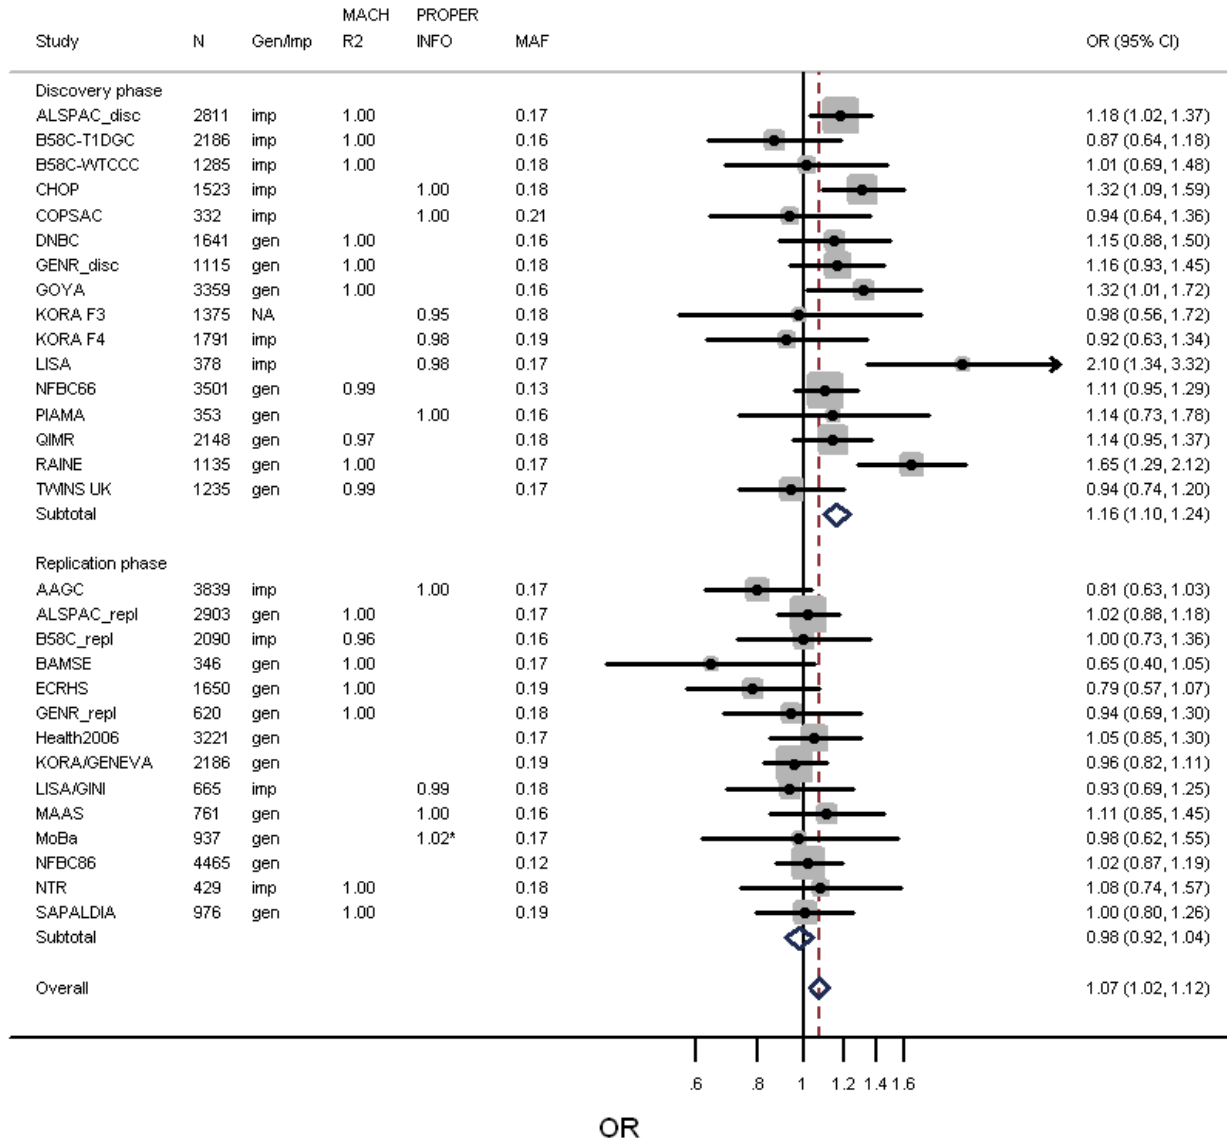

# rs4520482(A)

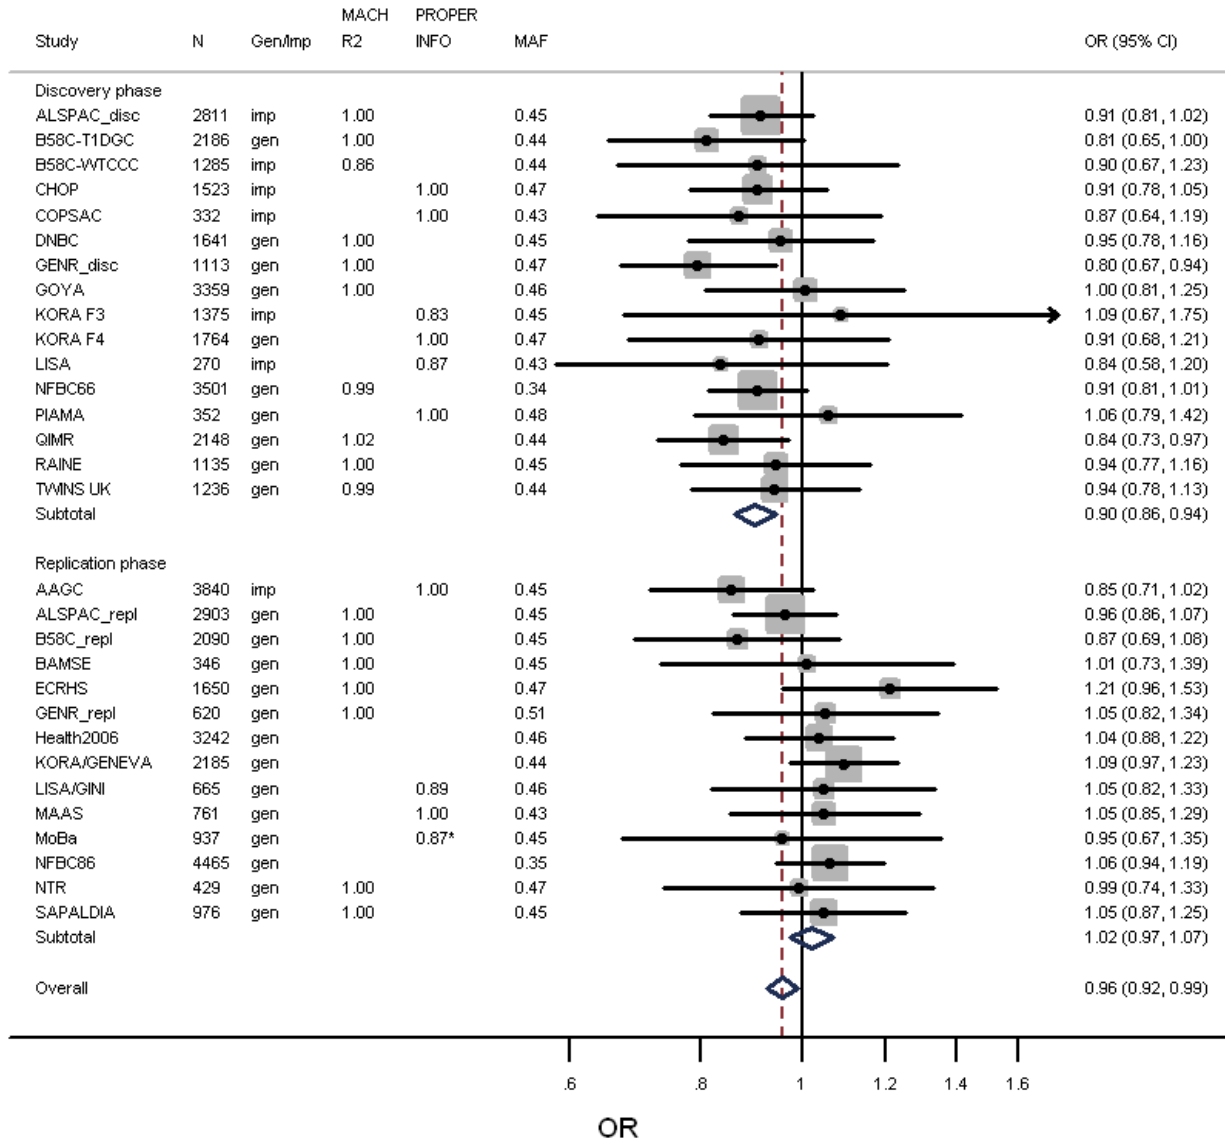

# rs10983837(A)

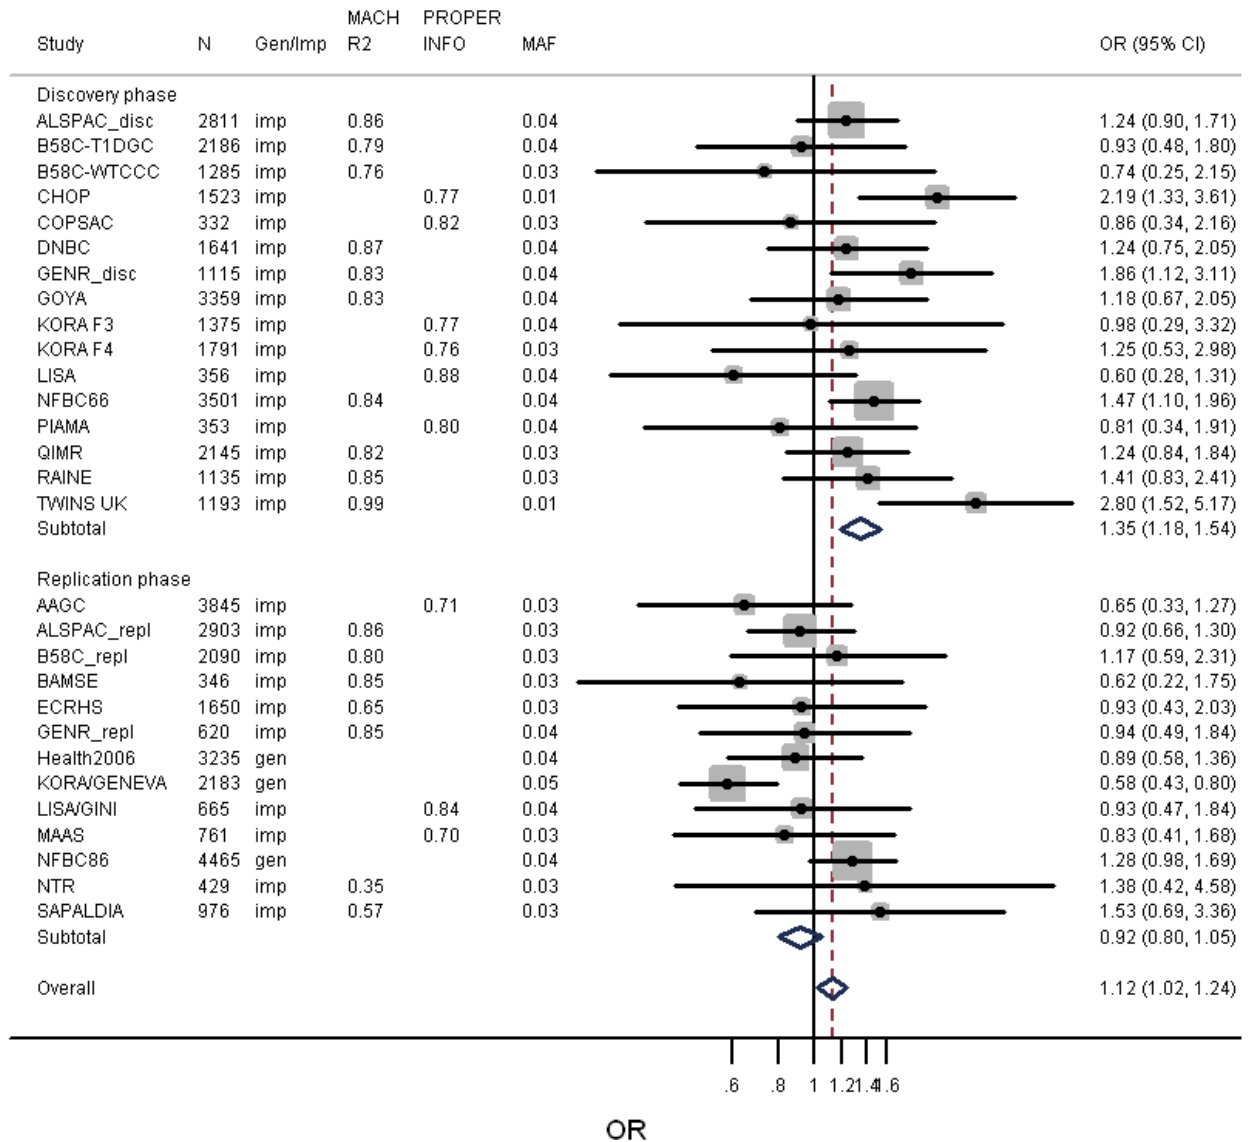

**Supplementary Figure 6. MuTHER pilot eQTL skin data for probes within 1Mb of the SNP (a) rs479844, (b) rs2164983 and (c) rs2897442 for 160 female twins.** Data is split into two sets (with one of each twin pair in each). Results are shown for the candidate genes near to the SNP of interest (*OVOL1*/, *ACTL9/ADAMTS10*, *KIF3A/IL4/IL13*) and for any gene with  $p < 0.01$  (within 1Mb of the SNP) in either twin set.  $r$ =regression coefficient,  $p$ = unadjusted p-value,  $padj$ =adjusted p-value, 10,000 permutations.

**a. rs479884**

i. *OVOL1* – closest gene. Probe=ILMN\_1692936

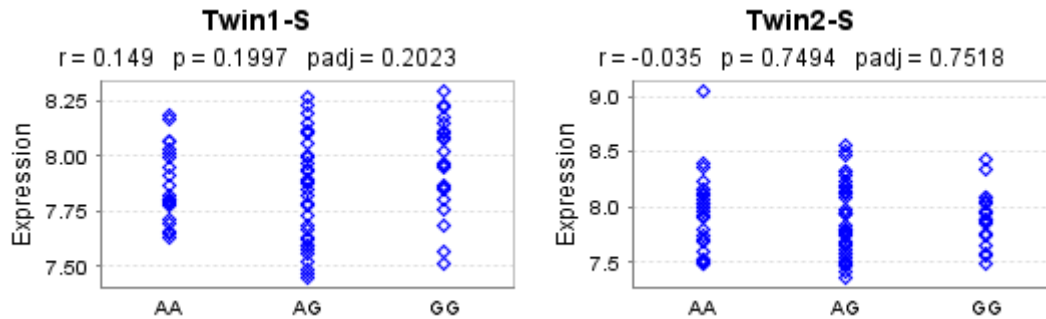

ii. DKFZp761E198 - close gene. Probe=ILMN\_1717594

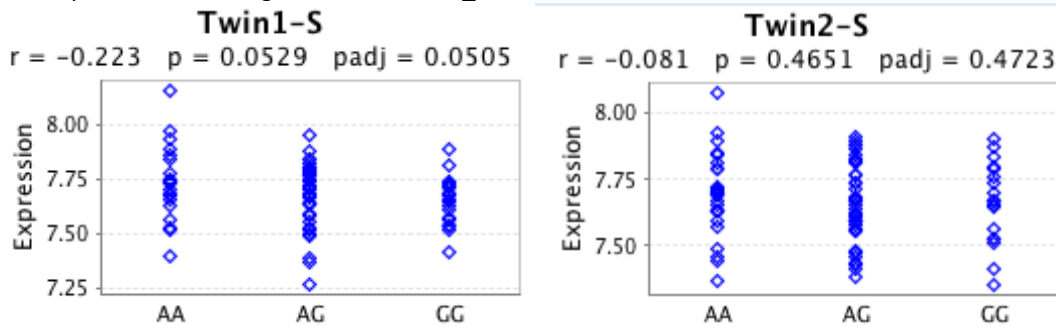

iii. *KLC2* –  $p < 0.01$  in Twin1. Not confirmed in Twin2. Probe=ILMN\_1653470

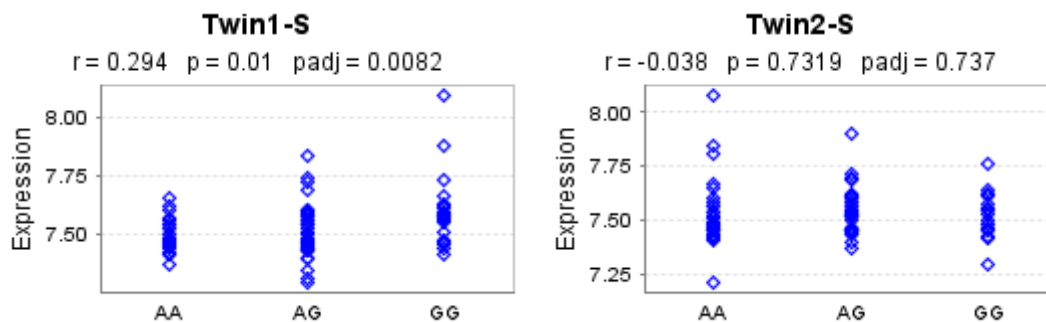

iv. *LTBP3* –  $p < 0.01$  in Twin1. Not confirmed in Twin2. Probe=ILMN\_1777121

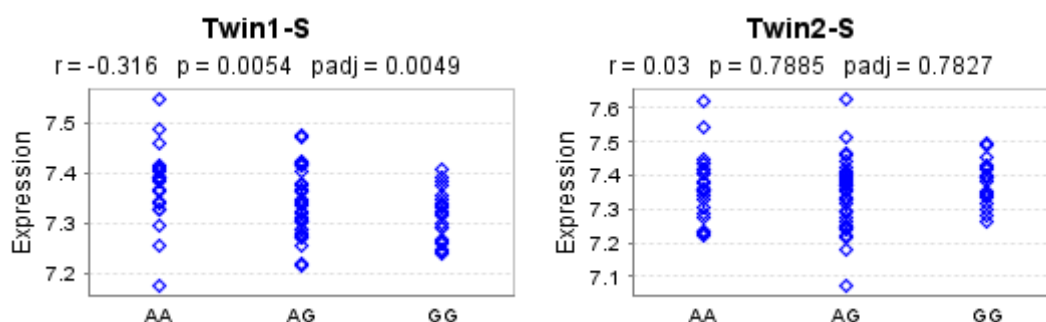

v. *SLC25A45* –  $p < 0.01$  in Twin2. Not confirmed in Twin1. Probe=ILMN\_1810727

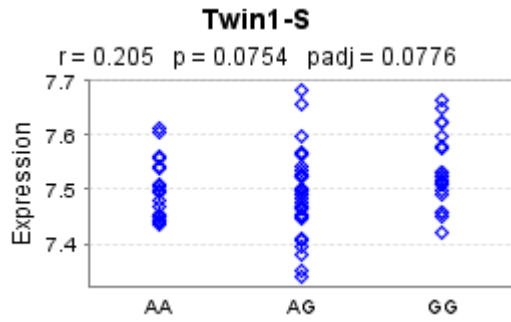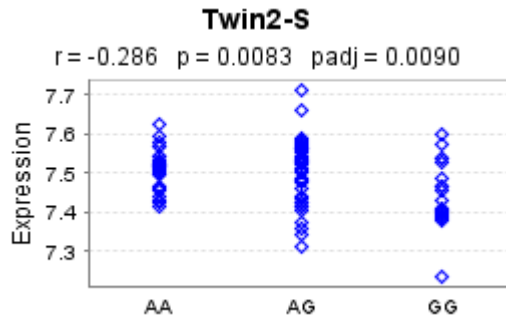

b. rs2967675 – best available proxy for rs2164983 ( $r^2=0.94$ )

i. *ACTL9* – closest gene. Probe=ILMN\_1656193

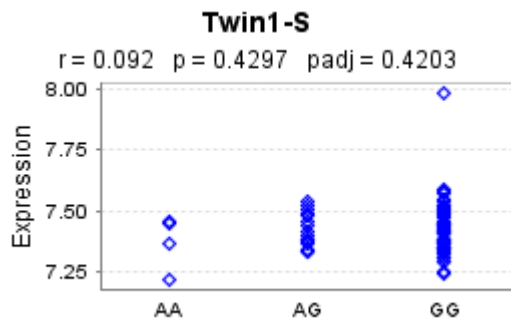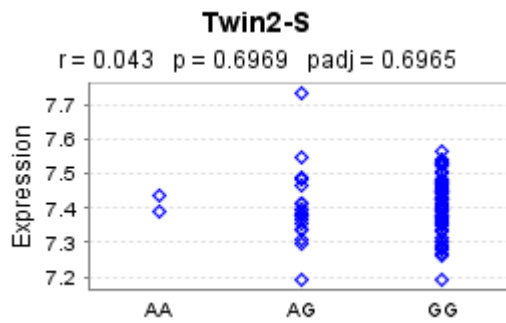

c. rs2299009 – best available proxy for rs2897442 ( $r^2=1.0$ )

i. *KIF3A* – close gene. Probe=ILMN\_1653385

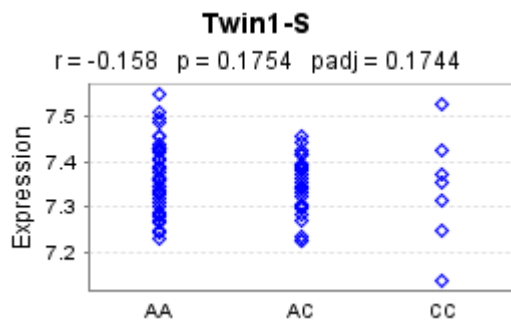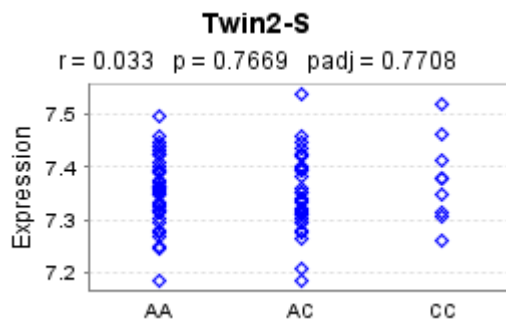

iii. *IL4* -close gene. Probe=ILMN\_1669174

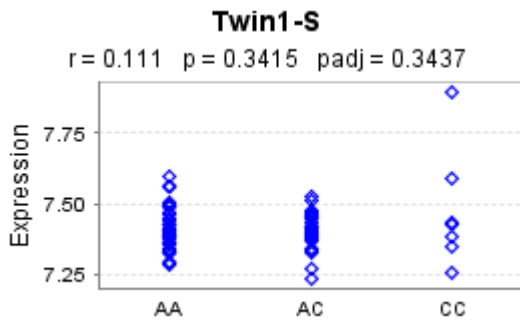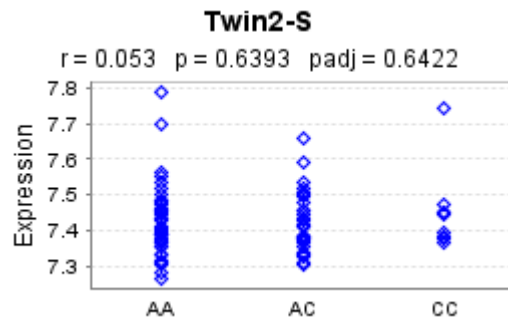

iv. *IL13* – close gene. Probe=ILMN\_2052511

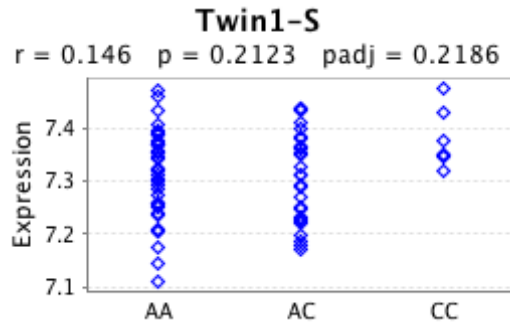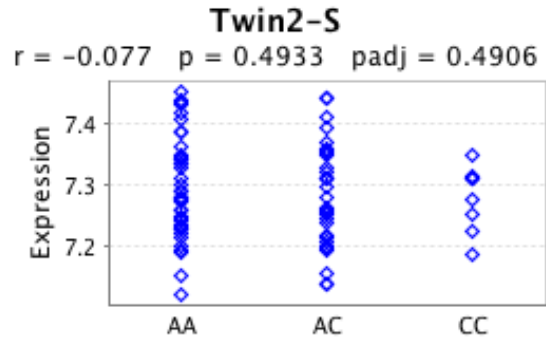

iv. *HSPA4* –  $p < 0.01$  in Twin1. Not confirmed in Twin2. Probe=ILMN\_175513

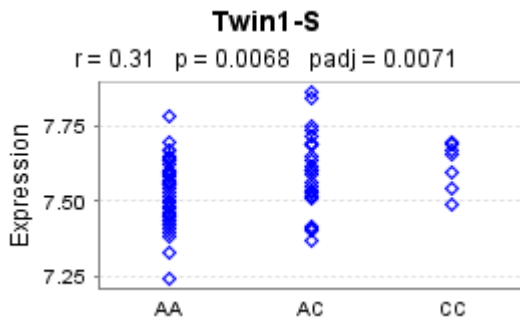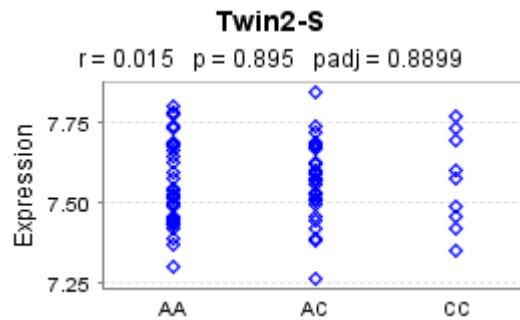





**Supplementary Figure 8. Regional association plot of markers within the cytokine cluster on 5q31.1.** Results from the ImmunoChip (custom genotyping SNP- chip designed for immunogenetic studies) including *IL13* polymorphisms previously shown to be associated with asthma and psoriasis risk, as well as the GWAS *KIF3A* polymorphism showing the strongest association in the meta-analysis and the lead SNP of the corresponding putative LD-block from the finemapping approach.

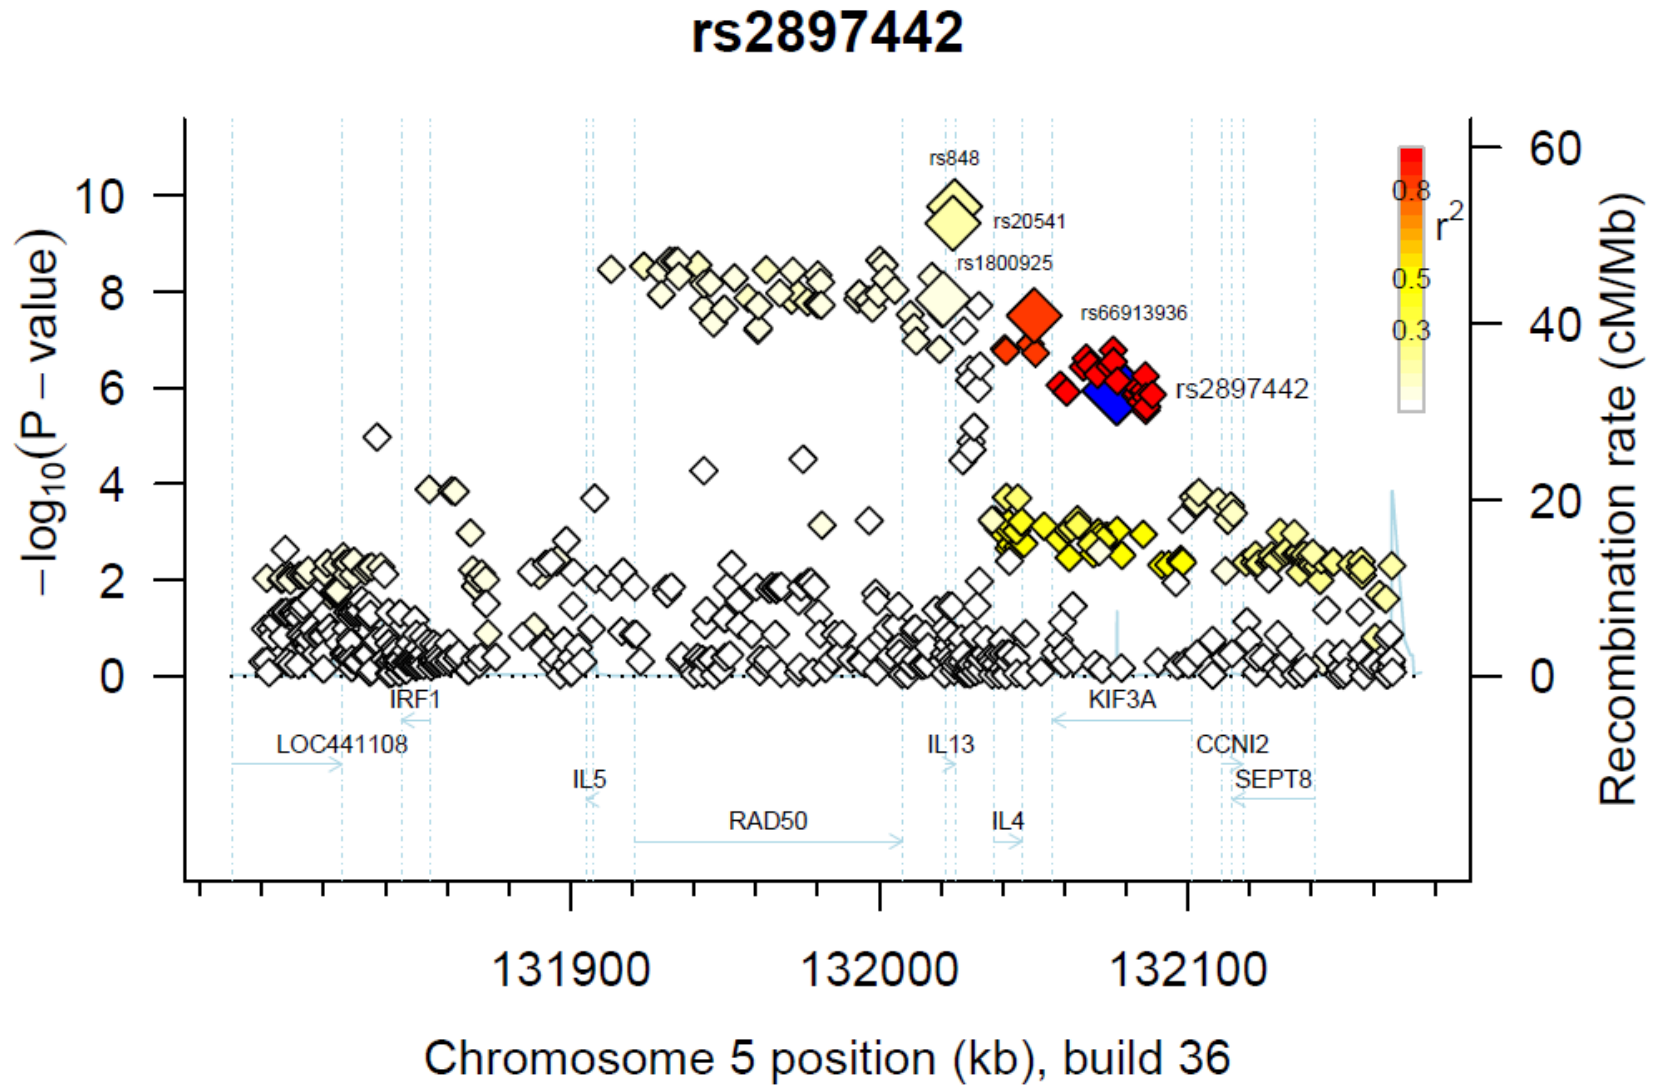

**Supplementary Figure 9. Stratified forest plots for SNPs associated with AD (rs479844, rs2164983, rs2897442) or with evidence of heterogeneity (rs2164983, rs1327914, rs10983837). Stratified by (a) reported physician AD diagnosis versus reported history of AD, (b) diagnosis before the age of 15 (child) versus up to and including adults. GENR = Generation R.**

- a. reported physician AD diagnosis versus reported history of AD.** Difference between subgroup p-values: rs479844 p=0.653; rs2164983 p=0.134; rs2897442 p=0.023; rs1327914 p=0.191; rs10983837 p=0.568.

**rs479844(A) by physician diagnosis/reported history**

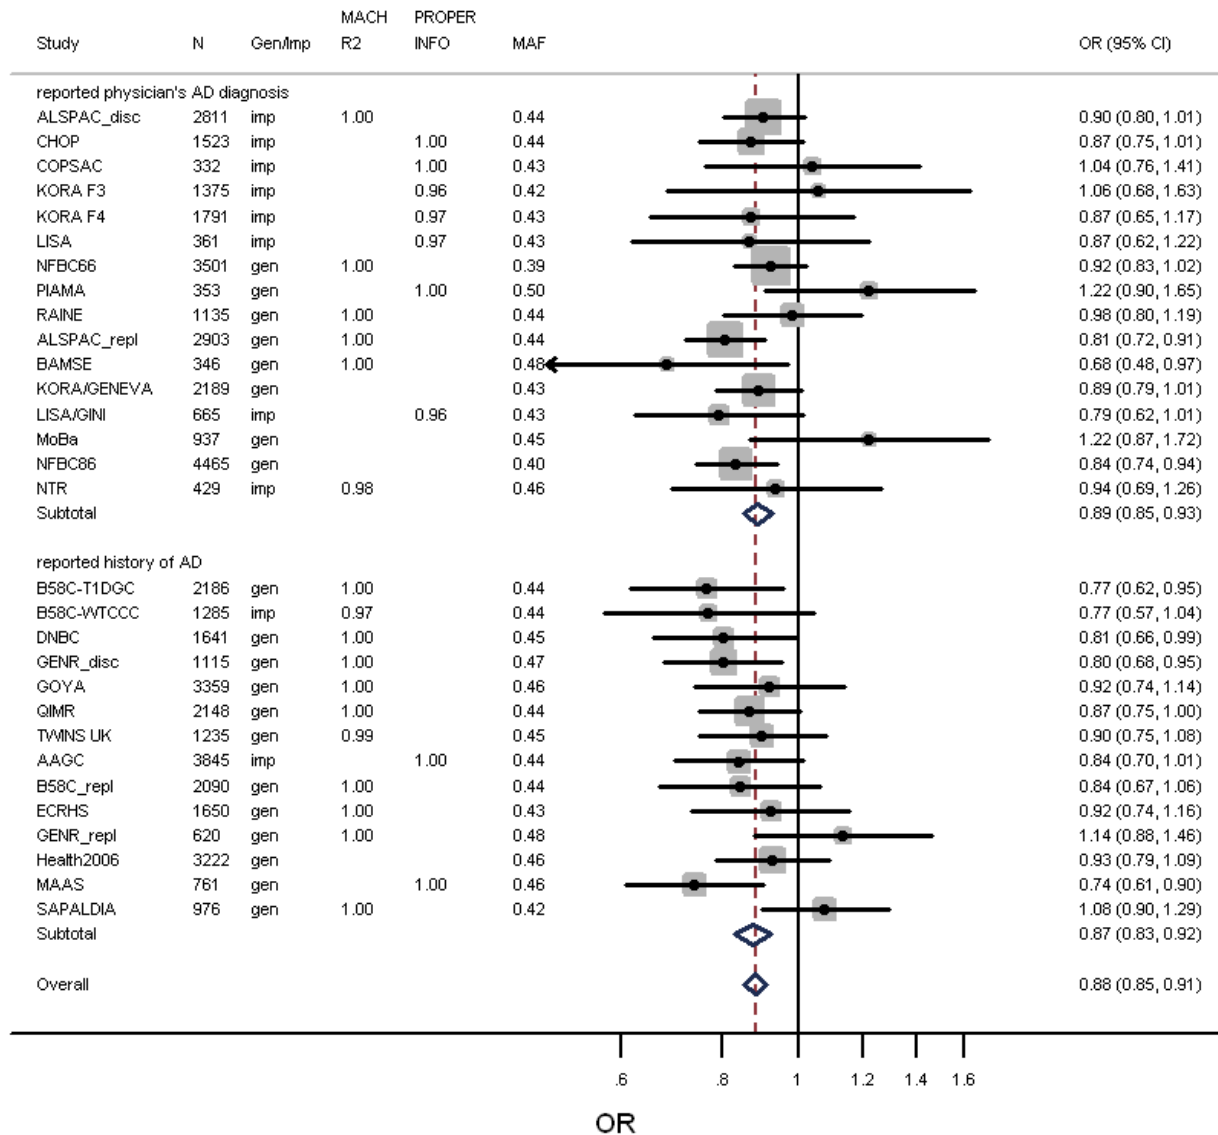

\*CHOP used sub-optimal ICD9 diagnosis in medical record to identify cases. Reported physician's AD diagnosis subgroup result with CHOP excluded: OR=0.89 (95%CI 0.85 - 0.93).

## rs2164983(A) by physician diagnosis/reported history

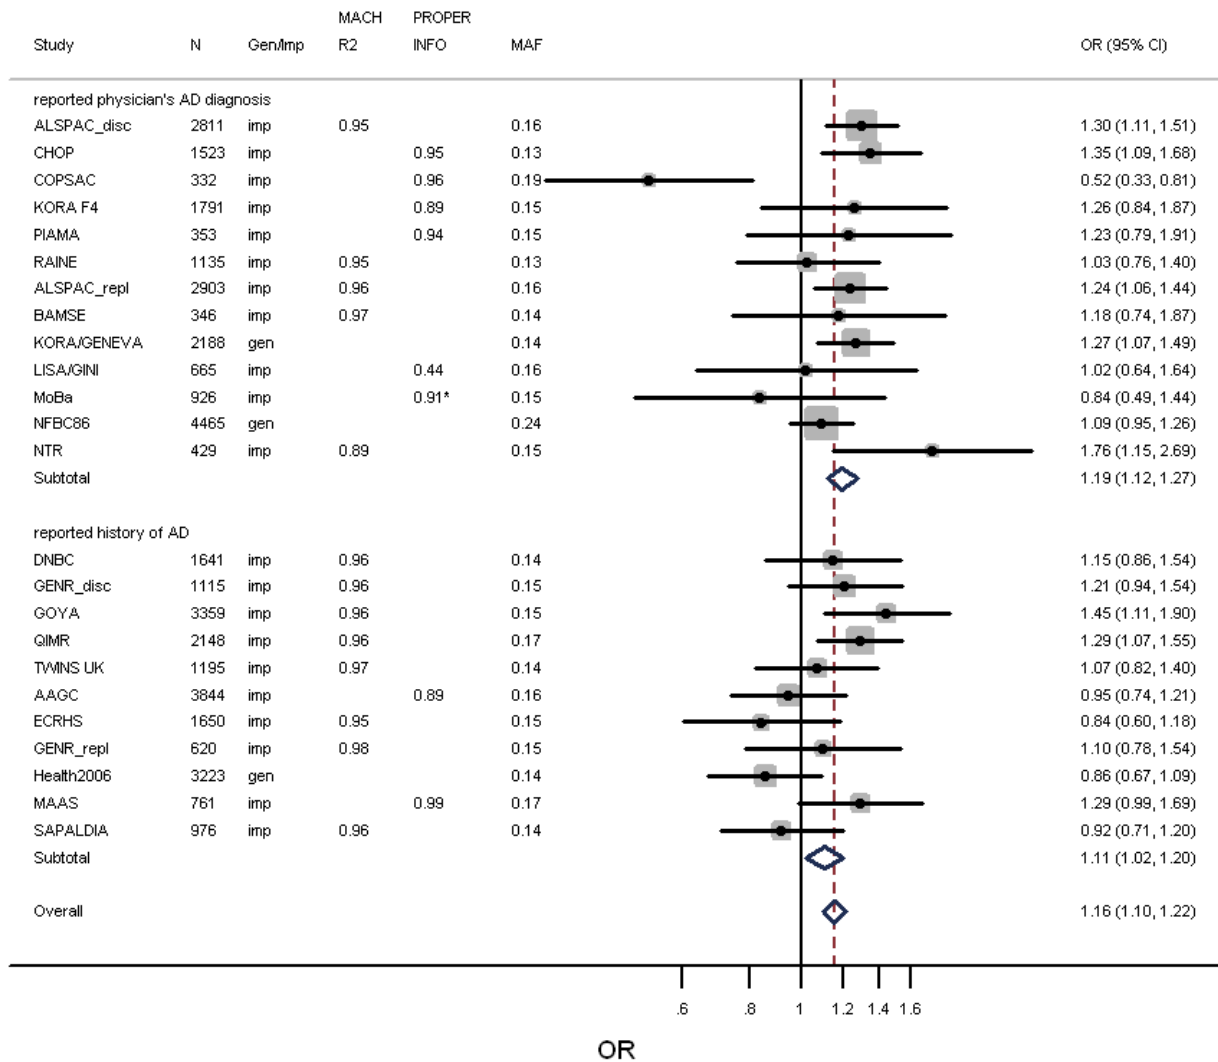

\*CHOP used sub-optimal ICD9 diagnosis in medical record to identify cases. Reported physician's AD diagnosis subgroup result with CHOP excluded: OR=1.18 (95%CI 1.10 - 1.26).

## rs2897442(C) by physician diagnosis/reported history

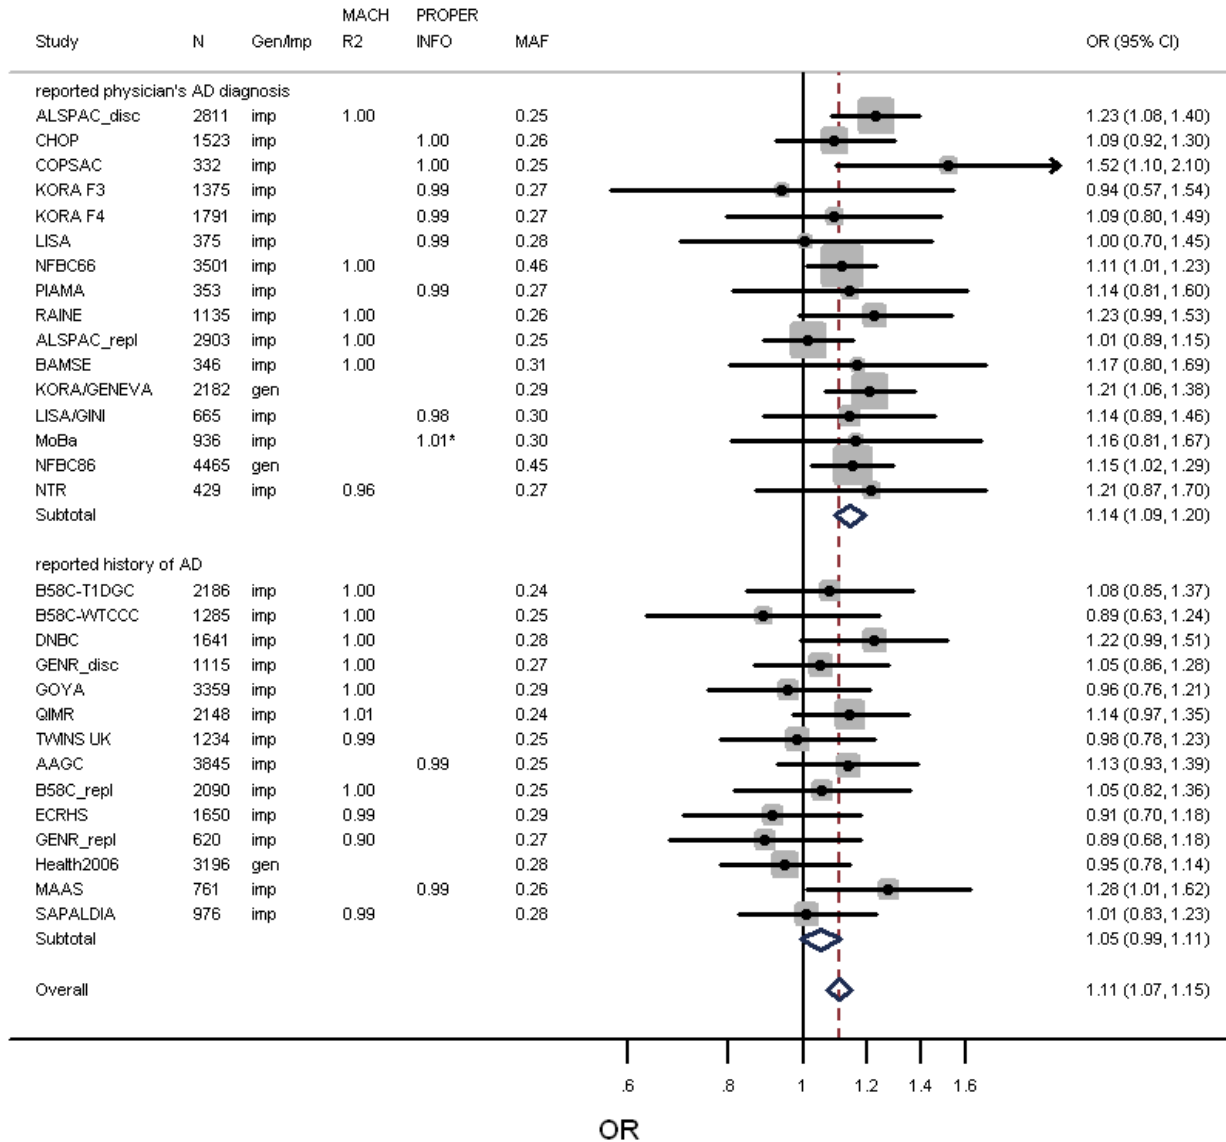

\*CHOP used sub-optimal ICD9 diagnosis in medical record to identify cases. Reported physician's AD diagnosis subgroup result with CHOP excluded: OR=1.15 (95%CI 1.09 - 1.20).

## rs1327914(C) by physician diagnosis/reported history

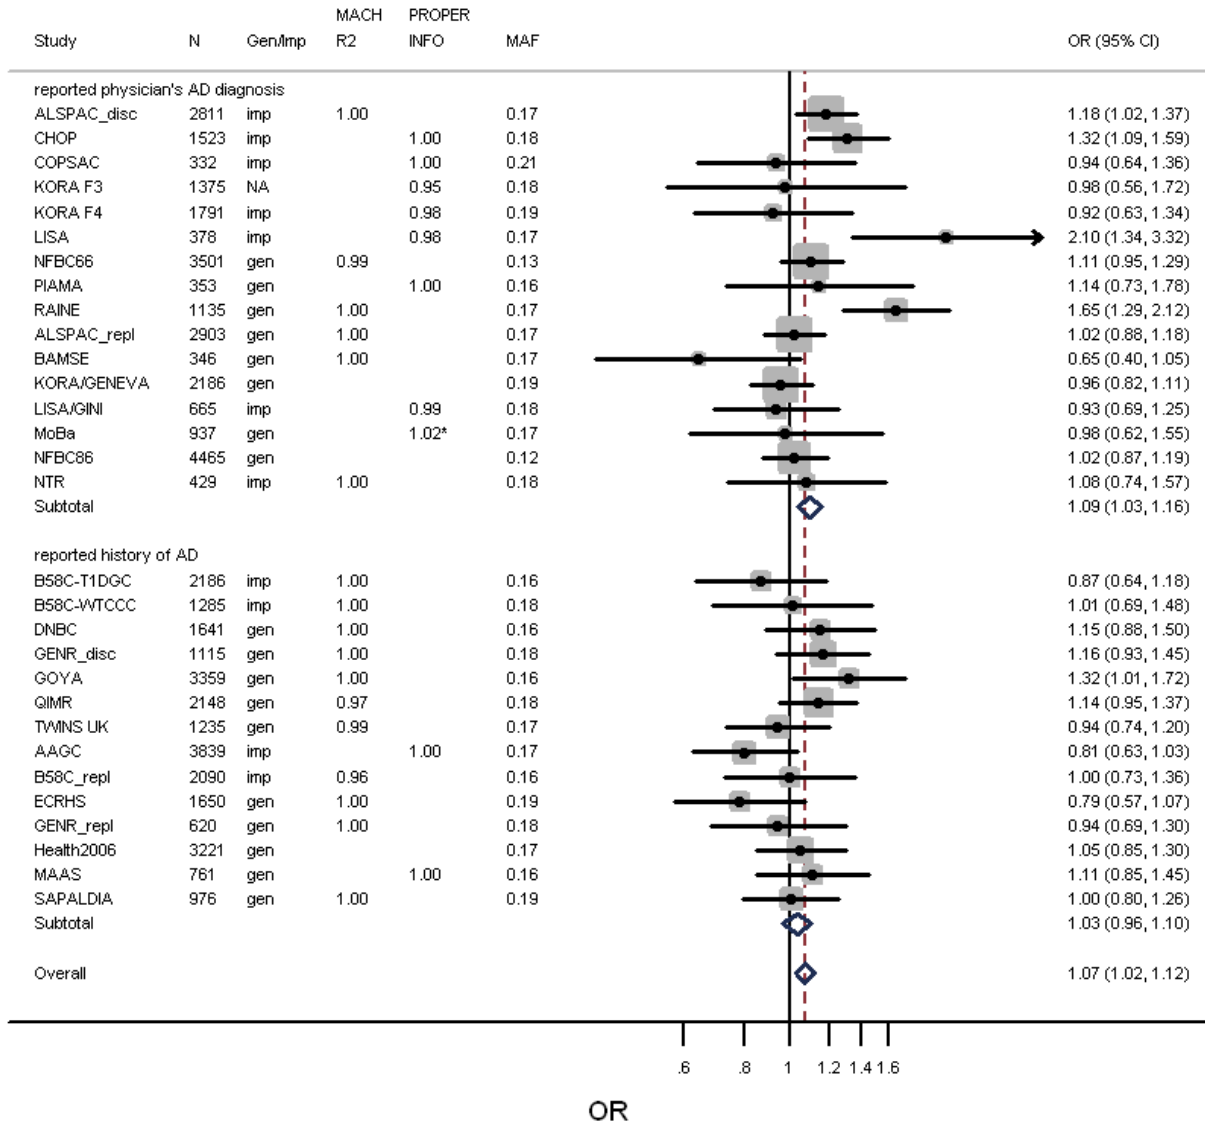

\*CHOP used sub-optimal ICD9 diagnosis in medical record to identify cases. Reported physician's AD diagnosis subgroup result with CHOP excluded: OR=1.07 (95%CI 1.01 - 1.14).

## rs10983837(A) by physician diagnosis/reported history

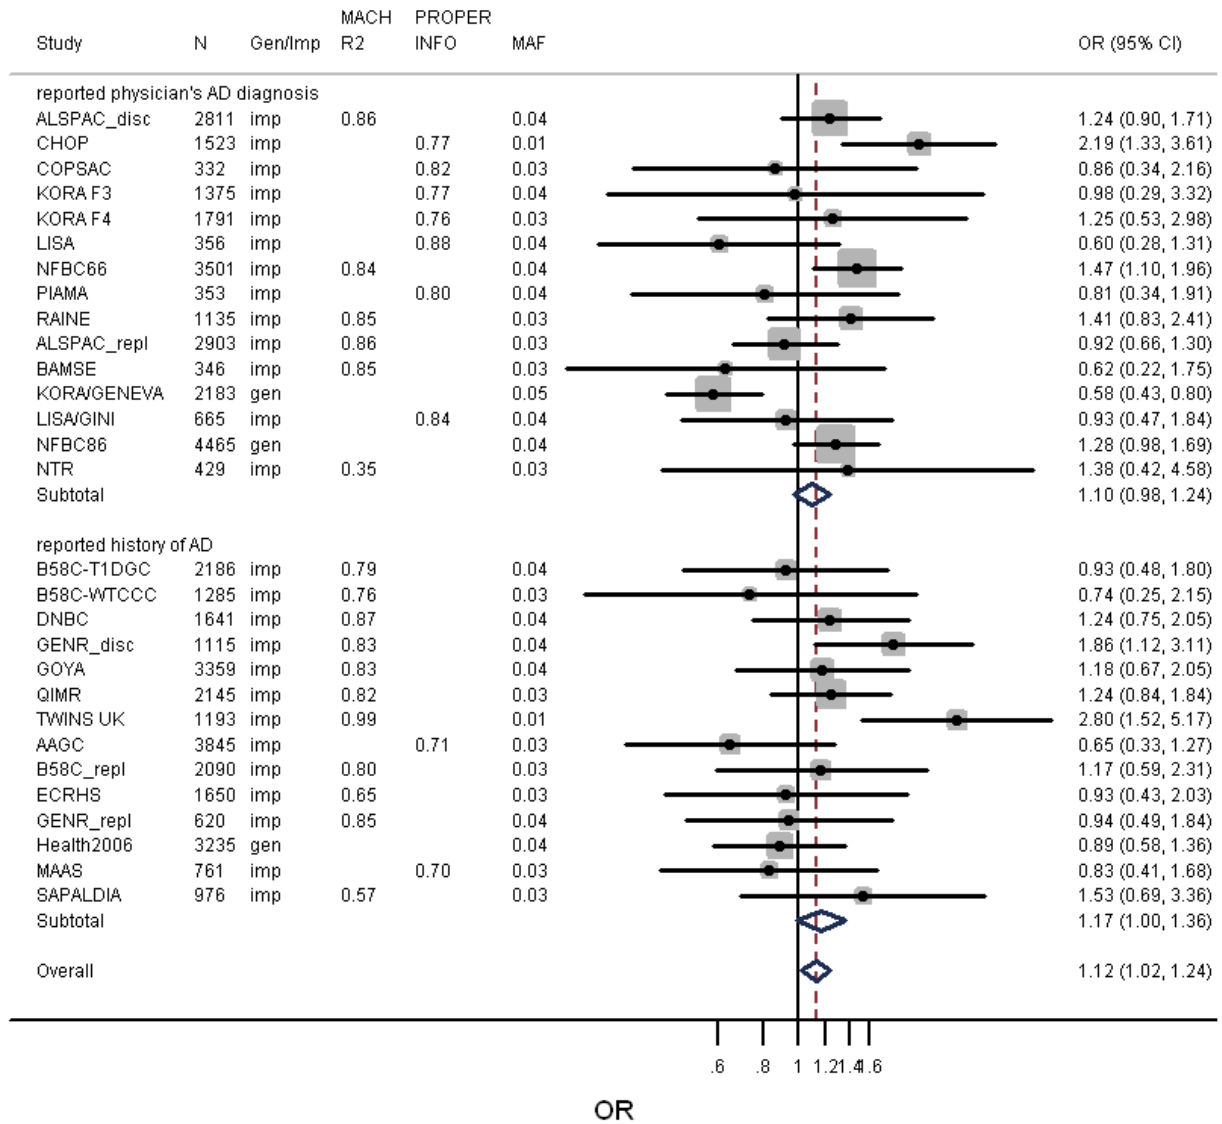

\*CHOP used sub-optimal ICD9 diagnosis in medical record to identify cases. Reported physician's AD diagnosis subgroup result with CHOP excluded: OR=1.06 (95%CI 0.94 - 1.19).

**b. diagnosis before the age of 15 (child) versus up to and including adults.** Difference between subgroup p-values: rs479844 p=0.224; rs2164983 p=0.037; rs2897442 p=0.465; rs1327914 p=0.028; rs10983837 p=0.773.

### rs479844(A) by child/adult

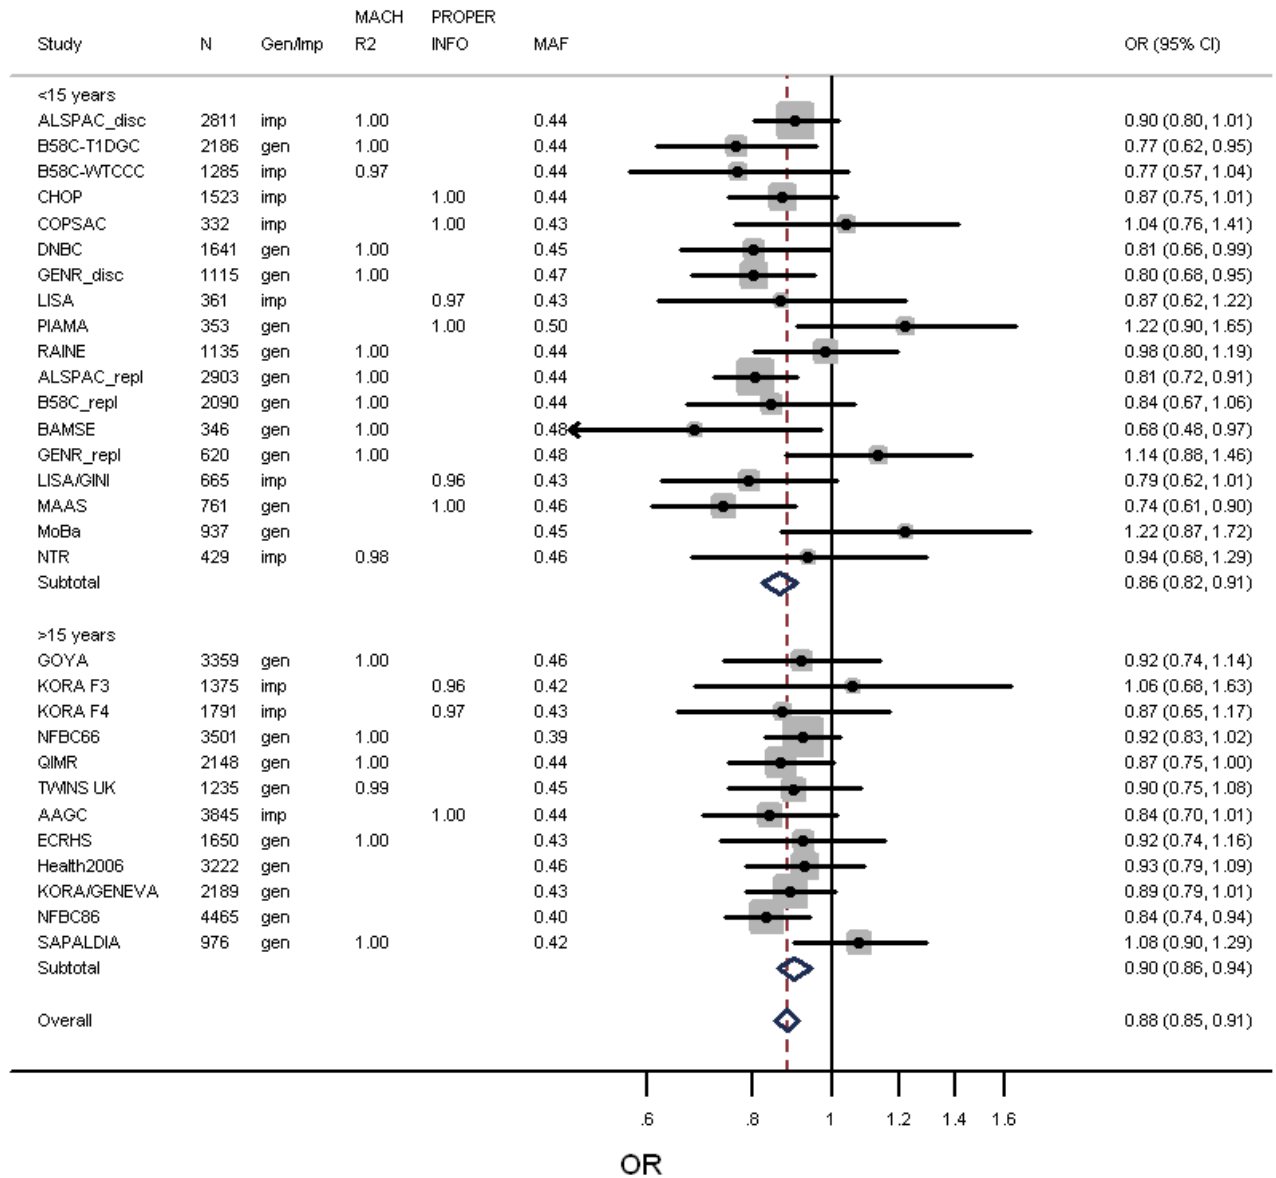



## rs2164983(A) by child/adult

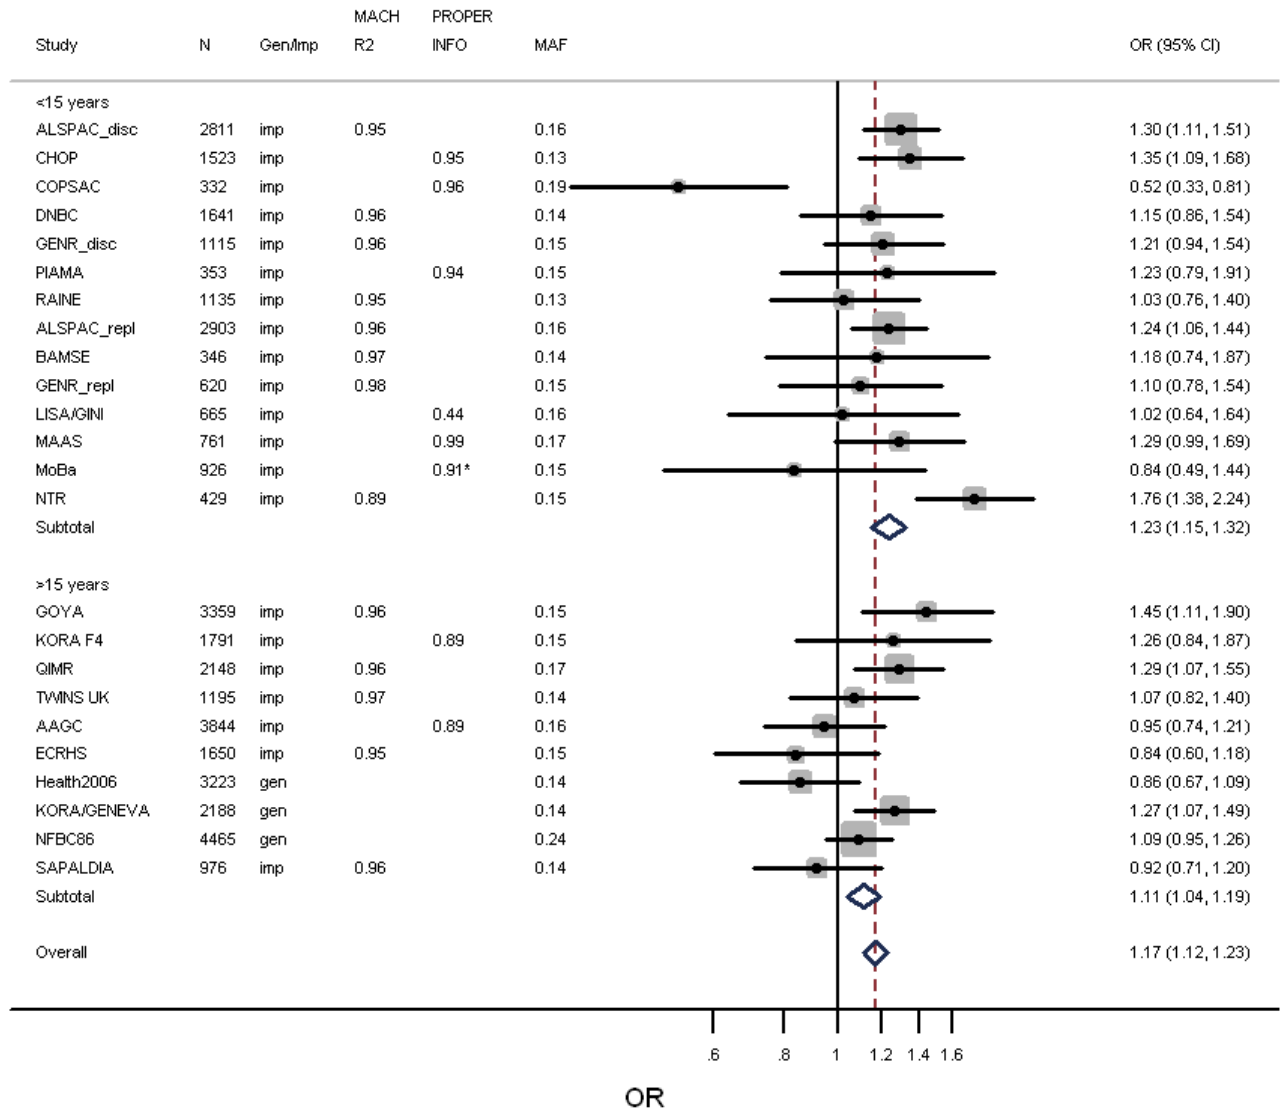

## rs2897442(C) by child/adult

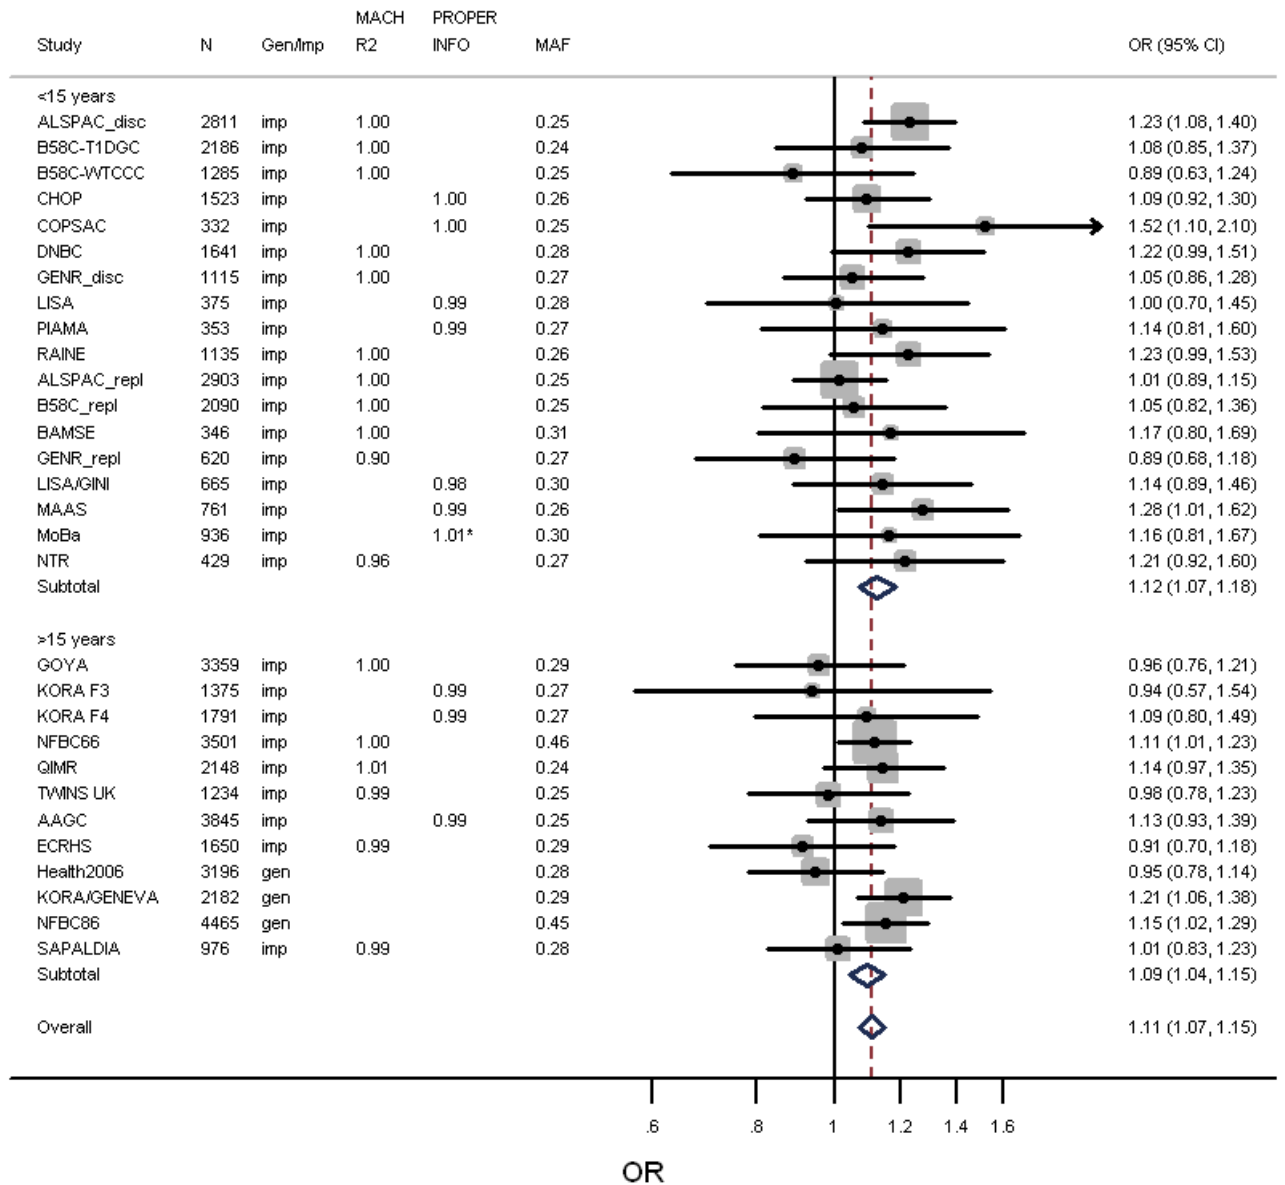

## rs1327914(C) by child/adult

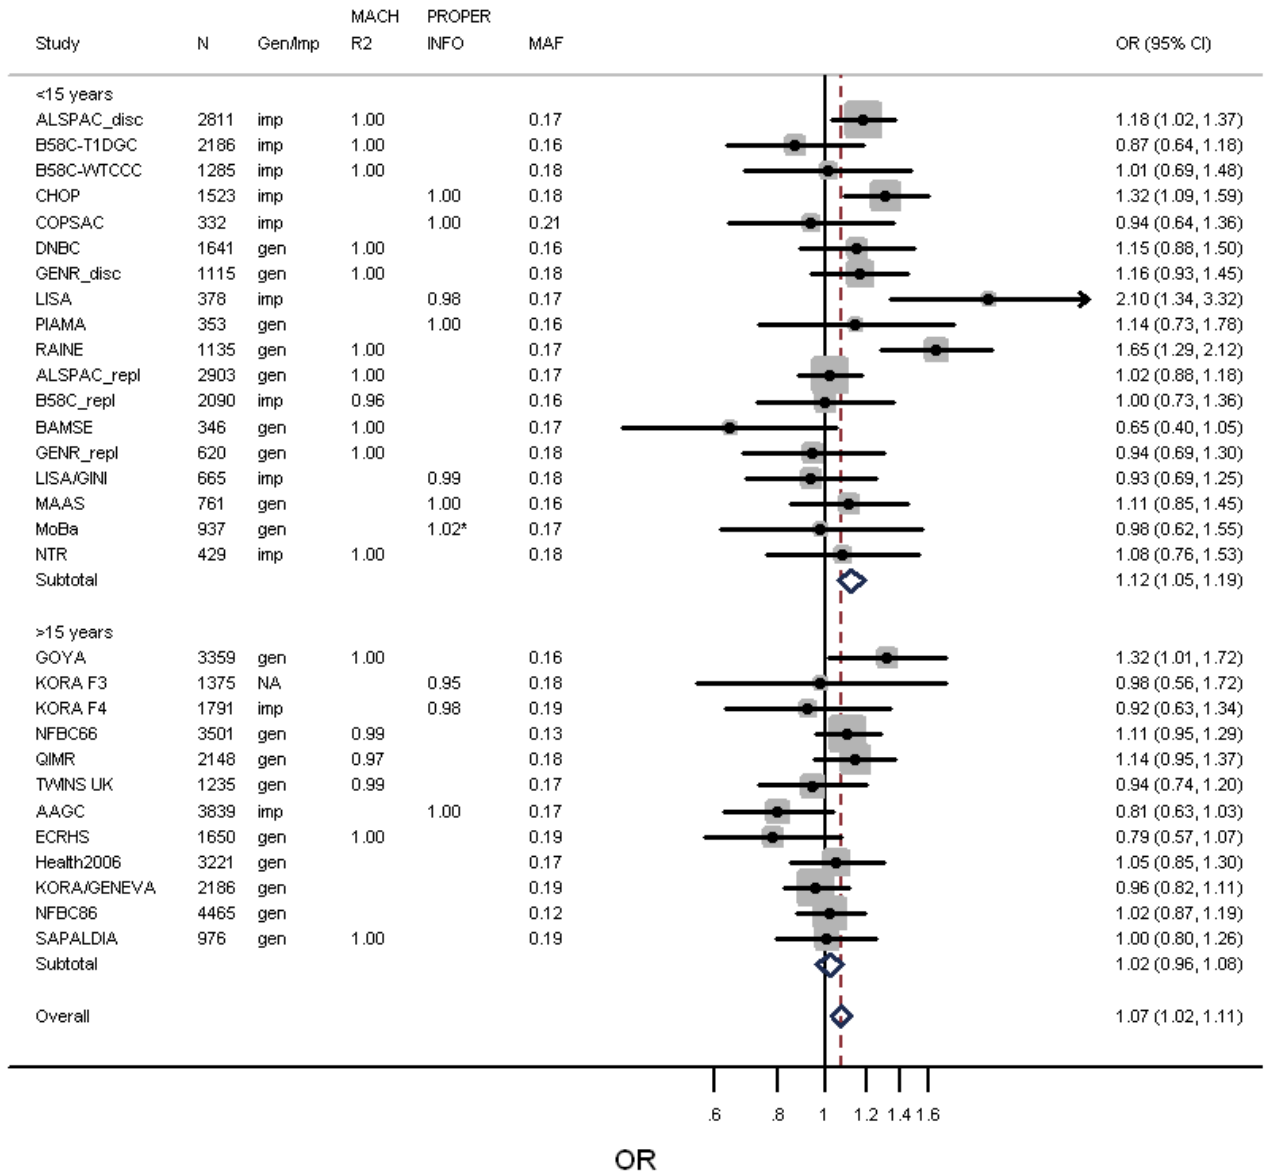

## rs10983837(A) by child/adult

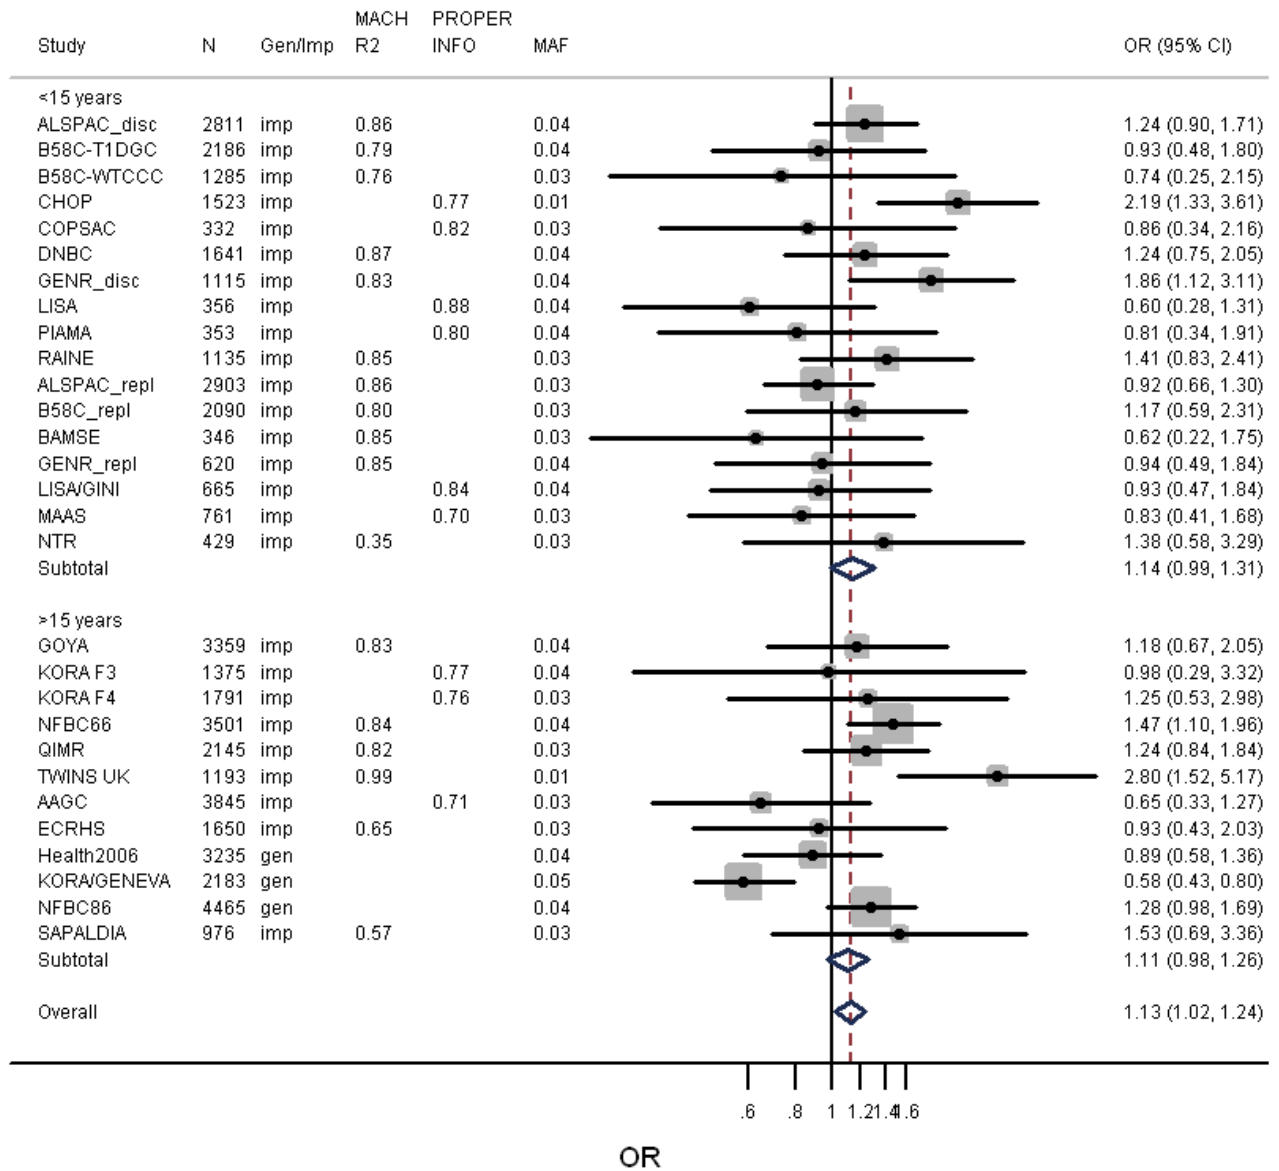

## Supplementary References

- 1 Johansson SGO *et al.* Revised nomenclature for allergy for global use: Report of the Nomenclature Review Committee of the World Allergy Organization, October 2003. *J Allergy Clin Immunol.* **113**, 832–836 (2004).
- 2 Golding J, Pembrey M, Jones R, Team ALSPACS. ALSPAC—the Avon Longitudinal Study of Parents and Children. I. Study methodology. *Paediatr Perinat Epidemiol.* **15**, 74–87 (2001).
- 3 Li Y, Willer C, Sanna S, Abecasis G. Genotype imputation. *Annu Rev Genomics Hum Genet.* **10**, 387–406 (2009).
- 4 Li Y, Willer CJ, Ding J, Scheet P, Abecasis GR. MaCH: using sequence and genotype data to estimate haplotypes and unobserved genotypes. *Genet Epidemiol.* **34**, 816–834 (2010).
- 5 Henderson J *et al.* The burden of disease associated with filaggrin mutations: a population-based, longitudinal birth cohort study. *J Allergy Clin Immunol.* **121**, 872–7.e9 (2008).
- 6 Kull I *et al.* Breast-feeding in relation to asthma, lung function, and sensitization in young schoolchildren. *J Allergy Clin Immunol.* **125**, 1013–1019 (2010).
- 7 Moffatt MF *et al.* A large-scale, consortium-based genomewide association study of asthma. *N Engl J Med.* **363**, 1211–1221 (2010).
- 8 Aulchenko YS, Struchalin MV, van Duijn CM. ProbABEL package for genome-wide association analysis of imputed data. *BMC Bioinformatics.* **11**, 134 (2010).
- 9 Williams HC, Strachan DP, Hay RJ. Childhood eczema: disease of the advantaged? *BMJ.* **308**, 1132–1135 (1994).
- 10 Strachan DP *et al.* Lifecourse influences on health among British adults: effects of region of residence in childhood and adulthood. *Int J Epidemiol.* **36**, 522–531 (2007).
- 11 Wellcome Trust Case Control Consortium. Genome-wide association study of 14,000 cases of seven common diseases and 3,000 shared controls. *Nature.* **447**, 661–678 (2007).
- 12 Barrett JC *et al.* Genome-wide association study and meta-analysis find that over 40 loci affect risk of type 1 diabetes. *Nat Genet.* **41**, 703–707 (2009).
- 13 Bisgaard H. The Copenhagen Prospective Study on Asthma in Childhood (COPSAC): design, rationale, and baseline data from a longitudinal birth cohort study. *Ann Allergy Asthma Immunol.* **93**, 381–389 (2004).
- 14 Bisgaard H, Hermansen MN, Loland L, Halkjaer LB, Buchvald F. Intermittent inhaled corticosteroids in infants with episodic wheezing. *N Engl J Med.* **354**, 1998–2005 (2006).
- 15 Bisgaard H *et al.* Childhood asthma after bacterial colonization of the airway in neonates. *N Engl J Med.* **357**, 1487–1495 (2007).
- 16 Bisgaard H *et al.* Gene-environment interaction in the onset of eczema in infancy: filaggrin loss-of-function mutations enhanced by neonatal cat exposure. *PLoS Med.* **5**, e131 (2008).
- 17 Halkjaer LB *et al.* Development of atopic dermatitis during the first 3 years of life: the Copenhagen prospective study on asthma in childhood cohort study in high-risk children. *Arch Dermatol.* **142**, 561–566 (2006).

- 18 Palmer CNA *et al.* Common loss-of-function variants of the epidermal barrier protein filaggrin are a major predisposing factor for atopic dermatitis. *Nat Genet.* **38**, 441–446 (2006).
- 19 Hakonarson H *et al.* A genome-wide association study identifies KIAA0350 as a type 1 diabetes gene. *Nature.* **448**, 591–594 (2007).
- 20 Olsen J *et al.* The Danish National Birth Cohort—its background, structure and aim. *Scand J Public Health.* **29**, 300–307 (2001).
- 21 Benn CS *et al.* Atopic dermatitis in young children: diagnostic criteria for use in epidemiological studies based on telephone interviews. *Acta Derm Venereol.* **83**, 347–350 (2003).
- 22 Burney PG, Luczynska C, Chinn S, Jarvis D. The European Community Respiratory Health Survey. *Eur Respir J.* **7**, 954–960 (1994).
- 23 European Community Respiratory Health Survey II Steering Committee. The European Community Respiratory Health Survey II. *Eur Respir J.* **20**, 1071–1079 (2002).
- 24 Harrop J *et al.* Eczema, atopy and allergen exposure in adults: a population-based study. *Clin Exp Allergy.* **37**, 526–535 (2007).
- 25 Jaddoe VWV *et al.* The Generation R Study Biobank: a resource for epidemiological studies in children and their parents. *Eur J Epidemiol.* **22**, 917–923 (2007).
- 26 Jaddoe VWV *et al.* The Generation R Study: design and cohort update 2010. *Eur J Epidemiol.* **25**, 823–841 (2010).
- 27 Estrada K *et al.* GRIMP: a web- and grid-based tool for high-speed analysis of large-scale genome-wide association using imputed data. *Bioinformatics.* **25**, 2750–2752 (2009).
- 28 Nohr EA *et al.* Severe obesity in young women and reproductive health: the Danish National Birth Cohort. *PLoS ONE.* **4**, e8444 (2009).
- 29 Paternoster L *et al.* Genome-Wide Population-Based Association Study of Extremely Overweight Young Adults – The GOYA Study. *PLoS ONE.* **6**, e24303 (2011).
- 30 Thyssen JP, Linneberg A, Menné T, Nielsen NH, Johansen JD. The prevalence and morbidity of sensitization to fragrance mix I in the general population. *Br J Dermatol.* **161**, 95–101 (2009).
- 31 Thyssen JP, Linneberg A, Menné T, Nielsen NH, Johansen JD. The effect of tobacco smoking and alcohol consumption on the prevalence of self-reported hand eczema: a cross-sectional population-based study. *Br J Dermatol.* **162**, 619–626 (2010).
- 32 Holle R, Happich M, Löwel H, Wichmann HE, MONICA/KORA Study Group. KORA—a research platform for population based health research. *Gesundheitswesen.* **67** Suppl 1, S19–S25 (2005).
- 33 Wichmann HE, Gieger C, Illig T, MONICA/KORA Study Group. KORA-gen—resource for population genetics, controls and a broad spectrum of disease phenotypes. *Gesundheitswesen.* **67** Suppl 1, S26–S30 (2005).
- 34 Esparza-Gordillo J *et al.* A common variant on chromosome 11q13 is associated with atopic dermatitis. *Nat Genet.* **41**, 596–601 (2009).
- 35 Williams HC *et al.* The U.K. Working Party’s Diagnostic Criteria for Atopic Dermatitis. I. Derivation of a minimum set of discriminators for atopic dermatitis. *Br J Dermatol.* **131**, 383–396 (1994).

- 36 Heinrich J *et al.* Allergens and endotoxin on mothers' mattresses and total immunoglobulin E in cord blood of neonates. *Eur Respir J.* **20**, 617–623 (2002).
- 37 von Berg A *et al.* The effect of hydrolyzed cow's milk formula for allergy prevention in the first year of life: the German Infant Nutritional Intervention Study, a randomized double-blind trial. *J Allergy Clin Immunol.* **111**, 533–540 (2003).
- 38 Marchini J, Howie B, Myers S, McVean G, Donnelly P. A new multipoint method for genome-wide association studies by imputation of genotypes. *Nat Genet.* **39**, 906–913 (2007).
- 39 Howie BN, Donnelly P, Marchini J. A flexible and accurate genotype imputation method for the next generation of genome-wide association studies. *PLoS Genet.* **5**, e1000529 (2009).
- 40 Custovic A, Simpson BM, Murray CS, Lowe L, Woodcock A, N A C Manchester Asthma and Allergy Study Group. The National Asthma Campaign Manchester Asthma and Allergy Study. *Pediatr Allergy Immunol.* **13** Suppl 15, 32–37 (2002).
- 41 Lowe LA *et al.* Wheeze phenotypes and lung function in preschool children. *Am J Respir Crit Care Med.* **171**, 231–237 (2005).
- 42 Murray CS *et al.* Lung function at one month of age as a risk factor for infant respiratory symptoms in a high risk population. *Thorax.* **57**, 388–392 (2002).
- 43 Nicolaou NC *et al.* Exhaled breath condensate pH and childhood asthma: unselected birth cohort study. *Am J Respir Crit Care Med.* **174**, 254–259 (2006).
- 44 Nicolaou NC *et al.* Day-care attendance, position in sibship, and early childhood wheezing: a population-based birth cohort study. *J Allergy Clin Immunol.* **122**, 500–6.e5 (2008).
- 45 Magnus P *et al.* Cohort profile: the Norwegian Mother and Child Cohort Study (MoBa). *Int J Epidemiol.* **35**, 1146–1150 (2006).
- 46 Rønningen KS *et al.* The biobank of the Norwegian Mother and Child Cohort Study: a resource for the next 100 years. *Eur J Epidemiol.* **21**, 619–625 (2006).
- 47 Rantakallio P. The longitudinal study of the northern Finland birth cohort of 1966. *Paediatr Perinat Epidemiol.* **2**, 59–88 (1988).
- 48 Sovio U *et al.* Genetic determinants of height growth assessed longitudinally from infancy to adulthood in the northern Finland birth cohort 1966. *PLoS Genet.* **5**, e1000409 (2009).
- 49 Frayling TM *et al.* A common variant in the FTO gene is associated with body mass index and predisposes to childhood and adult obesity. *Science.* **316**, 889–894 (2007).
- 50 Sabatti C *et al.* Genome-wide association analysis of metabolic traits in a birth cohort from a founder population. *Nat Genet.* **41**, 35–46 (2009).
- 51 Järvelin MR, Hartikainen-Sorri AL, Rantakallio P. Labour induction policy in hospitals of different levels of specialisation. *Br J Obstet Gynaecol.* **100**, 310–315 (1993).
- 52 Boomsma DI *et al.* Netherlands Twin Register: from twins to twin families. *Twin Res Hum Genet.* **9**, 849–857 (2006).
- 53 van Beijsterveldt CEM, Boomsma DI. Genetics of parentally reported asthma, eczema and rhinitis in 5-yr-old twins. *Eur Respir J.* **29**, 516–521 (2007).

- 54 Brunekreef B *et al.* The prevention and incidence of asthma and mite allergy (PIAMA) birth cohort study: design and first results. *Pediatr Allergy Immunol.* **13** Suppl 15, 55–60 (2002).
- 55 Ferreira MAR *et al.* Association between ORM DL3, IL1RL1 and a deletion on chromosome 17q21 with asthma risk in Australia. *Eur J Hum Genet.* **19**, 458–464 (2011).
- 56 Evans S, Newnham J, MacDonald W, Hall C. Characterisation of the possible effect on birthweight following frequent prenatal ultrasound examinations. *Early Hum Dev.* **45**, 203–214 (1996).
- 57 Newnham JP, Evans SF, Michael CA, Stanley FJ, Landau LI. Effects of frequent ultrasound during pregnancy: a randomised controlled trial. *Lancet.* **342**, 887–891 (1993).
- 58 Williams LA, Evans SF, Newnham JP. Prospective cohort study of factors influencing the relative weights of the placenta and the newborn infant. *BMJ.* **314**, 1864–1868 (1997).
- 59 Ackermann-Lieblich U *et al.* Follow-up of the Swiss Cohort Study on Air Pollution and Lung Diseases in Adults (SAPALDIA 2) 1991-2003: methods and characterization of participants. *Soz Präventivmed.* **50**, 245–263 (2005).
- 60 Downs SH *et al.* Reduced exposure to PM10 and attenuated age-related decline in lung function. *N Engl J Med.* **357**, 2338–2347 (2007).
- 61 Spector TD, Williams FMK. The UK Adult Twin Registry (TwinsUK). *Twin Res Hum Genet.* **9**, 899–906 (2006).
